# Supplementary material for: Piperidine and piperazine analogs in action: zinc(ii)-mediated formation of amidines
Source: Royal Society of Chemistry journal article supplement (doi:10.1039/d4nj00235k), 2024-01-01

Supporting Information  
for

**Piperidine and piperazine analogs in action: zinc(II)-mediated formation  
of amidines**

Nina Podjed, Janez Košmrlj, Barbara Modec\*

*Faculty of Chemistry and Chemical Technology, University of Ljubljana, Večna pot 113  
1000 Ljubljana, Slovenia*

\* Corresponding author. E-mail: [barbara.modec@fkkt.uni-lj.si](mailto:barbara.modec@fkkt.uni-lj.si)

## Contents

|                                   |     |
|-----------------------------------|-----|
| 1. List of compounds              | S2  |
| 2. X-ray structure determinations | S14 |
| 3. Infrared spectroscopy          | S45 |
| 4. $^1\text{H}$ NMR spectroscopy  | S68 |

1. List of compounds with numbering scheme and chemical structures. Solvent molecules of crystallization were omitted for clarity.

[Zn(quin)<sub>2</sub>(thiomorph)<sub>2</sub>]

1

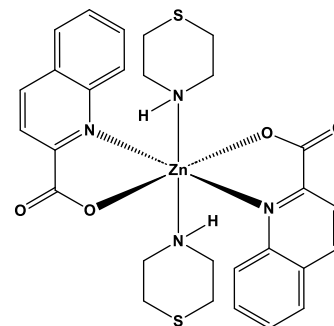

[Zn(quin)<sub>2</sub>(thiomorpham)]·CH<sub>3</sub>OH·CH<sub>3</sub>CN

2

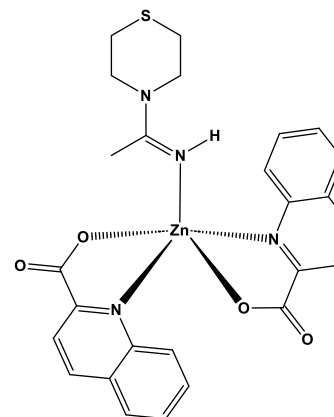

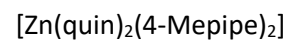

3

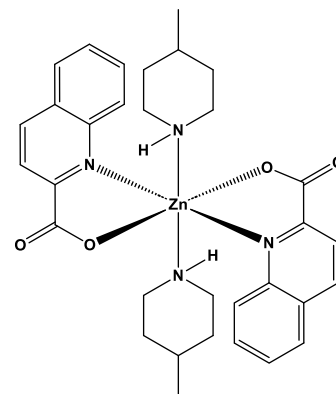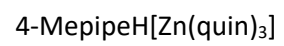

4

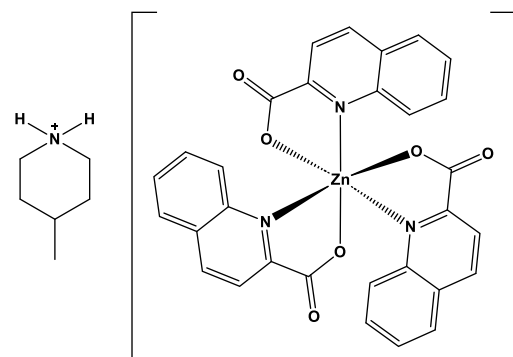

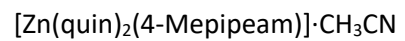

5

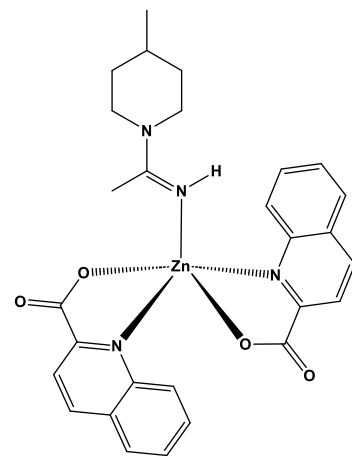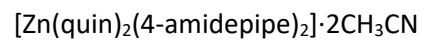

6

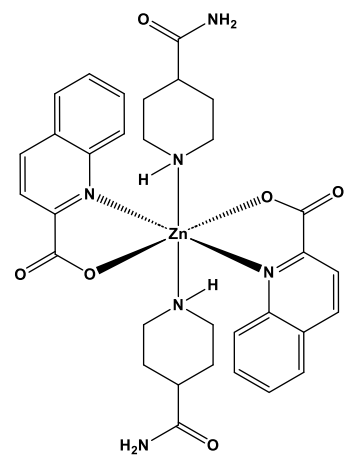

[Zn(quin)<sub>2</sub>(4-amidepipeam)]

7

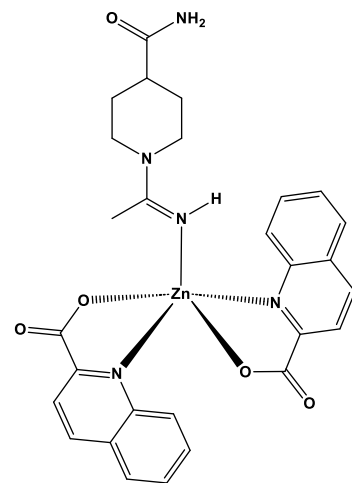

4-amidepipeam

8

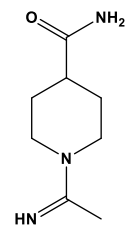

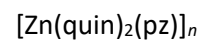

9

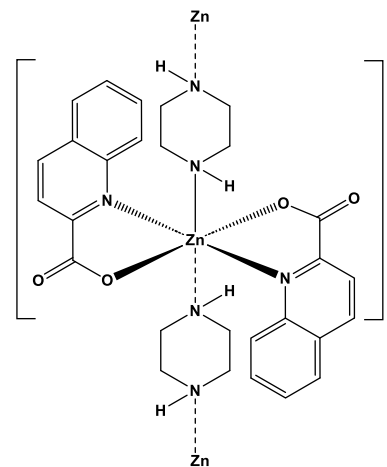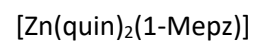

10

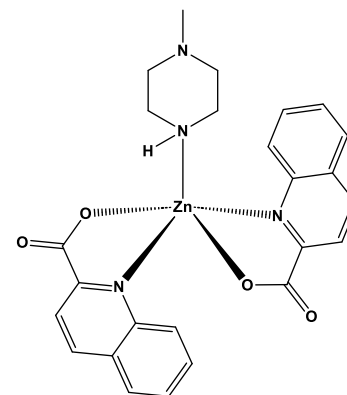

[Zn(quin)<sub>2</sub>(1-Mepz)<sub>2</sub>]-0.5CH<sub>3</sub>CN

11

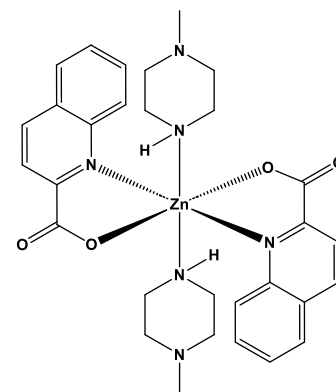

[Zn(quin)<sub>2</sub>(1-Mepzam)]

12

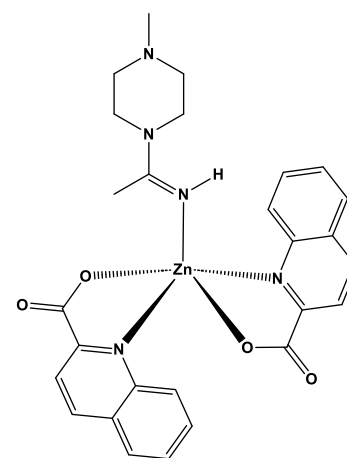



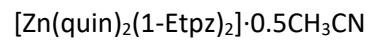

13

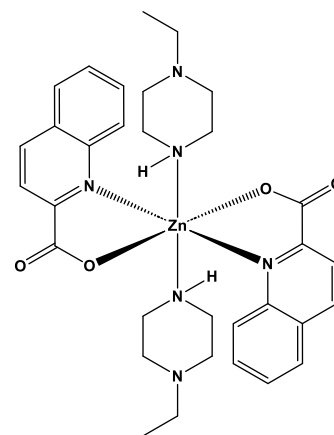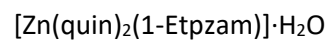

14

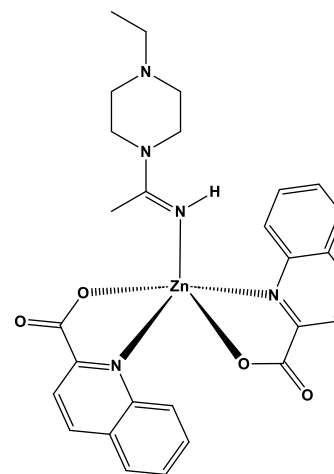

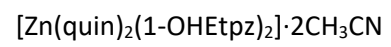

15

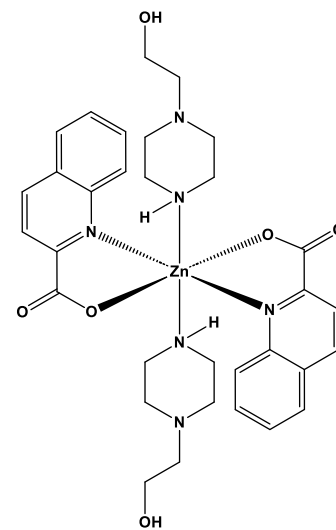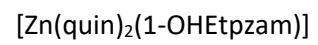

16

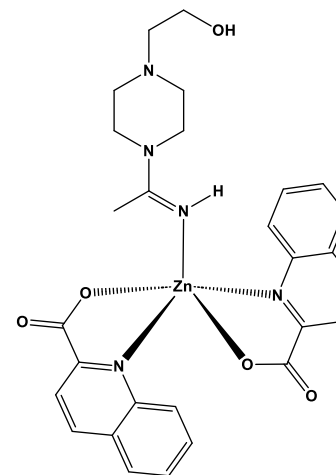

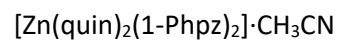

**17**

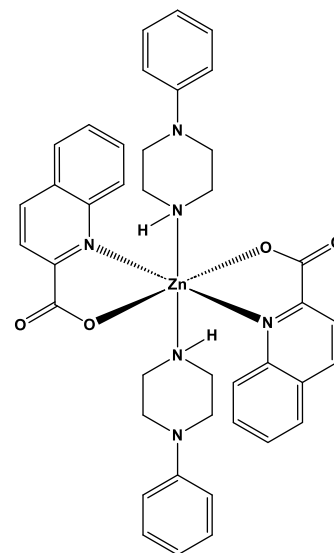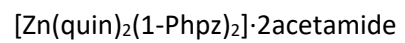

**18** (polymorphs **18a** and **18b**)

see above

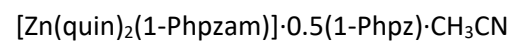

19

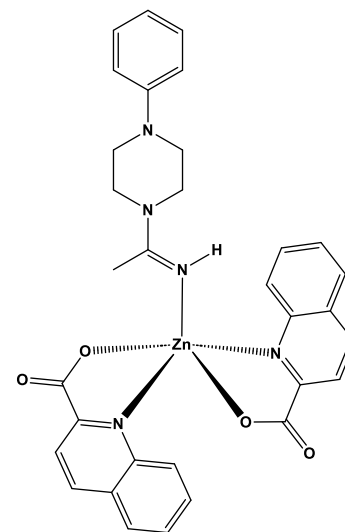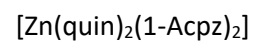

20

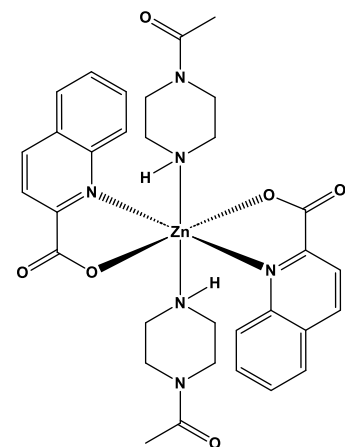

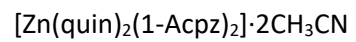

**21** (polymorphs **21a** and **21b**)

see above

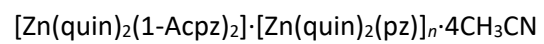

**22**

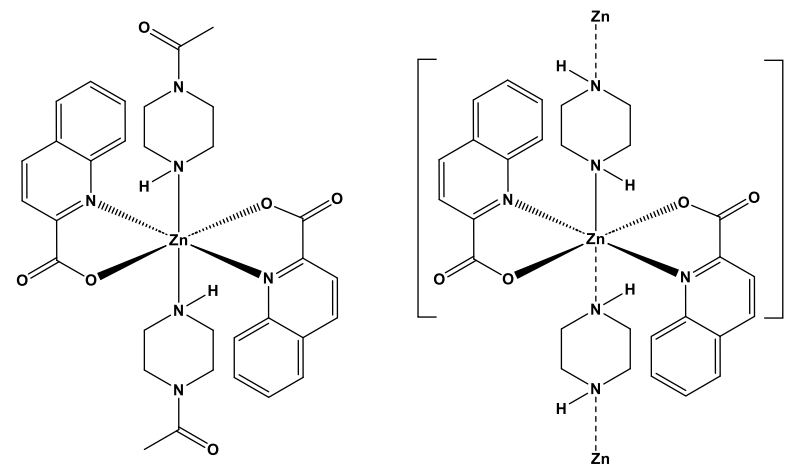

$[\text{Zn}(\text{quin})_2(\text{am})] \cdot 1.3\text{CH}_3\text{CN} \cdot 0.2\text{H}_2\text{O}$

23

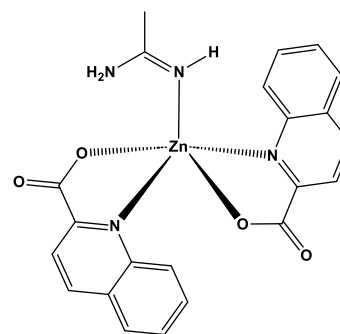

## 2. X-ray structure determinations

**Table S1.** Crystallographic data for 1–3.

|                                                          | <b>[Zn(quin)<sub>2</sub>(thiomorph)<sub>2</sub>] (1)</b>                        | <b>[Zn(quin)<sub>2</sub>(thiomorpham)]·CH<sub>3</sub>CN·CH<sub>3</sub>OH<sup>[a]</sup> (2)</b> | <b>[Zn(quin)<sub>2</sub>(4-Mepipe)<sub>2</sub>] (3)</b>          |
|----------------------------------------------------------|---------------------------------------------------------------------------------|------------------------------------------------------------------------------------------------|------------------------------------------------------------------|
| <b>Empirical formula</b>                                 | C <sub>28</sub> H <sub>30</sub> N <sub>4</sub> O <sub>4</sub> S <sub>2</sub> Zn | C <sub>29</sub> H <sub>31</sub> N <sub>5</sub> O <sub>5</sub> SZn                              | C <sub>32</sub> H <sub>38</sub> N <sub>4</sub> O <sub>4</sub> Zn |
| <b>Formula weight</b>                                    | 616.05                                                                          | 627.02                                                                                         | 608.03                                                           |
| <b>Crystal system</b>                                    | monoclinic                                                                      | triclinic                                                                                      | triclinic                                                        |
| <b>Space group</b>                                       | <i>P</i> 2 <sub>1</sub> / <i>c</i>                                              | <i>P</i> –1                                                                                    | <i>P</i> –1                                                      |
| <b><i>T</i> [K]</b>                                      | 150.00(10)                                                                      | 150.00(10)                                                                                     | 150.00(10)                                                       |
| <b><i>λ</i> [Å]</b>                                      | 0.71073                                                                         | 0.71073                                                                                        | 0.71073                                                          |
| <b><i>a</i> [Å]</b>                                      | 11.2469(3)                                                                      | 7.6502(2)                                                                                      | 10.4859(3)                                                       |
| <b><i>b</i> [Å]</b>                                      | 12.7175(3)                                                                      | 13.4372(4)                                                                                     | 11.0143(4)                                                       |
| <b><i>c</i> [Å]</b>                                      | 9.8919(3)                                                                       | 14.9144(4)                                                                                     | 13.4761(3)                                                       |
| <b><i>α</i> [°]</b>                                      | 90                                                                              | 82.689(2)                                                                                      | 104.223(2)                                                       |
| <b><i>β</i> [°]</b>                                      | 102.639(3)                                                                      | 80.642(2)                                                                                      | 94.428(2)                                                        |
| <b><i>γ</i> [°]</b>                                      | 90                                                                              | 76.138(2)                                                                                      | 94.244(3)                                                        |
| <b><i>V</i> [Å<sup>3</sup>]</b>                          | 1380.58(7)                                                                      | 1462.45(7)                                                                                     | 1497.23(8)                                                       |
| <b><i>Z</i></b>                                          | 2                                                                               | 2                                                                                              | 2                                                                |
| <b><i>D</i><sub>calc</sub> [g/cm<sup>3</sup>]</b>        | 1.482                                                                           | 1.424                                                                                          | 1.349                                                            |
| <b><i>μ</i> [mm<sup>-1</sup>]</b>                        | 1.083                                                                           | 0.958                                                                                          | 0.863                                                            |
| <b>Collected reflections</b>                             | 40131                                                                           | 28842                                                                                          | 26192                                                            |
| <b>Unique reflections</b>                                | 3988                                                                            | 7904                                                                                           | 8186                                                             |
| <b>Observed reflections</b>                              | 3484                                                                            | 6752                                                                                           | 6638                                                             |
| <b><i>R</i><sub>int</sub></b>                            | 0.0359                                                                          | 0.0361                                                                                         | 0.0279                                                           |
| <b><i>R</i><sub>1</sub> (<i>I</i> &gt; 2σ(<i>I</i>))</b> | 0.0280                                                                          | 0.0309                                                                                         | 0.0333                                                           |
| <b><i>wR</i><sub>2</sub> (all data)</b>                  | 0.0698                                                                          | 0.0761                                                                                         | 0.0815                                                           |

<sup>[a]</sup> The solvent mask function was applied.

**Table S2.** Crystallographic data for 5–10.

|                                                                            | [Zn(quin) <sub>2</sub> (4-Mepipeam)]·CH <sub>3</sub> CN (5)      | [Zn(quin) <sub>2</sub> (4-amidepipe) <sub>2</sub> ]·2CH <sub>3</sub> CN (6) | 4-amidepipeam (8)                               | [Zn(quin) <sub>2</sub> (1-Mepz)] (10)                            |
|----------------------------------------------------------------------------|------------------------------------------------------------------|-----------------------------------------------------------------------------|-------------------------------------------------|------------------------------------------------------------------|
| <b>Empirical formula</b>                                                   | C <sub>30</sub> H <sub>31</sub> N <sub>5</sub> O <sub>4</sub> Zn | C <sub>36</sub> H <sub>42</sub> N <sub>8</sub> O <sub>6</sub> Zn            | C <sub>8</sub> H <sub>15</sub> N <sub>3</sub> O | C <sub>25</sub> H <sub>24</sub> N <sub>4</sub> O <sub>4</sub> Zn |
| <b>Formula weight</b>                                                      | 590.97                                                           | 748.14                                                                      | 169.23                                          | 509.85                                                           |
| <b>Crystal system</b>                                                      | triclinic                                                        | triclinic                                                                   | monoclinic                                      | monoclinic                                                       |
| <b>Space group</b>                                                         | <i>P</i> $\bar{1}$                                               | <i>P</i> $\bar{1}$                                                          | <i>P</i> 2 <sub>1</sub>                         | <i>P</i> 2 <sub>1</sub> / <i>n</i>                               |
| <b><i>T</i> [K]</b>                                                        | 150.00(10)                                                       | 150.00(10)                                                                  | 150.00(10)                                      | 150.00(10)                                                       |
| <b><math>\lambda</math> [Å]</b>                                            | 0.71073                                                          | 0.71073                                                                     | 1.54184                                         | 0.71073                                                          |
| <b><i>a</i> [Å]</b>                                                        | 7.98150(10)                                                      | 8.5710(5)                                                                   | 4.96280(10)                                     | 10.9883(4)                                                       |
| <b><i>b</i> [Å]</b>                                                        | 12.0120(3)                                                       | 10.9044(7)                                                                  | 12.41770(10)                                    | 12.0680(5)                                                       |
| <b><i>c</i> [Å]</b>                                                        | 15.0991(3)                                                       | 10.9382(6)                                                                  | 7.50220(10)                                     | 17.4386(6)                                                       |
| <b><math>\alpha</math> [°]</b>                                             | 81.099(2)                                                        | 108.531(5)                                                                  | 90                                              | 90                                                               |
| <b><math>\beta</math> [°]</b>                                              | 79.411(2)                                                        | 108.117(5)                                                                  | 100.9800(10)                                    | 98.953(4)                                                        |
| <b><math>\gamma</math> [°]</b>                                             | 85.675(2)                                                        | 96.396(5)                                                                   | 90                                              | 90                                                               |
| <b><i>V</i> [Å<sup>3</sup>]</b>                                            | 1404.17(5)                                                       | 895.82(10)                                                                  | 453.871(12)                                     | 2284.30(15)                                                      |
| <b><i>Z</i></b>                                                            | 2                                                                | 1                                                                           | 2                                               | 4                                                                |
| <b><i>D</i><sub>calc</sub> [g/cm<sup>3</sup>]</b>                          | 1.398                                                            | 1.387                                                                       | 1.238                                           | 1.483                                                            |
| <b><math>\mu</math> [mm<sup>-1</sup>]</b>                                  | 0.919                                                            | 0.743                                                                       | 0.684                                           | 1.116                                                            |
| <b>Collected reflections</b>                                               | 41338                                                            | 8006                                                                        | 12090                                           | 13353                                                            |
| <b>Unique reflections</b>                                                  | 7828                                                             | 4590                                                                        | 1759                                            | 6051                                                             |
| <b>Observed reflections</b>                                                | 6815                                                             | 4099                                                                        | 1755                                            | 4260                                                             |
| <b><i>R</i><sub>int</sub></b>                                              | 0.0344                                                           | 0.0383                                                                      | 0.0290                                          | 0.0351                                                           |
| <b><i>R</i><sub>1</sub> (<i>I</i> &gt; 2<math>\sigma</math>(<i>I</i>))</b> | 0.0309                                                           | 0.0397                                                                      | 0.0307                                          | 0.0358                                                           |
| <b><i>wR</i><sub>2</sub> (all data)</b>                                    | 0.0758                                                           | 0.0849                                                                      | 0.0791                                          | 0.0828                                                           |



**Table S3.** Crystallographic data for **11–13**.

|                                                          | <b>[Zn(quin)<sub>2</sub>(1-Mepz)<sub>2</sub>·0.5CH<sub>3</sub>CN (11)</b> | <b>[Zn(quin)<sub>2</sub>(1-Mepzam)]<sup>[a]</sup> (12)</b>       | <b>[Zn(quin)<sub>2</sub>(1-Etpz)<sub>2</sub>·0.5CH<sub>3</sub>CN (13)</b> |
|----------------------------------------------------------|---------------------------------------------------------------------------|------------------------------------------------------------------|---------------------------------------------------------------------------|
| <b>Empirical formula</b>                                 | C <sub>31</sub> H <sub>37.5</sub> N <sub>6.5</sub> O <sub>4</sub> Zn      | C <sub>27</sub> H <sub>27</sub> N <sub>5</sub> O <sub>4</sub> Zn | C <sub>33</sub> H <sub>41.5</sub> N <sub>6.5</sub> O <sub>4</sub> Zn      |
| <b>Formula weight</b>                                    | 630.54                                                                    | 550.90                                                           | 658.59                                                                    |
| <b>Crystal system</b>                                    | triclinic                                                                 | triclinic                                                        | triclinic                                                                 |
| <b>Space group</b>                                       | <i>P</i> −1                                                               | <i>P</i> −1                                                      | <i>P</i> −1                                                               |
| <b><i>T</i> [K]</b>                                      | 150.00(10)                                                                | 150.00(10)                                                       | 150.00(10)                                                                |
| <b><i>λ</i> [Å]</b>                                      | 0.71073                                                                   | 0.71073                                                          | 0.71073                                                                   |
| <b><i>a</i> [Å]</b>                                      | 10.4192(2)                                                                | 7.9372(2)                                                        | 10.5552(4)                                                                |
| <b><i>b</i> [Å]</b>                                      | 14.5738(4)                                                                | 11.9685(4)                                                       | 12.0176(5)                                                                |
| <b><i>c</i> [Å]</b>                                      | 20.2693(5)                                                                | 15.1081(4)                                                       | 13.4817(6)                                                                |
| <b><i>α</i> [°]</b>                                      | 78.682(2)                                                                 | 79.394(3)                                                        | 72.156(4)                                                                 |
| <b><i>β</i> [°]</b>                                      | 87.613(2)                                                                 | 79.461(2)                                                        | 86.674(3)                                                                 |
| <b><i>γ</i> [°]</b>                                      | 86.401(2)                                                                 | 82.938(2)                                                        | 86.036(3)                                                                 |
| <b><i>V</i> [Å<sup>3</sup>]</b>                          | 3010.68(13)                                                               | 1380.97(7)                                                       | 1622.75(12)                                                               |
| <b><i>Z</i></b>                                          | 4                                                                         | 2                                                                | 2                                                                         |
| <b><i>D</i><sub>calc</sub> [g/cm<sup>3</sup>]</b>        | 1.391                                                                     | 1.325                                                            | 1.348                                                                     |
| <b><i>μ</i> [mm<sup>−1</sup>]</b>                        | 0.863                                                                     | 0.929                                                            | 0.804                                                                     |
| <b>Collected reflections</b>                             | 59679                                                                     | 26942                                                            | 14788                                                                     |
| <b>Unique reflections</b>                                | 16415                                                                     | 7547                                                             | 8464                                                                      |
| <b>Observed reflections</b>                              | 12708                                                                     | 6261                                                             | 6753                                                                      |
| <b><i>R</i><sub>int</sub></b>                            | 0.0294                                                                    | 0.0328                                                           | 0.0231                                                                    |
| <b><i>R</i><sub>1</sub> (<i>I</i> &gt; 2σ(<i>I</i>))</b> | 0.0330                                                                    | 0.0376                                                           | 0.0371                                                                    |
| <b><i>wR</i><sub>2</sub> (all data)</b>                  | 0.0899                                                                    | 0.1004                                                           | 0.0948                                                                    |

<sup>[a]</sup> The solvent mask function was applied.

**Table S4.** Crystallographic data for **14–16**.

|                                                          | <b>[Zn(quin)<sub>2</sub>(1-Etpzam)]·H<sub>2</sub>O (14)</b>      | <b>[Zn(quin)<sub>2</sub>(1-OHEtpz)<sub>2</sub>]·2CH<sub>3</sub>CN (15)</b> | <b>[Zn(quin)<sub>2</sub>(1-OHEtpzam)]<sup>[a]</sup> (16)</b>     |
|----------------------------------------------------------|------------------------------------------------------------------|----------------------------------------------------------------------------|------------------------------------------------------------------|
| <b>Empirical formula</b>                                 | C <sub>28</sub> H <sub>31</sub> N <sub>5</sub> O <sub>5</sub> Zn | C <sub>36</sub> H <sub>46</sub> N <sub>8</sub> O <sub>6</sub> Zn           | C <sub>28</sub> H <sub>29</sub> N <sub>5</sub> O <sub>5</sub> Zn |
| <b>Formula weight</b>                                    | 582.95                                                           | 752.18                                                                     | 580.93                                                           |
| <b>Crystal system</b>                                    | monoclinic                                                       | triclinic                                                                  | triclinic                                                        |
| <b>Space group</b>                                       | <i>P</i> 2 <sub>1</sub> / <i>c</i>                               | <i>P</i> –1                                                                | <i>P</i> –1                                                      |
| <b><i>T</i> [K]</b>                                      | 150.00(10)                                                       | 150.00(10)                                                                 | 150.00(10)                                                       |
| <b><i>λ</i> [Å]</b>                                      | 0.71073                                                          | 0.71073                                                                    | 0.71073                                                          |
| <b><i>a</i> [Å]</b>                                      | 7.9223(4)                                                        | 7.8233(2)                                                                  | 7.6949(4)                                                        |
| <b><i>b</i> [Å]</b>                                      | 22.5925(13)                                                      | 11.2495(2)                                                                 | 13.1323(7)                                                       |
| <b><i>c</i> [Å]</b>                                      | 15.2268(8)                                                       | 20.2794(6)                                                                 | 15.2125(7)                                                       |
| <b><i>α</i> [°]</b>                                      | 90                                                               | 87.078(2)                                                                  | 77.884(4)                                                        |
| <b><i>β</i> [°]</b>                                      | 102.820(5)                                                       | 85.696(2)                                                                  | 78.618(4)                                                        |
| <b><i>γ</i> [°]</b>                                      | 90                                                               | 86.042(2)                                                                  | 77.812(5)                                                        |
| <b><i>V</i> [Å<sup>3</sup>]</b>                          | 2657.4(3)                                                        | 1773.59(8)                                                                 | 1450.17(13)                                                      |
| <b><i>Z</i></b>                                          | 4                                                                | 2                                                                          | 2                                                                |
| <b><i>D</i><sub>calc</sub> [g/cm<sup>3</sup>]</b>        | 1.457                                                            | 1.408                                                                      | 1.330                                                            |
| <b><i>μ</i> [mm<sup>-1</sup>]</b>                        | 0.973                                                            | 0.750                                                                      | 0.891                                                            |
| <b>Collected reflections</b>                             | 11925                                                            | 34681                                                                      | 13965                                                            |
| <b>Unique reflections</b>                                | 5208                                                             | 9721                                                                       | 7470                                                             |
| <b>Observed reflections</b>                              | 3444                                                             | 8058                                                                       | 5499                                                             |
| <b><i>R</i><sub>int</sub></b>                            | 0.0472                                                           | 0.0368                                                                     | 0.0345                                                           |
| <b><i>R</i><sub>1</sub> (<i>I</i> &gt; 2σ(<i>I</i>))</b> | 0.0464                                                           | 0.0374                                                                     | 0.0473                                                           |
| <b><i>wR</i><sub>2</sub> (all data)</b>                  | 0.0885                                                           | 0.0899                                                                     | 0.1052                                                           |

<sup>[a]</sup> The solvent mask function was applied.

**Table S5.** Crystallographic data for **17–18b**.

|                                                          | <b>[Zn(quin)<sub>2</sub>(1-Phpz)<sub>2</sub>·CH<sub>3</sub>CN (17)</b> | <b>[Zn(quin)<sub>2</sub>(1-Phpz)<sub>2</sub>·2acetamide (18a)</b> | <b>[Zn(quin)<sub>2</sub>(1-Phpz)<sub>2</sub>·2acetamide (18b)</b> |
|----------------------------------------------------------|------------------------------------------------------------------------|-------------------------------------------------------------------|-------------------------------------------------------------------|
| <b>Empirical formula</b>                                 | C <sub>42</sub> H <sub>43</sub> N <sub>7</sub> O <sub>4</sub> Zn       | C <sub>44</sub> H <sub>50</sub> N <sub>8</sub> O <sub>6</sub> Zn  | C <sub>44</sub> H <sub>50</sub> N <sub>8</sub> O <sub>6</sub> Zn  |
| <b>Formula weight</b>                                    | 775.20                                                                 | 852.29                                                            | 852.29                                                            |
| <b>Crystal system</b>                                    | monoclinic                                                             | triclinic                                                         | monoclinic                                                        |
| <b>Space group</b>                                       | <i>P</i> 2 <sub>1</sub> / <i>n</i>                                     | <i>P</i> –1                                                       | <i>P</i> 2 <sub>1</sub> / <i>c</i>                                |
| <b><i>T</i> [K]</b>                                      | 150.00(10)                                                             | 150.00(10)                                                        | 150.00(10)                                                        |
| <b><i>λ</i> [Å]</b>                                      | 1.54184                                                                | 0.71073                                                           | 0.71073                                                           |
| <b><i>a</i> [Å]</b>                                      | 13.61490(10)                                                           | 7.9641(2)                                                         | 11.2690(2)                                                        |
| <b><i>b</i> [Å]</b>                                      | 10.83280(10)                                                           | 10.7052(4)                                                        | 17.3987(3)                                                        |
| <b><i>c</i> [Å]</b>                                      | 25.0497(3)                                                             | 12.7812(5)                                                        | 11.4134(2)                                                        |
| <b><i>α</i> [°]</b>                                      | 90                                                                     | 101.629(4)                                                        | 90                                                                |
| <b><i>β</i> [°]</b>                                      | 93.3260(10)                                                            | 101.475(3)                                                        | 115.978(2)                                                        |
| <b><i>γ</i> [°]</b>                                      | 90                                                                     | 101.582(3)                                                        | 90                                                                |
| <b><i>V</i> [Å<sup>3</sup>]</b>                          | 3688.29(6)                                                             | 1012.52(6)                                                        | 2011.68(7)                                                        |
| <b><i>Z</i></b>                                          | 4                                                                      | 1                                                                 | 2                                                                 |
| <b><i>D</i><sub>calc</sub> [g/cm<sup>3</sup>]</b>        | 1.396                                                                  | 1.398                                                             | 1.407                                                             |
| <b><i>μ</i> [mm<sup>-1</sup>]</b>                        | 1.358                                                                  | 0.667                                                             | 0.671                                                             |
| <b>Collected reflections</b>                             | 17736                                                                  | 20001                                                             | 78590                                                             |
| <b>Unique reflections</b>                                | 7509                                                                   | 5524                                                              | 5875                                                              |
| <b>Observed reflections</b>                              | 6690                                                                   | 4918                                                              | 5038                                                              |
| <b><i>R</i><sub>int</sub></b>                            | 0.0237                                                                 | 0.0358                                                            | 0.0348                                                            |
| <b><i>R</i><sub>1</sub> (<i>I</i> &gt; 2σ(<i>I</i>))</b> | 0.0315                                                                 | 0.0335                                                            | 0.0297                                                            |
| <b><i>wR</i><sub>2</sub> (all data)</b>                  | 0.0870                                                                 | 0.0801                                                            | 0.0791                                                            |

**Table S6.** Crystallographic data for **19–21a**.

|                                                                            | <b>[Zn(quin)<sub>2</sub>(1-Phpzam)]·0.5(1-Phpz)·CH<sub>3</sub>CN<sup>[a]</sup> (19)</b> | <b>[Zn(quin)<sub>2</sub>(1-Acpz)<sub>2</sub>] (20)</b>           | <b>[Zn(quin)<sub>2</sub>(1-Acpz)<sub>2</sub>]·2CH<sub>3</sub>CN (21a)</b> |
|----------------------------------------------------------------------------|-----------------------------------------------------------------------------------------|------------------------------------------------------------------|---------------------------------------------------------------------------|
| <b>Empirical formula</b>                                                   | C <sub>39</sub> H <sub>39</sub> N <sub>7</sub> O <sub>4</sub> Zn                        | C <sub>32</sub> H <sub>36</sub> N <sub>6</sub> O <sub>6</sub> Zn | C <sub>36</sub> H <sub>42</sub> N <sub>8</sub> O <sub>6</sub> Zn          |
| <b>Formula weight</b>                                                      | 735.14                                                                                  | 666.04                                                           | 748.14                                                                    |
| <b>Crystal system</b>                                                      | triclinic                                                                               | monoclinic                                                       | triclinic                                                                 |
| <b>Space group</b>                                                         | <i>P</i> $\bar{1}$                                                                      | <i>P</i> 2 <sub>1</sub> / <i>n</i>                               | <i>P</i> $\bar{1}$                                                        |
| <b><i>T</i> [K]</b>                                                        | 150.00(10)                                                                              | 150.00(10)                                                       | 150.00(10)                                                                |
| <b><math>\lambda</math> [Å]</b>                                            | 0.71073                                                                                 | 0.71073                                                          | 0.71073                                                                   |
| <b><i>a</i> [Å]</b>                                                        | 7.6458(2)                                                                               | 9.9752(3)                                                        | 10.5815(4)                                                                |
| <b><i>b</i> [Å]</b>                                                        | 15.0408(4)                                                                              | 11.1948(3)                                                       | 12.3264(5)                                                                |
| <b><i>c</i> [Å]</b>                                                        | 16.2179(4)                                                                              | 14.1436(4)                                                       | 13.5644(6)                                                                |
| <b><math>\alpha</math> [°]</b>                                             | 72.152(2)                                                                               | 90                                                               | 86.699(4)                                                                 |
| <b><math>\beta</math> [°]</b>                                              | 81.180(2)                                                                               | 105.524(3)                                                       | 87.372(3)                                                                 |
| <b><math>\gamma</math> [°]</b>                                             | 80.559(2)                                                                               | 90                                                               | 82.306(3)                                                                 |
| <b><i>V</i> [Å<sup>3</sup>]</b>                                            | 1740.66(8)                                                                              | 1521.80(8)                                                       | 1749.09(12)                                                               |
| <b><i>Z</i></b>                                                            | 2                                                                                       | 2                                                                | 2                                                                         |
| <b><i>D</i><sub>calc</sub> [g/cm<sup>3</sup>]</b>                          | 1.403                                                                                   | 1.454                                                            | 1.421                                                                     |
| <b><math>\mu</math> [mm<sup>-1</sup>]</b>                                  | 0.758                                                                                   | 0.863                                                            | 0.761                                                                     |
| <b>Collected reflections</b>                                               | 34456                                                                                   | 29908                                                            | 17384                                                                     |
| <b>Unique reflections</b>                                                  | 9515                                                                                    | 4320                                                             | 9087                                                                      |
| <b>Observed reflections</b>                                                | 8029                                                                                    | 3716                                                             | 6266                                                                      |
| <b><i>R</i><sub>int</sub></b>                                              | 0.0354                                                                                  | 0.0396                                                           | 0.0331                                                                    |
| <b><i>R</i><sub>1</sub> (<i>I</i> &gt; 2<math>\sigma</math>(<i>I</i>))</b> | 0.0319                                                                                  | 0.0297                                                           | 0.0395                                                                    |
| <b><i>wR</i><sub>2</sub> (all data)</b>                                    | 0.0830                                                                                  | 0.0728                                                           | 0.0820                                                                    |

<sup>[a]</sup> The solvent mask function was applied.

**Table S7.** Crystallographic data for **21b–23**.

|                                                          | <b>[Zn(quin)<sub>2</sub>(1-Acpz)<sub>2</sub>]<sub>2</sub>·2CH<sub>3</sub>CN (21b)</b> | <b>[Zn(quin)<sub>2</sub>(1-Acpz)<sub>2</sub>]<sub>2</sub>·[Zn(quin)<sub>2</sub>(pz)]<sub>n</sub>·4CH<sub>3</sub>CN (22)</b> | <b>[Zn(quin)<sub>2</sub>(am)]·1.3CH<sub>3</sub>CN·0.2H<sub>2</sub>O (23)</b> |
|----------------------------------------------------------|---------------------------------------------------------------------------------------|-----------------------------------------------------------------------------------------------------------------------------|------------------------------------------------------------------------------|
| <b>Empirical formula</b>                                 | C <sub>36</sub> H <sub>42</sub> N <sub>8</sub> O <sub>6</sub> Zn                      | C <sub>64</sub> H <sub>70</sub> N <sub>14</sub> O <sub>10</sub> Zn <sub>2</sub>                                             | C <sub>24.7</sub> H <sub>22.4</sub> N <sub>5.3</sub> O <sub>4.2</sub> Zn     |
| <b>Formula weight</b>                                    | 748.14                                                                                | 1326.08                                                                                                                     | 526.12                                                                       |
| <b>Crystal system</b>                                    | monoclinic                                                                            | triclinic                                                                                                                   | triclinic                                                                    |
| <b>Space group</b>                                       | <i>P</i> 2 <sub>1</sub> / <i>n</i>                                                    | <i>P</i> –1                                                                                                                 | <i>P</i> –1                                                                  |
| <b><i>T</i> [K]</b>                                      | 150.00(10)                                                                            | 150.00(10)                                                                                                                  | 150.00(10)                                                                   |
| <b><i>λ</i> [Å]</b>                                      | 1.54184                                                                               | 0.71073                                                                                                                     | 0.71073                                                                      |
| <b><i>a</i> [Å]</b>                                      | 13.7663(4)                                                                            | 7.3460(2)                                                                                                                   | 8.1567(3)                                                                    |
| <b><i>b</i> [Å]</b>                                      | 7.4819(2)                                                                             | 13.6349(3)                                                                                                                  | 9.9520(4)                                                                    |
| <b><i>c</i> [Å]</b>                                      | 17.7683(5)                                                                            | 15.7320(4)                                                                                                                  | 15.1357(6)                                                                   |
| <b><i>α</i> [°]</b>                                      | 90                                                                                    | 90.652(2)                                                                                                                   | 77.896(4)                                                                    |
| <b><i>β</i> [°]</b>                                      | 103.158(3)                                                                            | 96.810(2)                                                                                                                   | 78.984(3)                                                                    |
| <b><i>γ</i> [°]</b>                                      | 90                                                                                    | 96.254(2)                                                                                                                   | 84.021(3)                                                                    |
| <b><i>V</i> [Å<sup>3</sup>]</b>                          | 1782.05(9)                                                                            | 1554.85(7)                                                                                                                  | 1176.56(8)                                                                   |
| <b><i>Z</i></b>                                          | 2                                                                                     | 1                                                                                                                           | 2                                                                            |
| <b><i>D</i><sub>calc</sub> [g/cm<sup>3</sup>]</b>        | 1.394                                                                                 | 1.416                                                                                                                       | 1.485                                                                        |
| <b><i>μ</i> [mm<sup>-1</sup>]</b>                        | 1.432                                                                                 | 0.842                                                                                                                       | 1.088                                                                        |
| <b>Collected reflections</b>                             | 7240                                                                                  | 45344                                                                                                                       | 10357                                                                        |
| <b>Unique reflections</b>                                | 3602                                                                                  | 8691                                                                                                                        | 5608                                                                         |
| <b>Observed reflections</b>                              | 3134                                                                                  | 6913                                                                                                                        | 4591                                                                         |
| <b><i>R</i><sub>int</sub></b>                            | 0.0254                                                                                | 0.0397                                                                                                                      | 0.0280                                                                       |
| <b><i>R</i><sub>1</sub> (<i>I</i> &gt; 2σ(<i>I</i>))</b> | 0.0496                                                                                | 0.0368                                                                                                                      | 0.0388                                                                       |
| <b><i>wR</i><sub>2</sub> (all data)</b>                  | 0.1439                                                                                | 0.0969                                                                                                                      | 0.0894                                                                       |

## Crystal structures of zinc(II) complexes with amines

**Figure S1.** ORTEP diagram of  $[\text{Zn}(\text{quin})_2(\text{thiomorph})_2]$  (**1**). Displacement ellipsoids are drawn at the 50% probability level. Hydrogen atoms are shown as spheres of arbitrary radii.

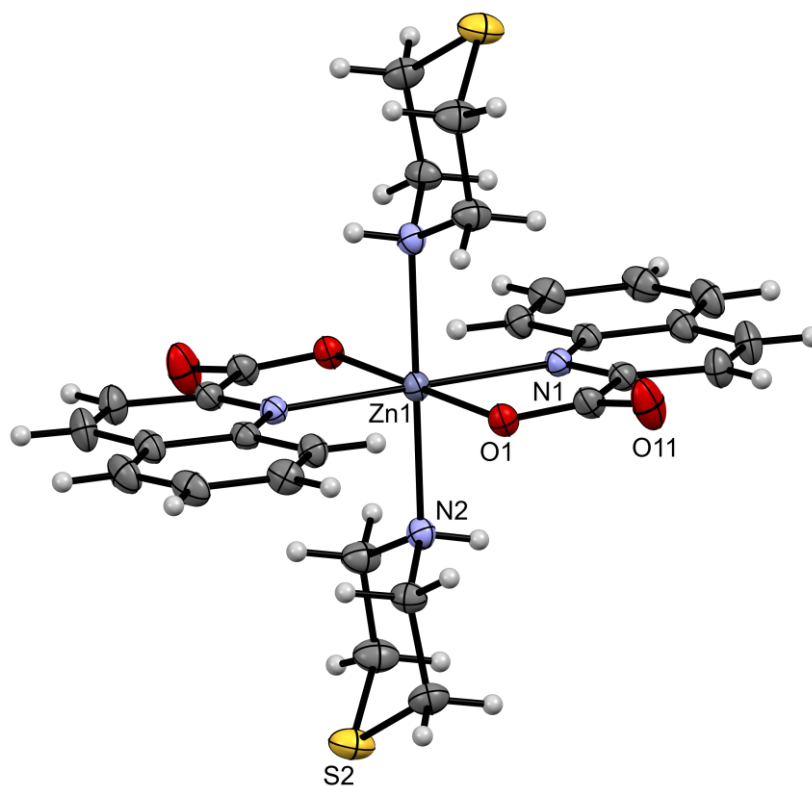

**Figure S2.** ORTEP diagram of  $[\text{Zn}(\text{quin})_2(4\text{-Mepipe})_2]$  (**3**). Displacement ellipsoids are drawn at the 50% probability level. Hydrogen atoms are shown as spheres of arbitrary radii.

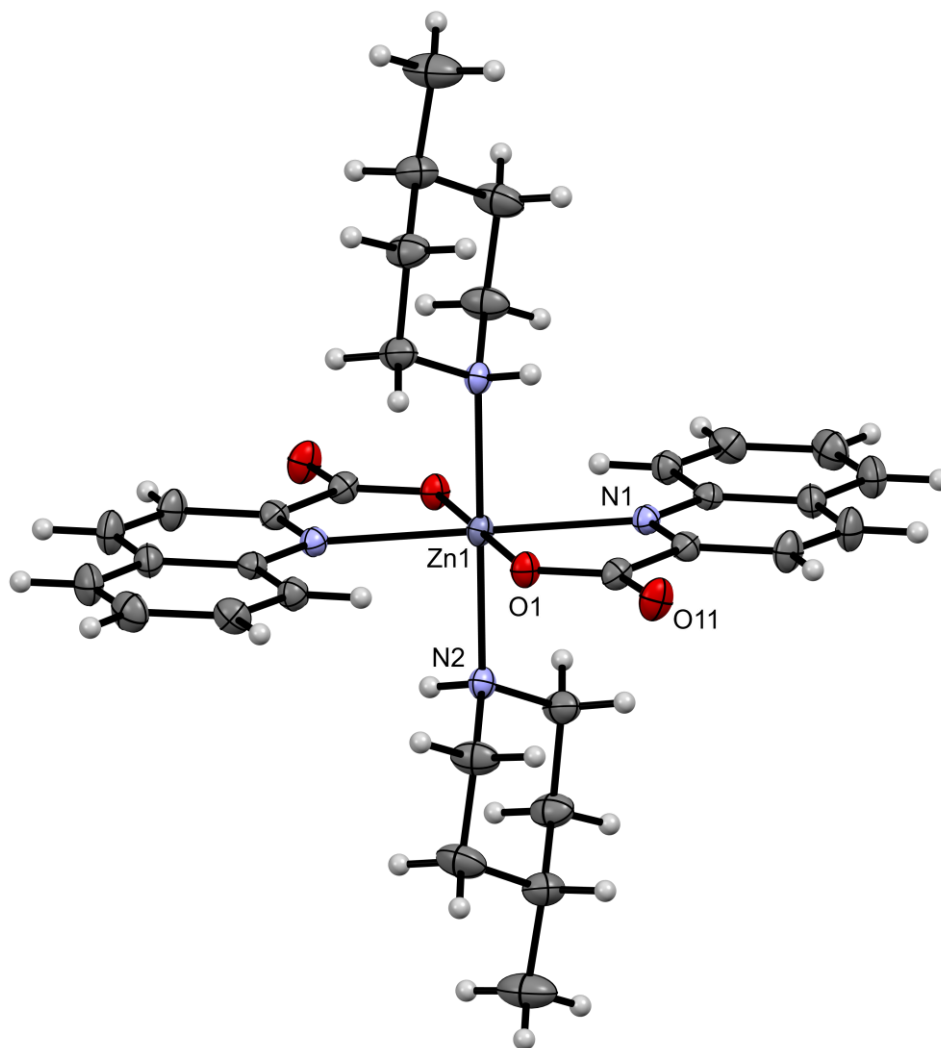

**Figure S3.** ORTEP diagram of  $[\text{Zn}(\text{quin})_2(4\text{-amidepipe})_2]$ , found in **6**. Displacement ellipsoids are drawn at the 50% probability level. Hydrogen atoms are shown as spheres of arbitrary radii.

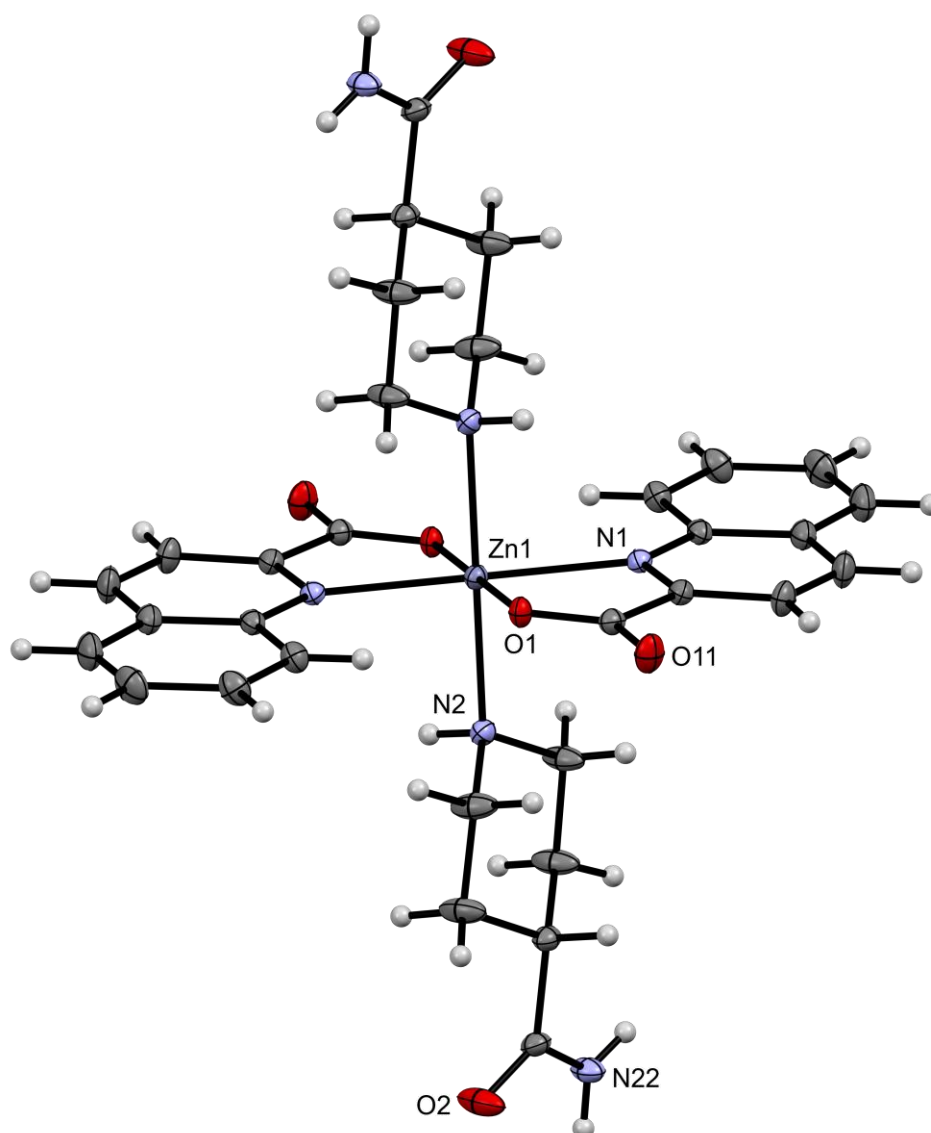



**Figure S4.** ORTEP diagram of  $[\text{Zn}(\text{quin})_2(1\text{-Etpz})_2]$ , found in **13**. Displacement ellipsoids are drawn at the 50% probability level. Hydrogen atoms are shown as spheres of arbitrary radii.

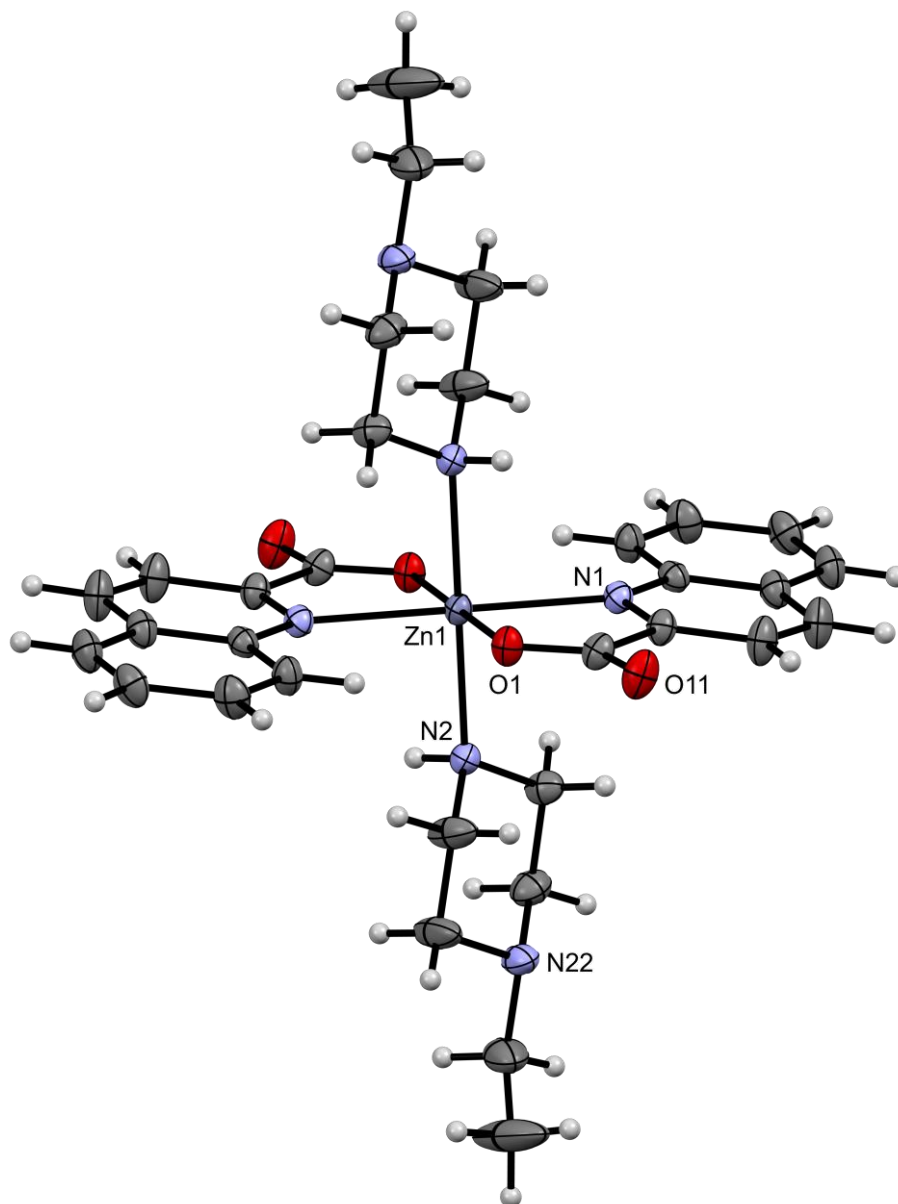

**Figure S5.** ORTEP diagram of  $[\text{Zn}(\text{quin})_2(1\text{-OHEtpz})_2]$ , found in **15**. Displacement ellipsoids are drawn at the 50% probability level. Hydrogen atoms are shown as spheres of arbitrary radii.

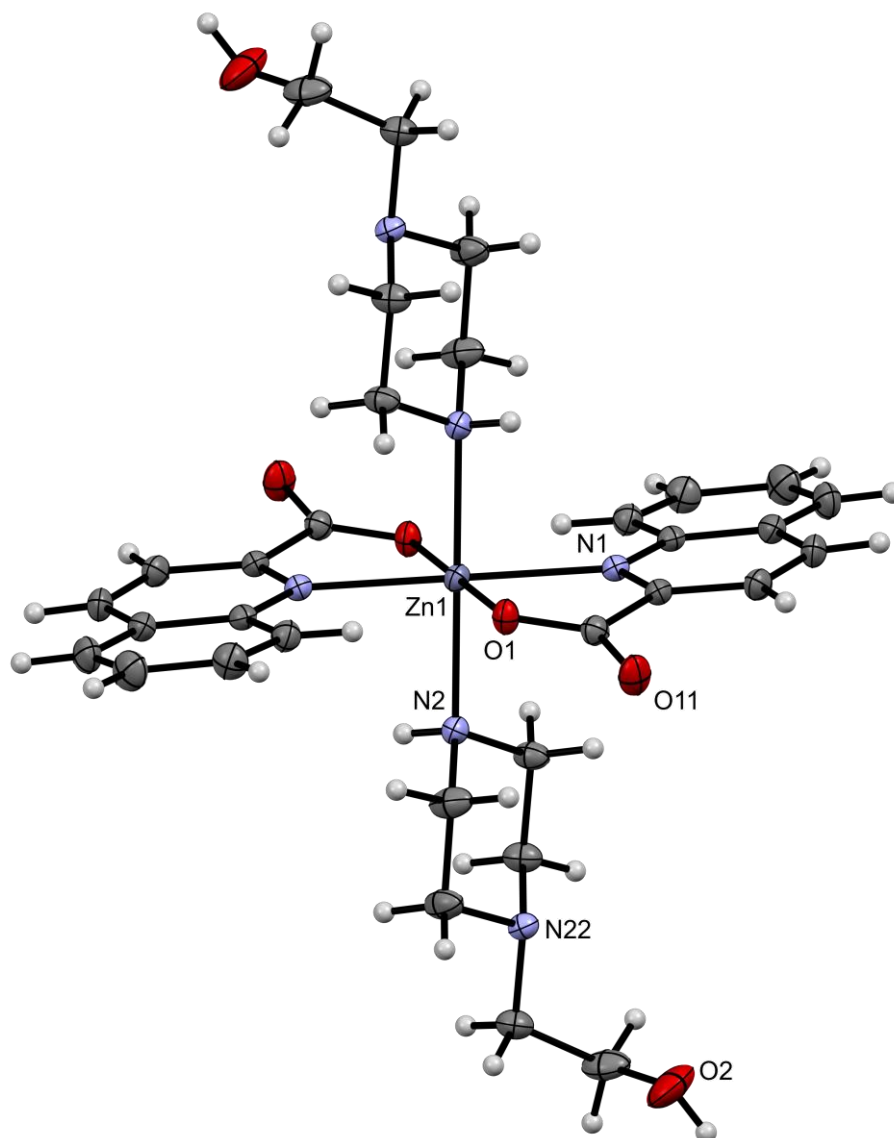

**Figure S6.** ORTEP diagram of  $[\text{Zn}(\text{quin})_2(1\text{-Phpz})_2]$ , found in **17**. Displacement ellipsoids are drawn at the 50% probability level. Hydrogen atoms are shown as spheres of arbitrary radii.

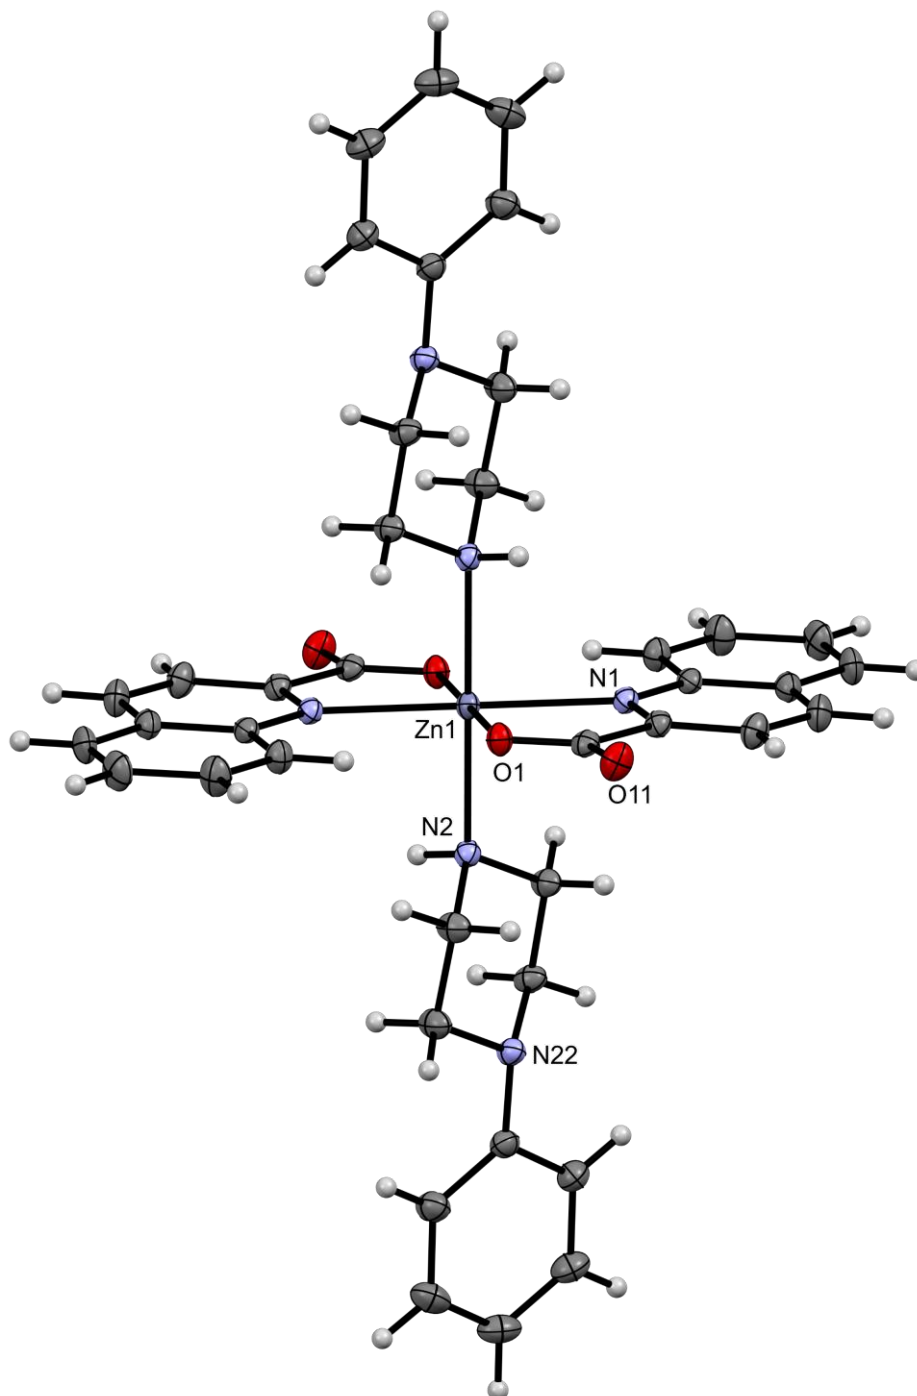

**Figure S7.** ORTEP diagram of  $[\text{Zn}(\text{quin})_2(1\text{-Acpz})_2]$  (**20**). Displacement ellipsoids are drawn at the 50% probability level. Hydrogen atoms are shown as spheres of arbitrary radii.

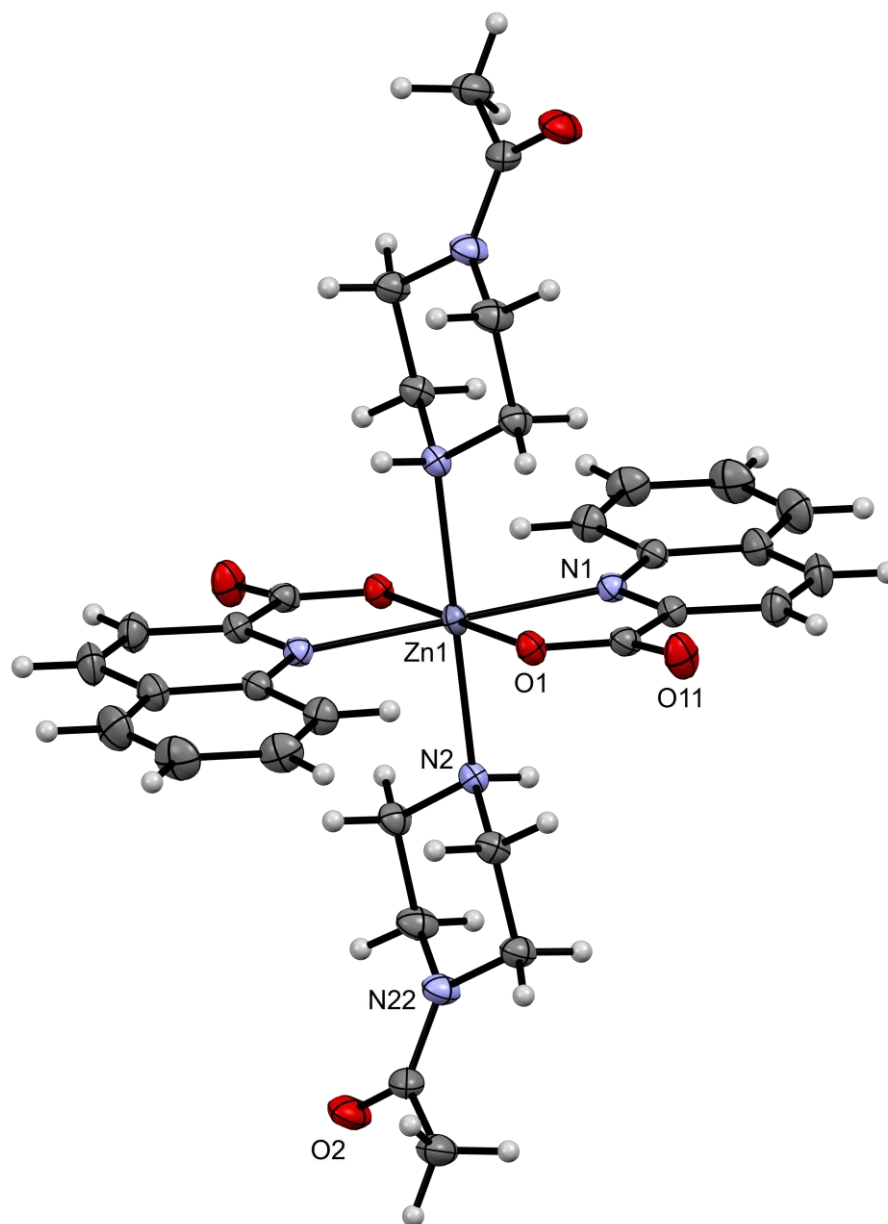

### Crystal structures of zinc(II) complexes with amidines

**Figure S8.** ORTEP diagram of  $[\text{Zn}(\text{quin})_2(\text{thiomorpham})]$ , found in **2**. Displacement ellipsoids are drawn at the 50% probability level. Hydrogen atoms are shown as spheres of arbitrary radii.

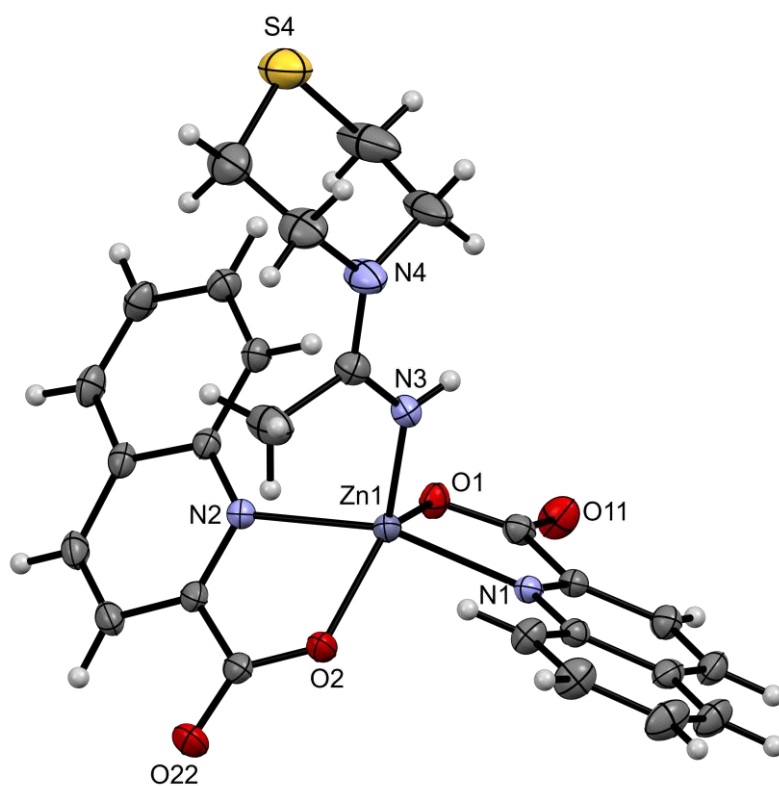

**Figure S9.** ORTEP diagram of  $[\text{Zn}(\text{quin})_2(4\text{-Mepipecam})]$ , found in **5**. Displacement ellipsoids are drawn at the 50% probability level. Hydrogen atoms are shown as spheres of arbitrary radii.

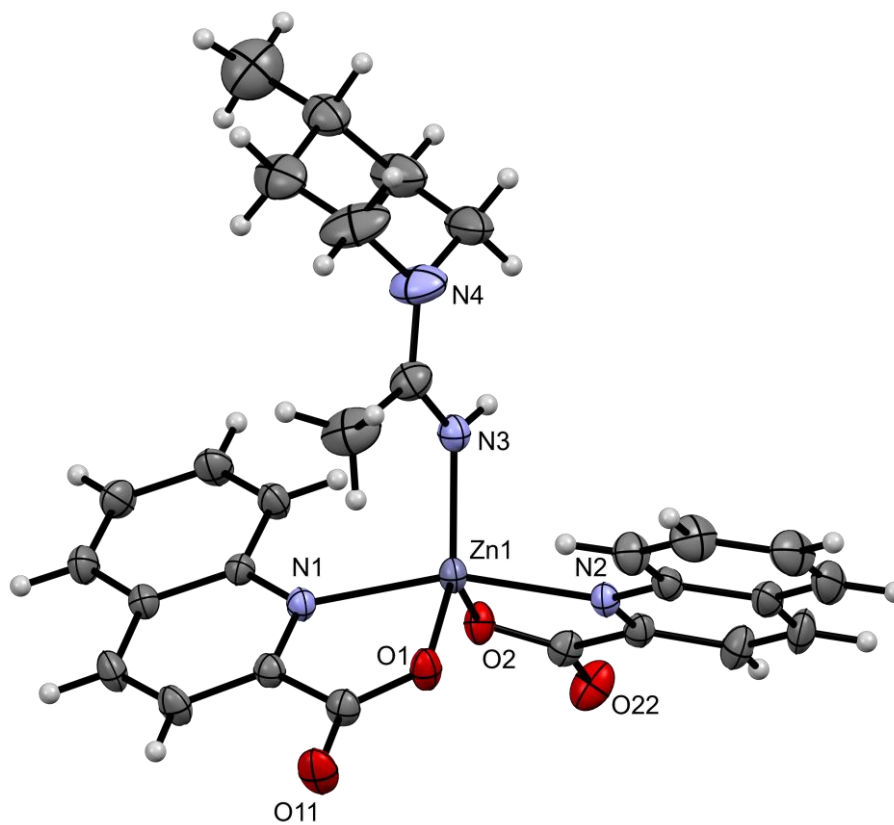

**Figure S10.** ORTEP diagram of  $[\text{Zn}(\text{quin})_2(1\text{-Mepzam})]$ , found in **12**. Displacement ellipsoids are drawn at the 50% probability level. Hydrogen atoms are shown as spheres of arbitrary radii.

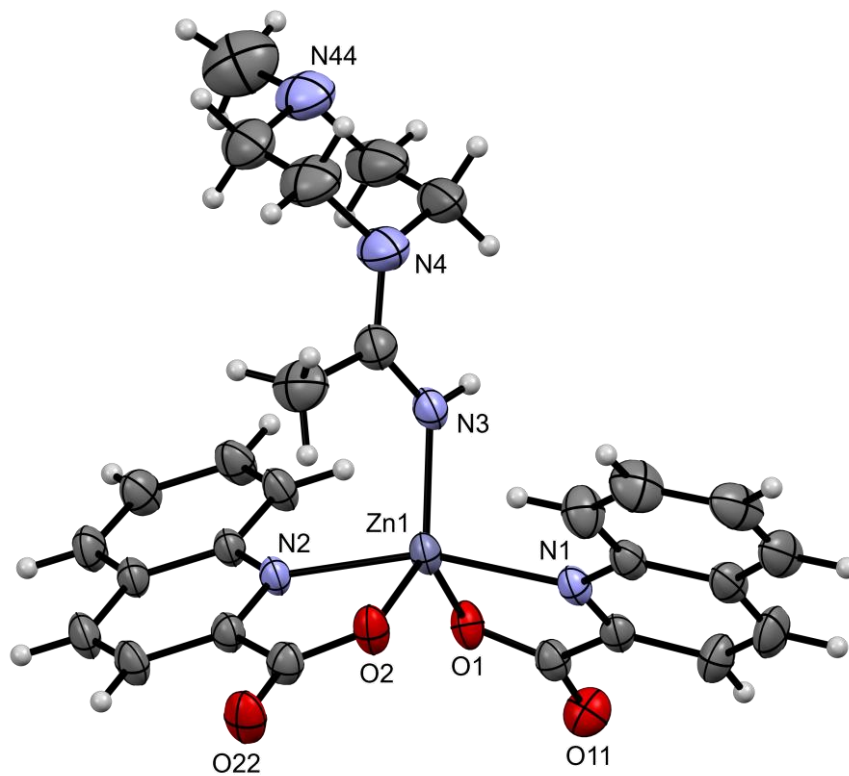

**Figure S11.** ORTEP diagram of  $[\text{Zn}(\text{quin})_2(1\text{-Etpzam})]$ , found in **14**. Displacement ellipsoids are drawn at the 50% probability level. Hydrogen atoms are shown as spheres of arbitrary radii.

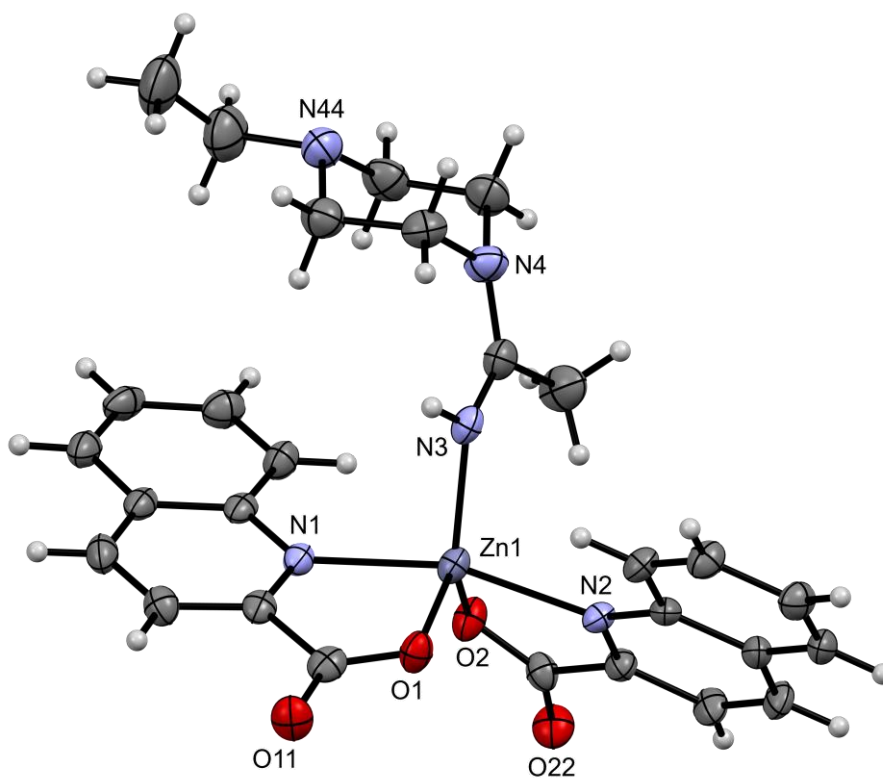



**Figure S12.** ORTEP diagram of  $[\text{Zn}(\text{quin})_2(1\text{-Phpzam})]$ , found in **19**. Displacement ellipsoids are drawn at the 50% probability level. Hydrogen atoms are shown as spheres of arbitrary radii.

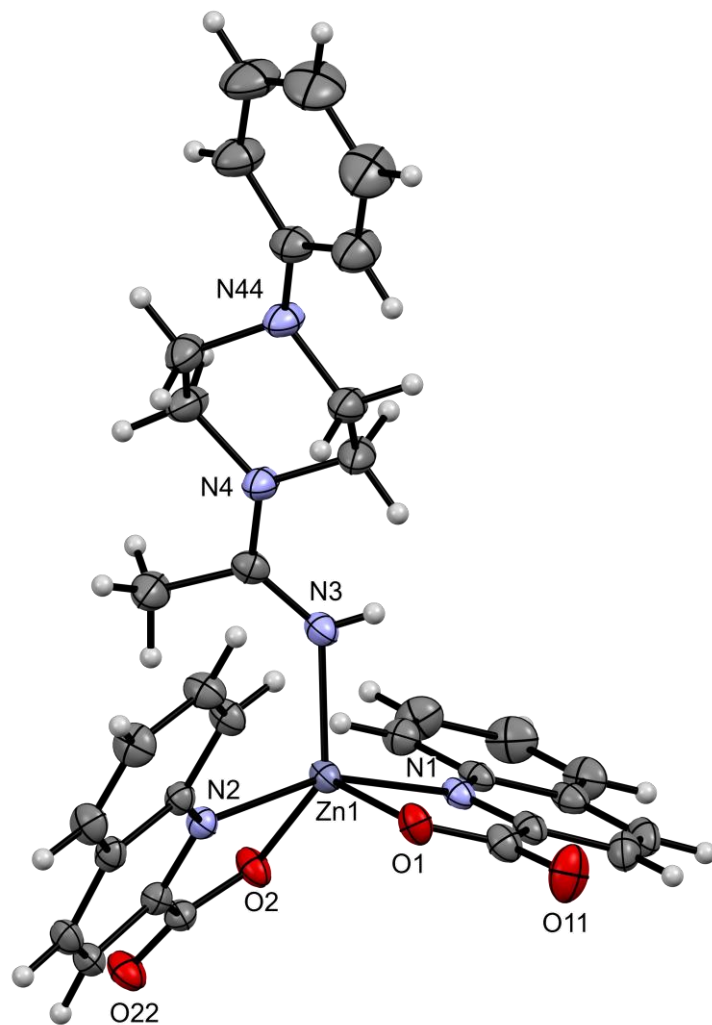

## Polymorphism

**Figure S13.** Overlay of  $[\text{Zn}(\text{quin})_2(1\text{-Phpz})_2]$  complex molecules, found in **18a** and **18b** polymorphs. The root mean square deviation value was 0.3471 and the maximum distance between equivalent atoms was 0.8221 Å. Color code: gray – **18a**, blue – **18b**. The overlay was done by Mercury.<sup>S1</sup>

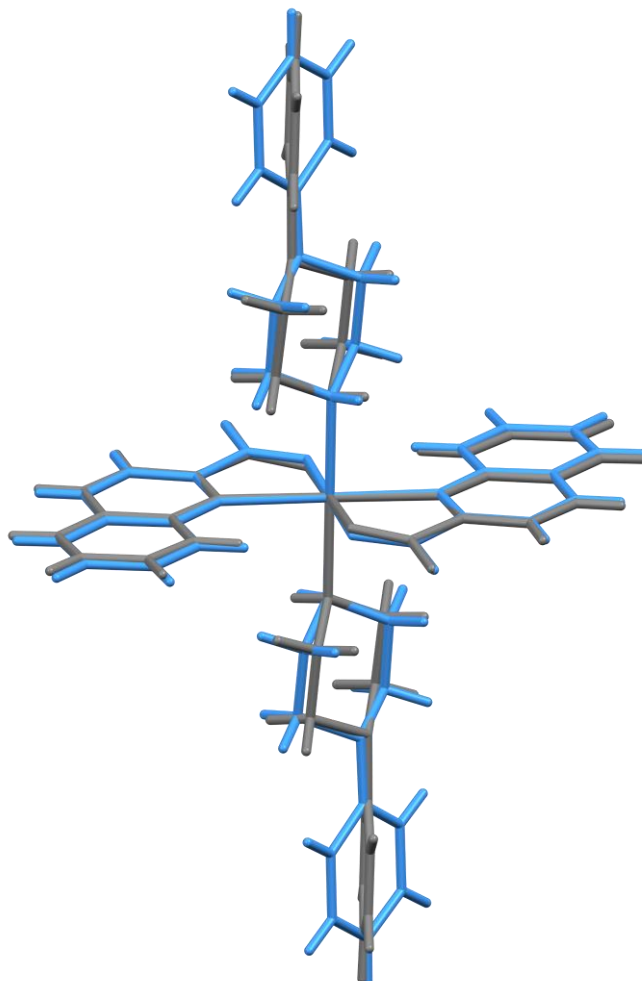

<sup>S1</sup> Macrae, C.F.; Sovago, I.; Cottrell, S.J.; Galek, P.T.A.; McCabe, P.; Pidcock, E.; Platings, M.; Shields, G.P.; Stevens, J.S.; Towler, M.; Wood, P.A. *J. Appl. Cryst.* **2020**, *53*, 226–235, doi:10.1107/S1600576719014092.

**Figure S14.** Overlay of  $[\text{Zn}(\text{quin})_2(1\text{-Acpz})_2]$  complex molecules, found in **21a** and **21b** polymorphs. The RMSD values were 0.7989 and 0.8360 and the maximum distances were 2.8186 and 2.9406 Å. Two values are given because the asymmetric unit of **21a** contains two halves of complex molecules. Color code: gray – **21a**, blue – **21b**. The overlay was done by Mercury.<sup>S1</sup>

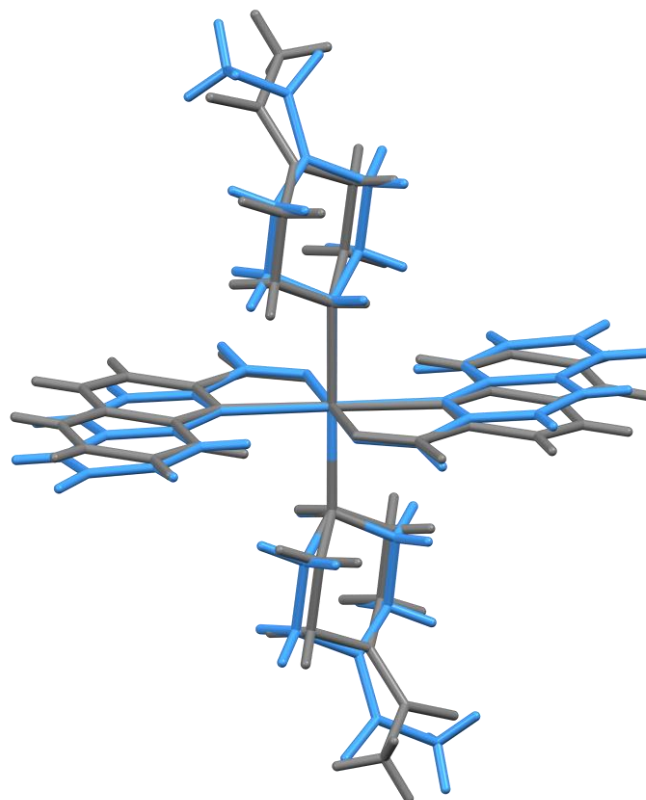

<sup>S1</sup> Macrae, C.F.; Sovago, I.; Cottrell, S.J.; Galek, P.T.A.; McCabe, P.; Pidcock, E.; Platings, M.; Shields, G.P.; Stevens, J.S.; Towler, M.; Wood, P.A. *J. Appl. Cryst.* **2020**, *53*, 226–235, doi:10.1107/S1600576719014092.

## Intermolecular interactions

**Table S8.** Hydrogen bond parameters for compounds with coordinated amines [Å].

| Compound                                                                                                                    | Hydrogen bond                                                                                                     | Donor...acceptor                                                                               |
|-----------------------------------------------------------------------------------------------------------------------------|-------------------------------------------------------------------------------------------------------------------|------------------------------------------------------------------------------------------------|
| [Zn(quin) <sub>2</sub> (thiomorph) <sub>2</sub> ] ( <b>1</b> )                                                              | NH...COO <sup>-</sup>                                                                                             | N...O [1-x, 0.5+y, 1.5-z] = 2.8782(15)                                                         |
| [Zn(quin) <sub>2</sub> (4-Mepipe) <sub>2</sub> ] ( <b>3</b> )                                                               | NH...COO <sup>-</sup><br>NH...COO <sup>-</sup>                                                                    | N...O = 2.9180(17)<br>N...O [1-x, 1-y, 1-z] = 2.9756(18)                                       |
| [Zn(quin) <sub>2</sub> (4-amidepipe) <sub>2</sub> ].2CH <sub>3</sub> CN ( <b>6</b> )                                        | NH <sub>2</sub> ...COO <sup>-</sup><br>NH <sub>2</sub> ...O(amide)                                                | N...O [-1+x, y, z] = 2.912(2)<br>N...O [-x, -y, -z] = 2.916(2)                                 |
| [Zn(quin) <sub>2</sub> (1-Mepz)] ( <b>10</b> )                                                                              | NH...COO <sup>-</sup>                                                                                             | N...O [0.5-x, -0.5+y, 1.5-z] = 2.905(2)                                                        |
| [Zn(quin) <sub>2</sub> (1-Mepz) <sub>2</sub> ].0.5CH <sub>3</sub> CN ( <b>11</b> )                                          | NH...COO <sup>-</sup><br>NH...COO <sup>-</sup><br>NH...COO <sup>-</sup>                                           | N...O = 2.9983(16)<br>N...O = 2.8685(16)<br>N...O = 3.0076(16)                                 |
| [Zn(quin) <sub>2</sub> (1-Etpz) <sub>2</sub> ].0.5CH <sub>3</sub> CN ( <b>13</b> )                                          | NH...COO <sup>-</sup><br>NH...COO <sup>-</sup>                                                                    | N...O = 2.892(2)<br>N...O [x, y, 1+z] = 3.007(2)                                               |
| [Zn(quin) <sub>2</sub> (1-OHEtpz) <sub>2</sub> ].2CH <sub>3</sub> CN ( <b>15</b> )                                          | OH...COO <sup>-</sup><br>NH...OH                                                                                  | O...O = 2.6823(18)<br>N...O [1+x, y, z] = 3.057(2)                                             |
| [Zn(quin) <sub>2</sub> (1-Phpz)].CH <sub>3</sub> CN ( <b>17</b> )                                                           | NH...COO <sup>-</sup><br>NH...COO <sup>-</sup>                                                                    | N...O = 2.9177(15)<br>N...O [1+x, y, z] = 3.0236(14)                                           |
| [Zn(quin) <sub>2</sub> (1-Phpz) <sub>2</sub> ].2acetamide, triclinic ( <b>18a</b> )                                         | NH...O(acetamide)<br>NH <sub>2</sub> (acetamide)...O(acetamide)<br>NH <sub>2</sub> (acetamide)...COO <sup>-</sup> | N...O [-1+x, -1+y, z] = 2.9871(17)<br>N...O [2-x, 2-y, 1-z] = 2.8955(19)<br>N...O = 2.8939(17) |
| [Zn(quin) <sub>2</sub> (1-Phpz) <sub>2</sub> ].2acetamide, monoclinic ( <b>18b</b> )                                        | NH...O(acetamide) <sup>[a]</sup>                                                                                  | N...O = 2.9821(15)                                                                             |
| [Zn(quin) <sub>2</sub> (1-Acpz) <sub>2</sub> ] ( <b>20</b> )                                                                | NH...O(1-Acpz)                                                                                                    | N...O [0.5-x, 0.5+y, 1.5-z] = 2.9130(14)                                                       |
| [Zn(quin) <sub>2</sub> (1-Acpz) <sub>2</sub> ].2CH <sub>3</sub> CN, triclinic ( <b>21a</b> )                                | NH...COO <sup>-</sup><br>NH...COO <sup>-</sup>                                                                    | N...O = 2.903(2)<br>N...O [x, y, 1+z] = 2.977(2)                                               |
| [Zn(quin) <sub>2</sub> (1-Acpz) <sub>2</sub> ].2CH <sub>3</sub> CN, monoclinic ( <b>21b</b> )                               | NH...COO <sup>-</sup>                                                                                             | N...O [1-x, 2-y, 1-z] = 2.944(2)                                                               |
| [Zn(quin) <sub>2</sub> (1-Acpz) <sub>2</sub> ].[Zn(quin) <sub>2</sub> (pz)] <sub>n</sub> .4CH <sub>3</sub> CN ( <b>22</b> ) | NH...COO <sup>-</sup><br>NH...O(1-Acpz)                                                                           | N...O [-1+x, y, z] = 2.910(2)<br>N...O = 3.028(2)                                              |

<sup>[a]</sup> Contact NH<sub>2</sub>(acetamide)...COO<sup>-</sup> (3.0704(17) Å) is longer than the sum of van der Waals radii.<sup>S2</sup>

<sup>S2</sup> Bondi, A. J. *Phys. Chem.* **1964**, *68*, 441–451, doi:10.1021/j100785a001.

**Table S9.** Hydrogen bond parameters for compounds with coordinated amidines [Å].

| Compound                                                                                 | Hydrogen bond                                                                                    | Donor...acceptor                                                                                       |
|------------------------------------------------------------------------------------------|--------------------------------------------------------------------------------------------------|--------------------------------------------------------------------------------------------------------|
| [Zn(quin) <sub>2</sub> (thiomorpham)]·CH <sub>3</sub> CN·CH <sub>3</sub> OH ( <b>2</b> ) | OH(CH <sub>3</sub> OH)···COO <sup>-</sup><br>NH···COO <sup>-</sup>                               | O···O [x, 1+y, z] = 2.690(2)<br>N···O [-1+x, y, z] = 2.9473(17)                                        |
| [Zn(quin) <sub>2</sub> (4-Mepipeam)]·CH <sub>3</sub> CN ( <b>5</b> )                     | NH···COO <sup>-</sup>                                                                            | N···O [-1+x, y, z] = 3.0239(16)                                                                        |
| [Zn(quin) <sub>2</sub> (1-Mepzam)] ( <b>12</b> )                                         | NH···COO <sup>-</sup>                                                                            | N···O [-1+x, y, z] = 2.991(2)                                                                          |
| [Zn(quin) <sub>2</sub> (1-Etpzam)]·H <sub>2</sub> O ( <b>14</b> )                        | NH···COO <sup>-</sup><br>OH(H <sub>2</sub> O)···COO <sup>-</sup><br>OH(H <sub>2</sub> O)···N(pz) | N···O [-1+x, y, z] = 3.012(3)<br>O···O [1-x, -0.5+y, 1.5-z] = 2.783(4)<br>O···N [1+x, y, z] = 2.970(4) |
| [Zn(quin) <sub>2</sub> (1-OHEtpzam)] ( <b>16</b> )                                       | NH···COO <sup>-</sup><br>OH(pz)···COO <sup>-</sup>                                               | N···O [-1+x, y, z] = 2.974(3)<br>O···O [-1+x, 1+y, z] = 2.735(3)                                       |
| [Zn(quin) <sub>2</sub> (1-Phpzam)]·0.5(1-Phpz)·CH <sub>3</sub> CN ( <b>19</b> )          | NH···COO <sup>-</sup>                                                                            | N···O [1+x, y, z] = 3.0533(17)                                                                         |
| [Zn(quin) <sub>2</sub> (am)]·1.3CH <sub>3</sub> CN·0.2H <sub>2</sub> O ( <b>23</b> )     | NH···COO <sup>-</sup><br>NH <sub>2</sub> ···COO <sup>-</sup>                                     | N···O [-1+x, y, z] = 2.928(2)<br>N···O [x, 1+y, z] = 2.862(3)                                          |

**Figure S15.** Hydrogen bonding pattern in  $[\text{Zn}(\text{quin})_2(4\text{-Mepipe})_2]$  (**3**). The  $\text{N-H}\cdots\text{COO}^-$  bonds link the complex molecules into supramolecular chains that run along the  $c$ -axis. A section of a chain is shown.

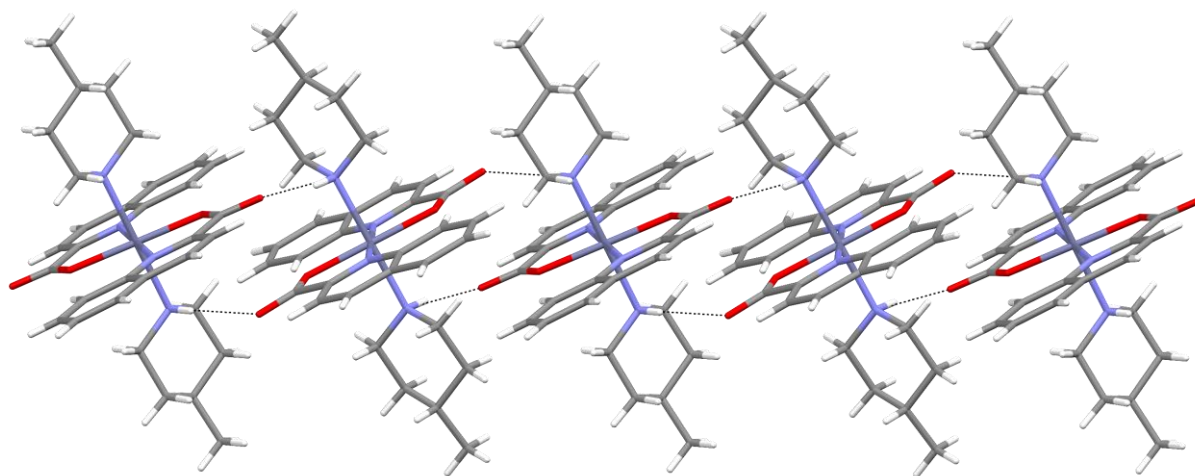

**Figure S16.** Hydrogen bonding pattern in  $[\text{Zn}(\text{quin})_2(1\text{-Mepz})]$  (**10**). The  $\text{N-H}\cdots\text{COO}^-$  bonds link the complex molecules into supramolecular chains that run along the  $b$ -axis. A section of a chain is shown.

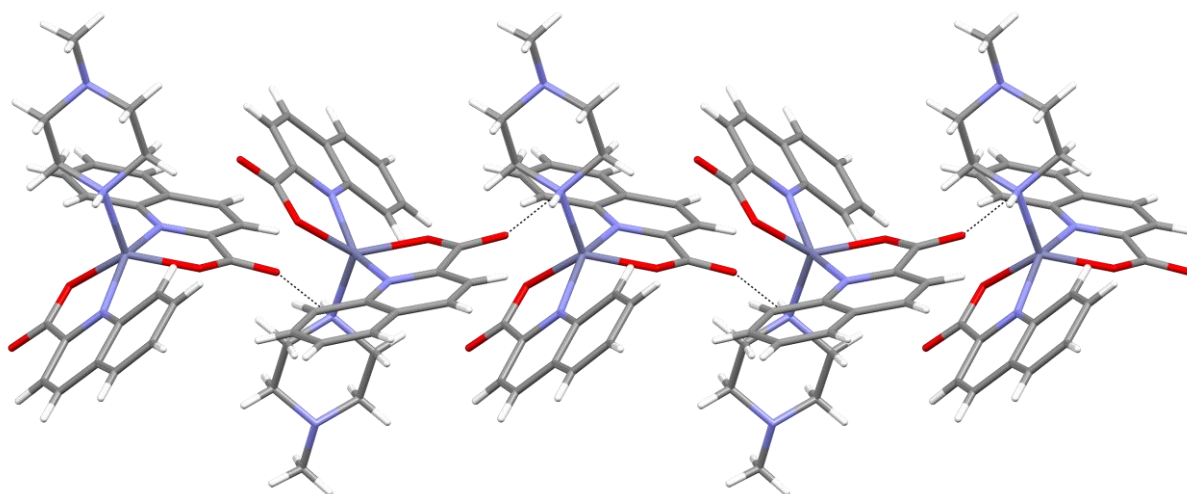

**Figure S17.** Hydrogen bonding pattern in 4-carboxamidopiperidinoacetamide (**8**). The  $\text{NH}_2(\text{amine})\cdots\text{NH}(\text{imine})$  ( $\text{N}\cdots\text{N} = 2.961(2) \text{ \AA}$ ) and  $\text{NH}_2(\text{amine})\cdots\text{O}(\text{carbonyl})$  ( $\text{N}\cdots\text{O} = 2.935(2) \text{ \AA}$ ) bonds link the molecules into supramolecular layers (top). Stacking of such layers is shown in the bottom figure.

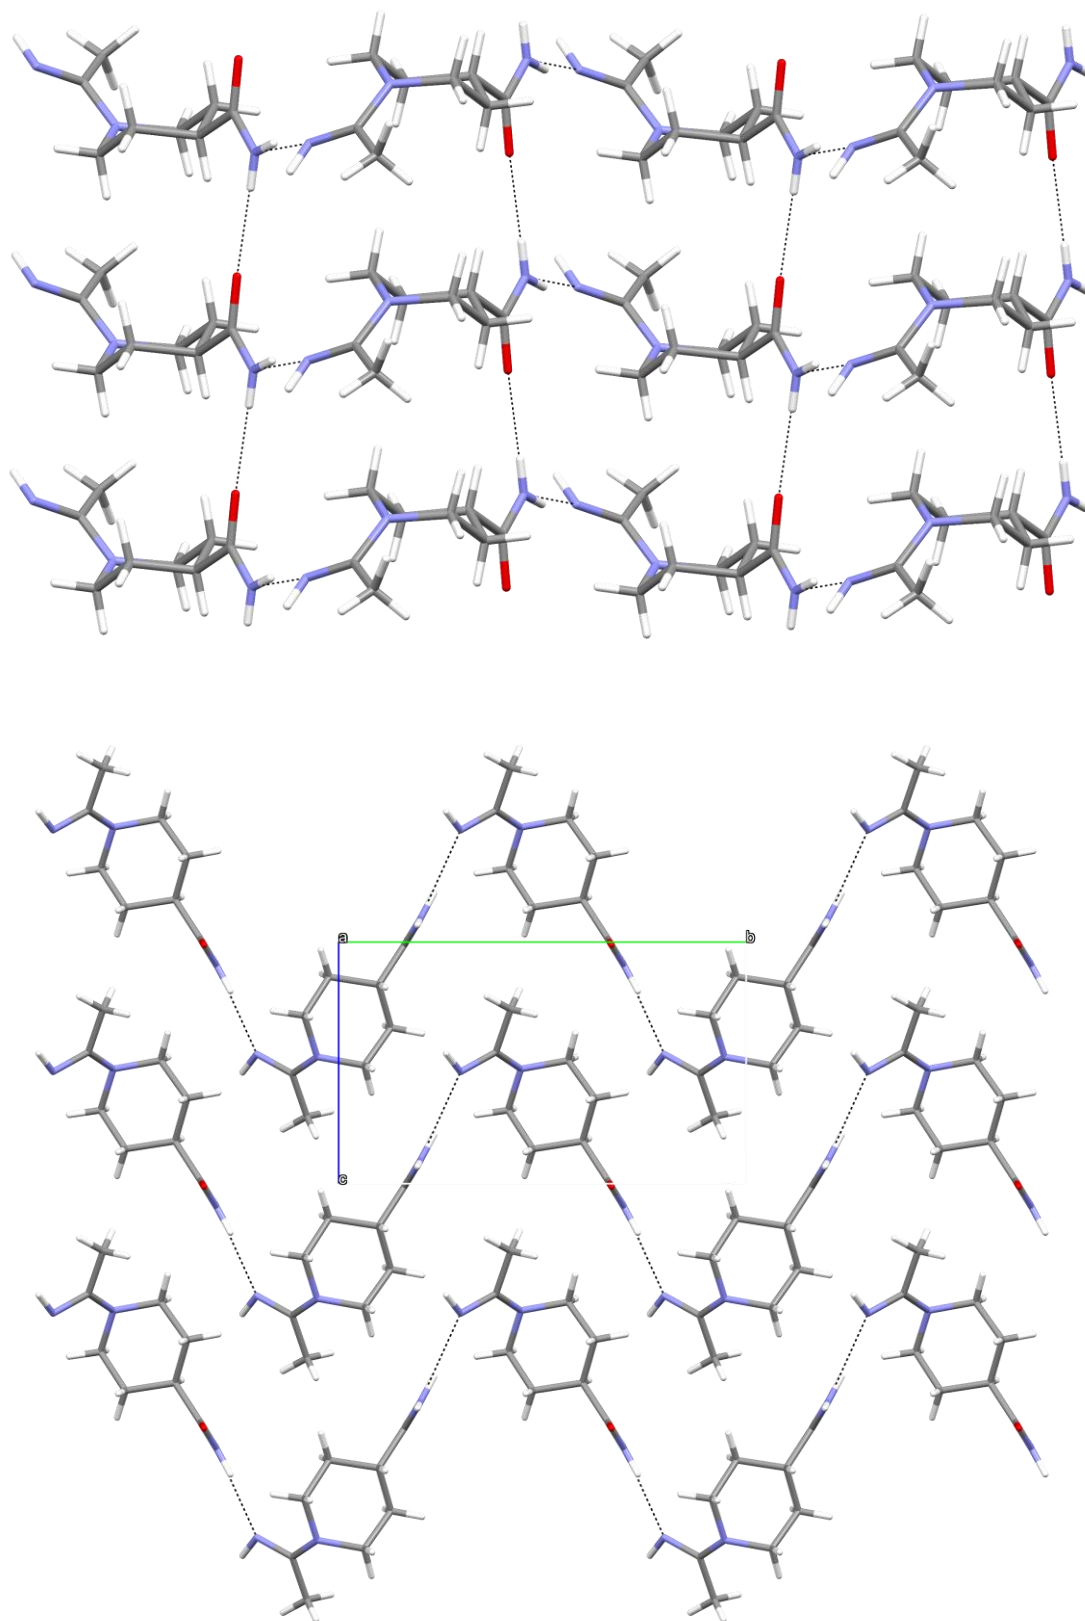

**Figure S18.** Hydrogen bonding pattern in  $[\text{Zn}(\text{quin})_2(1\text{-Etpzam})]\cdot\text{H}_2\text{O}$  (**14**). A section of a layer of hydrogen bonded complex molecules and water is shown.

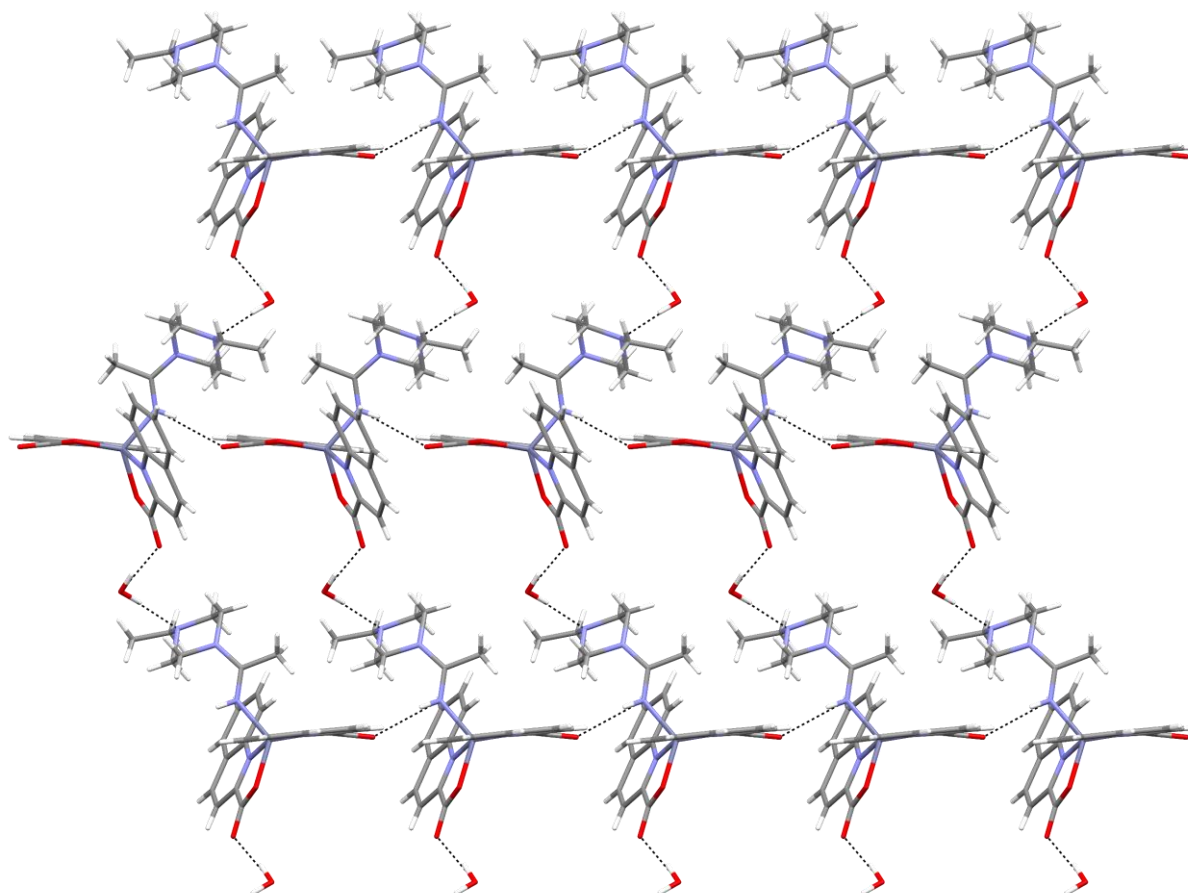



**Figure S19.** Differences in the crystal structures of the  $[\text{Zn}(\text{quin})_2(1\text{-Phpz})_2]\cdot 2\text{acetamide}$  polymorphs: packing in **18a** (top) and **18b** (bottom). The complex molecules are colored gray and acetamide is colored red.

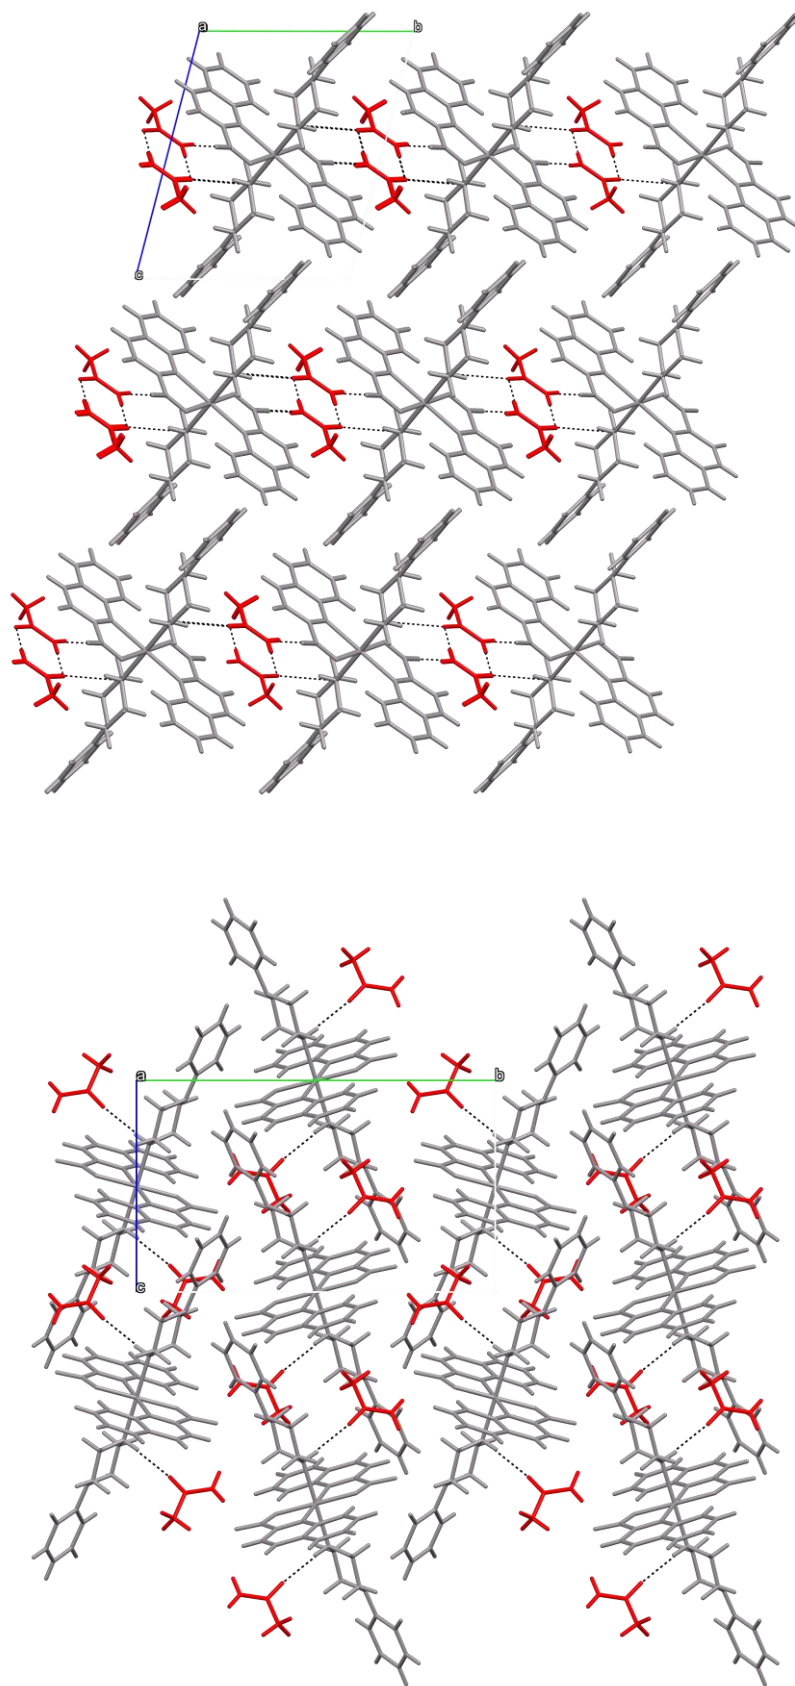

**Figure S20.** Hydrogen bonding in  $[\text{Zn}(\text{quin})_2(1\text{-Acpz})_2]$  (**20**). A section of a layer is shown. The resulting cyclic motif is denoted in graph set notation as  $R_4^4(32)$ .<sup>53</sup>

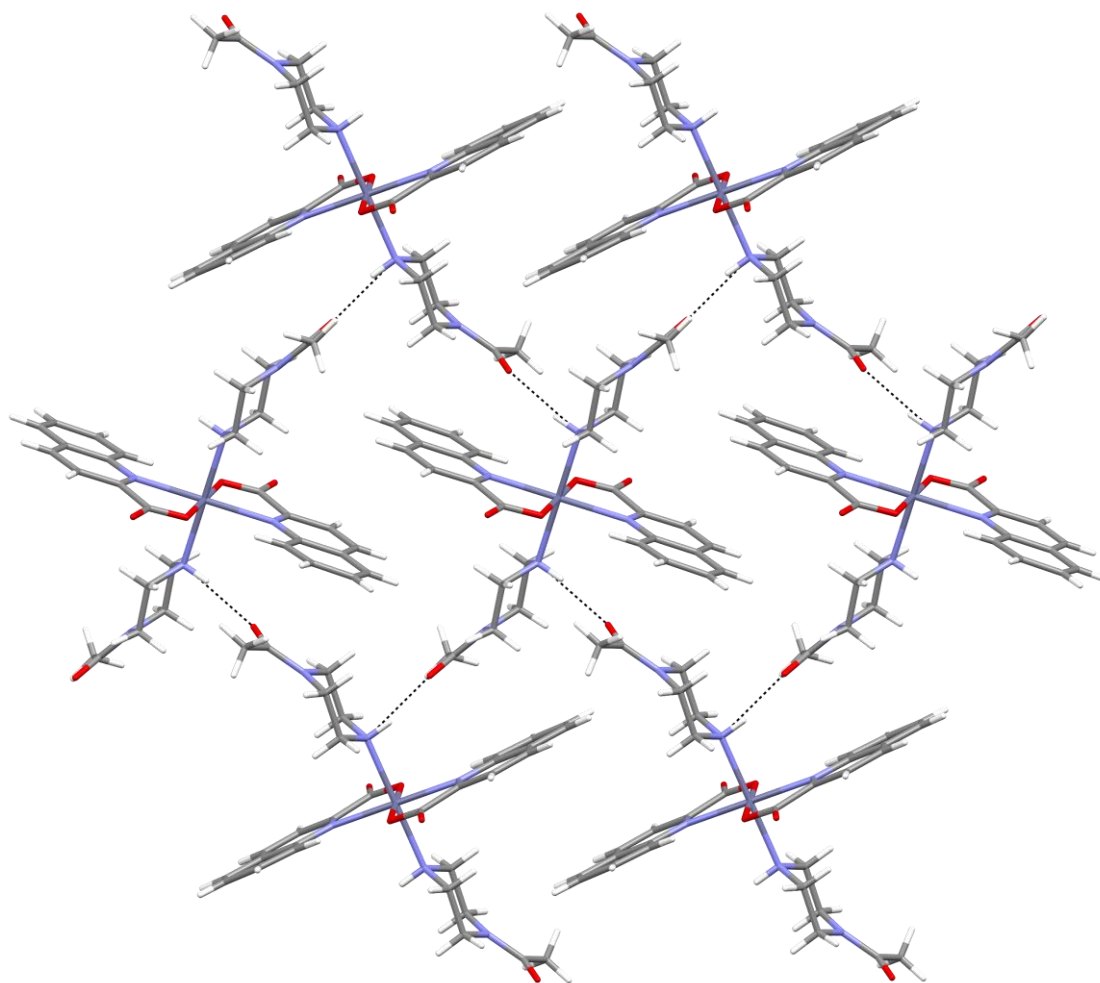

<sup>53</sup> Etter, M.C.; MacDonald, J.C.; Bernstein, J. *Acta Crystallogr., Sect. B* **1990**, *46*, 256–262, doi:10.1107/S0108768189012929.

**Figure S21.** Differences in the crystal structures of the  $[\text{Zn}(\text{quin})_2(1\text{-Acpz})_2]\cdot 2\text{CH}_3\text{CN}$  polymorphs: a perpendicular view of the chains in **21a** (top) and **21b** (bottom). In **21a**, the molecules constituting the chains are arranged in two different directions. In contrast, in **21b**, the molecules are fully aligned. The complex molecules are colored gray and acetonitrile is colored red.

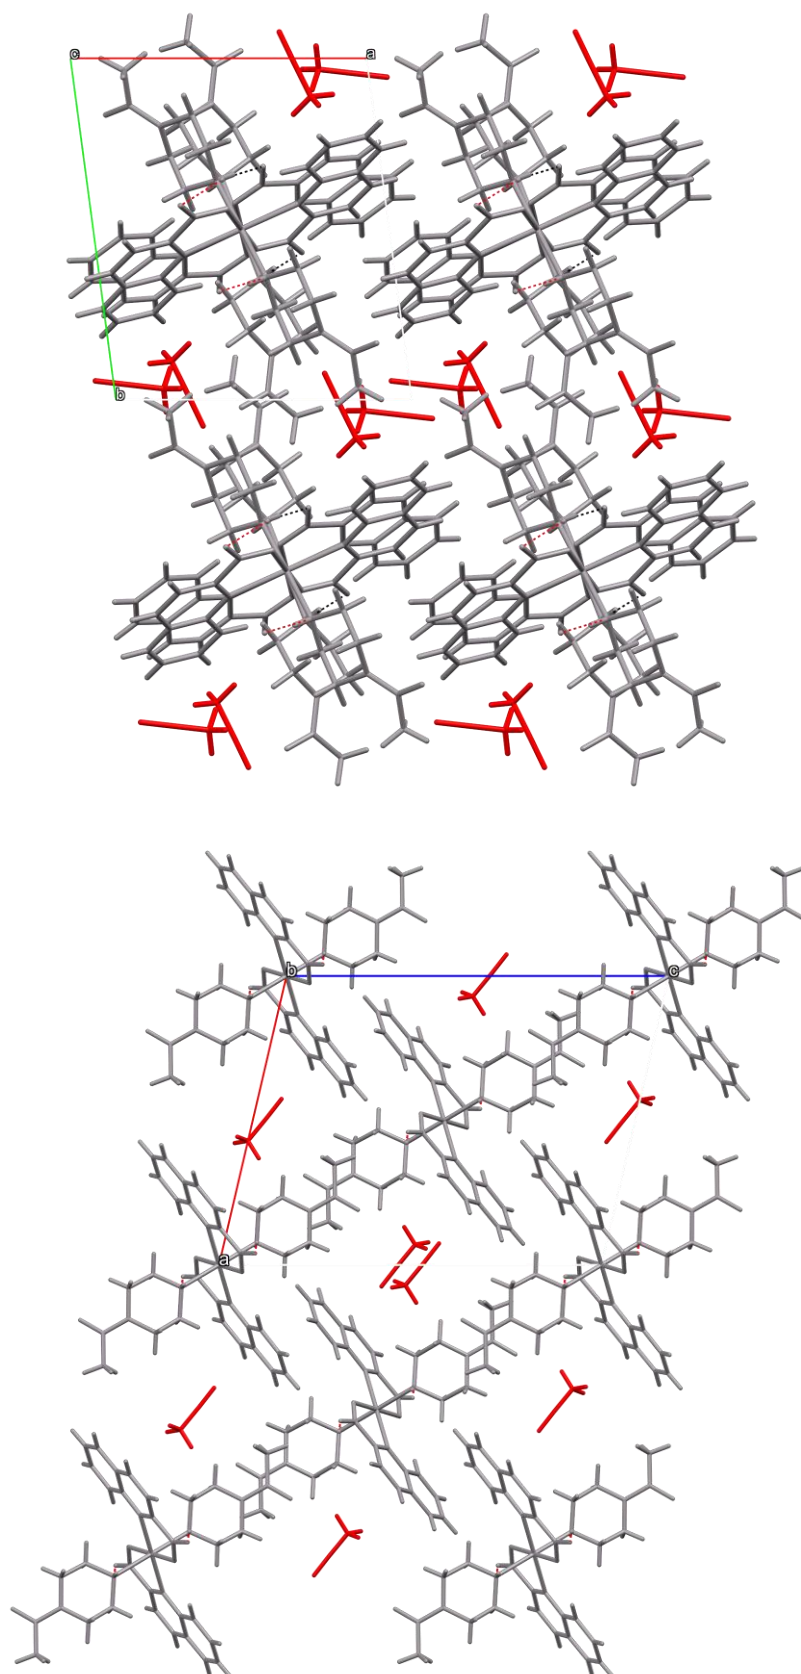

**Figure S22.** Hydrogen bonding pattern in  $[\text{Zn}(\text{quin})_2(1\text{-Acpz})_2] \cdot [\text{Zn}(\text{quin})_2(\text{pz})]_n \cdot 4\text{CH}_3\text{CN}$  (**22**). A section of a layer is shown. The  $[\text{Zn}(\text{quin})_2(1\text{-Acpz})_2]$  complex molecules are colored gray and the one-dimensional polymer  $[\text{Zn}(\text{quin})_2(\text{pz})]_n$  is colored blue. Acetonitrile molecules are not drawn.

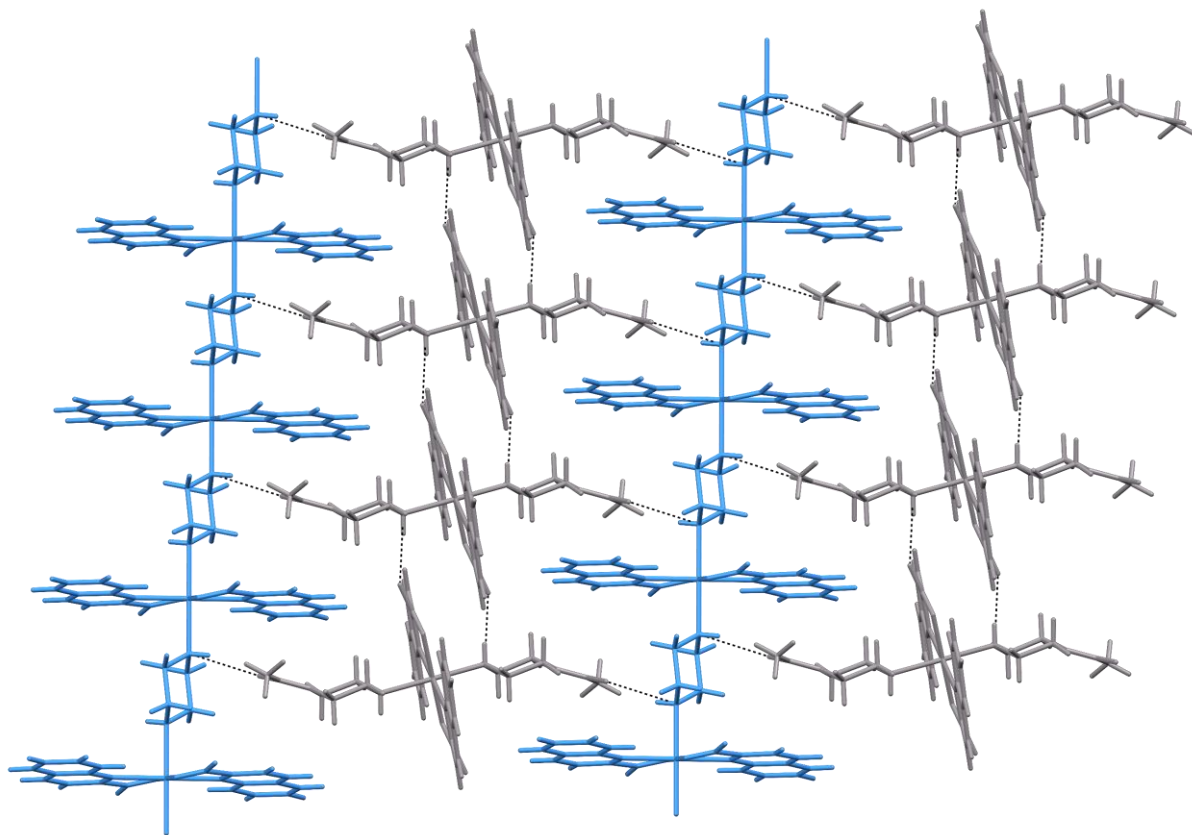

**Figure S23.** Hydrogen bonding pattern in  $[\text{Zn}(\text{quin})_2(\text{am})]\cdot 1.3\text{CH}_3\text{CN}\cdot 0.2\text{H}_2\text{O}$  (**23**). Hydrogen bonds of two types ( $\text{NH}\cdots\text{COO}^-$  and  $\text{NH}_2\cdots\text{COO}^-$ ) link complex molecules into supramolecular layers. The resulting cyclic motif is denoted in graph set notation as  $R_4^4(26)$ .<sup>53</sup> The layers stack along the *c*-axis. Solvent molecules are located in the channels that form.

(i) A perpendicular view of a section of a layer. Solvent molecules are not drawn.

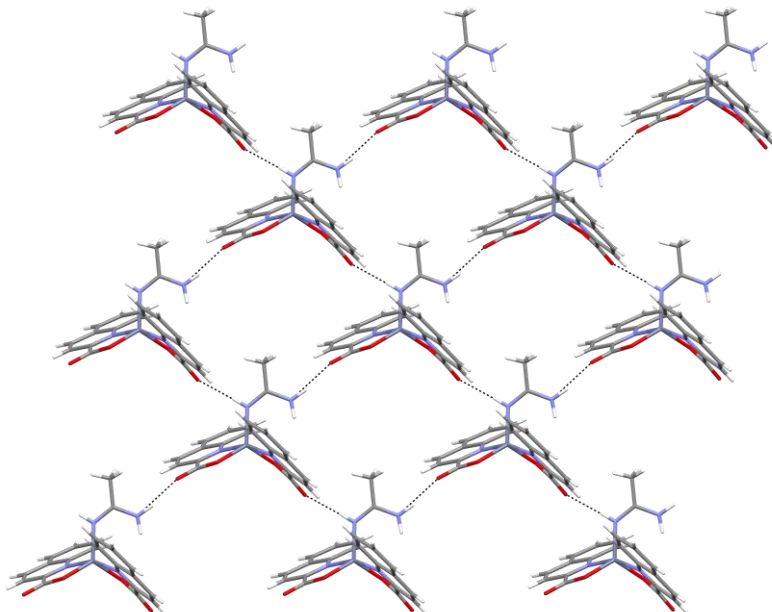

(ii) A view along the layers. Complex molecules are colored gray, acetonitrile red and water is colored blue.

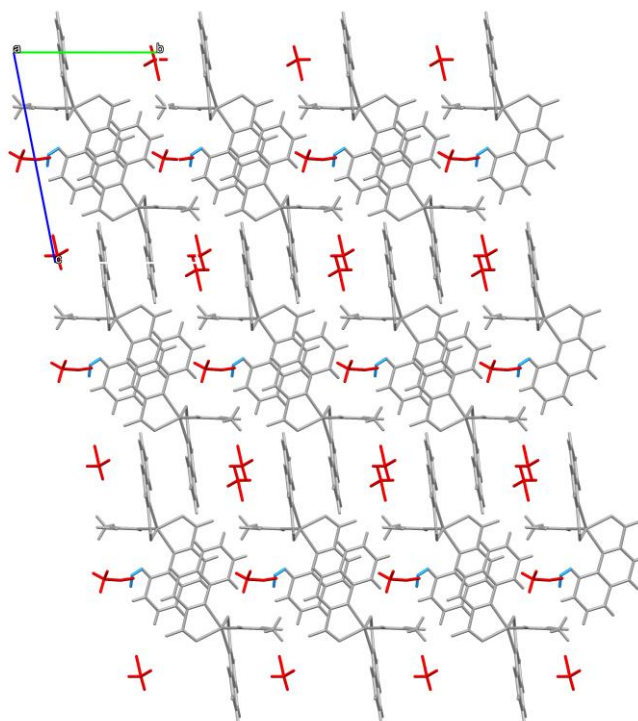

<sup>53</sup> Etter, M.C.; MacDonald, J.C.; Bernstein, J. *Acta Crystallogr., Sect. B* **1990**, *46*, 256–262, doi:10.1107/S0108768189012929.

### 3. Infrared spectroscopy

Figure S24. Infrared spectrum of  $[\text{Zn}(\text{quin})_2(\text{thiomorph})_2]$  (**1**).

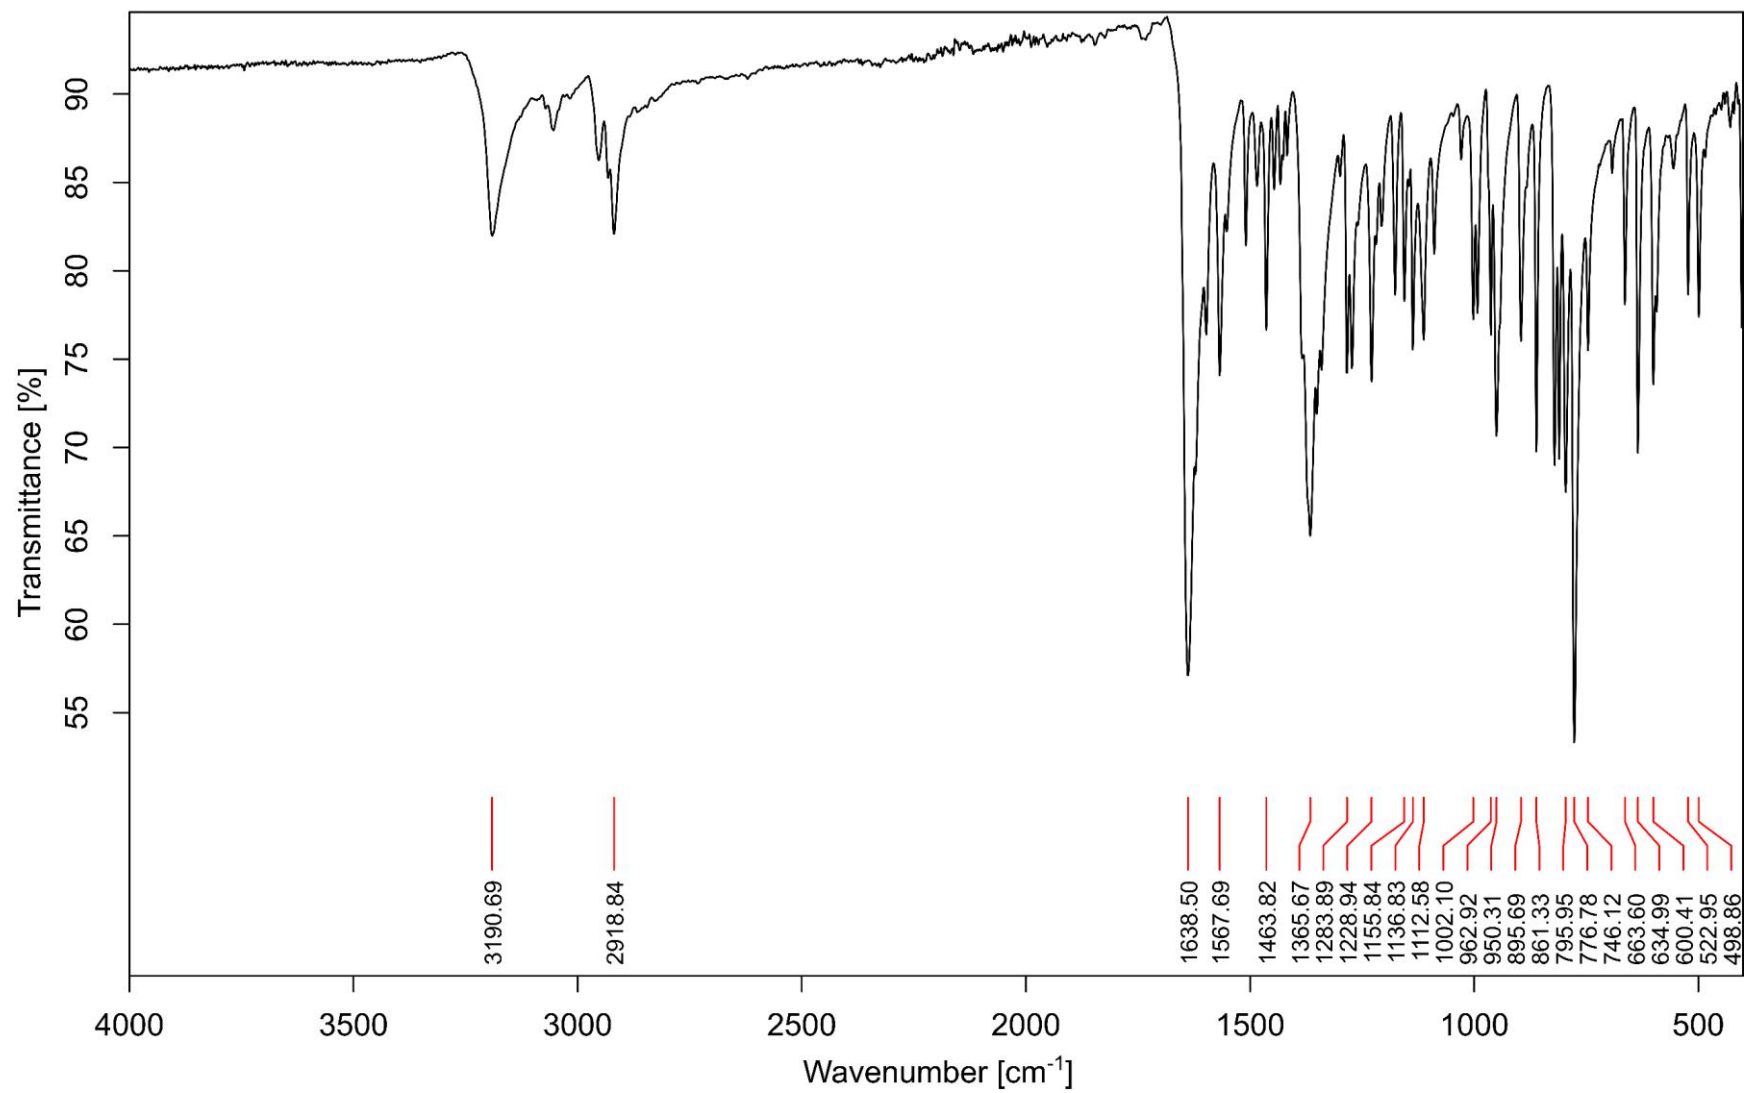

Figure S25. Infrared spectrum of  $[\text{Zn}(\text{quin})_2(\text{thiomorpham})] \cdot \text{CH}_3\text{OH} \cdot \text{CH}_3\text{CN}$  (**2**).

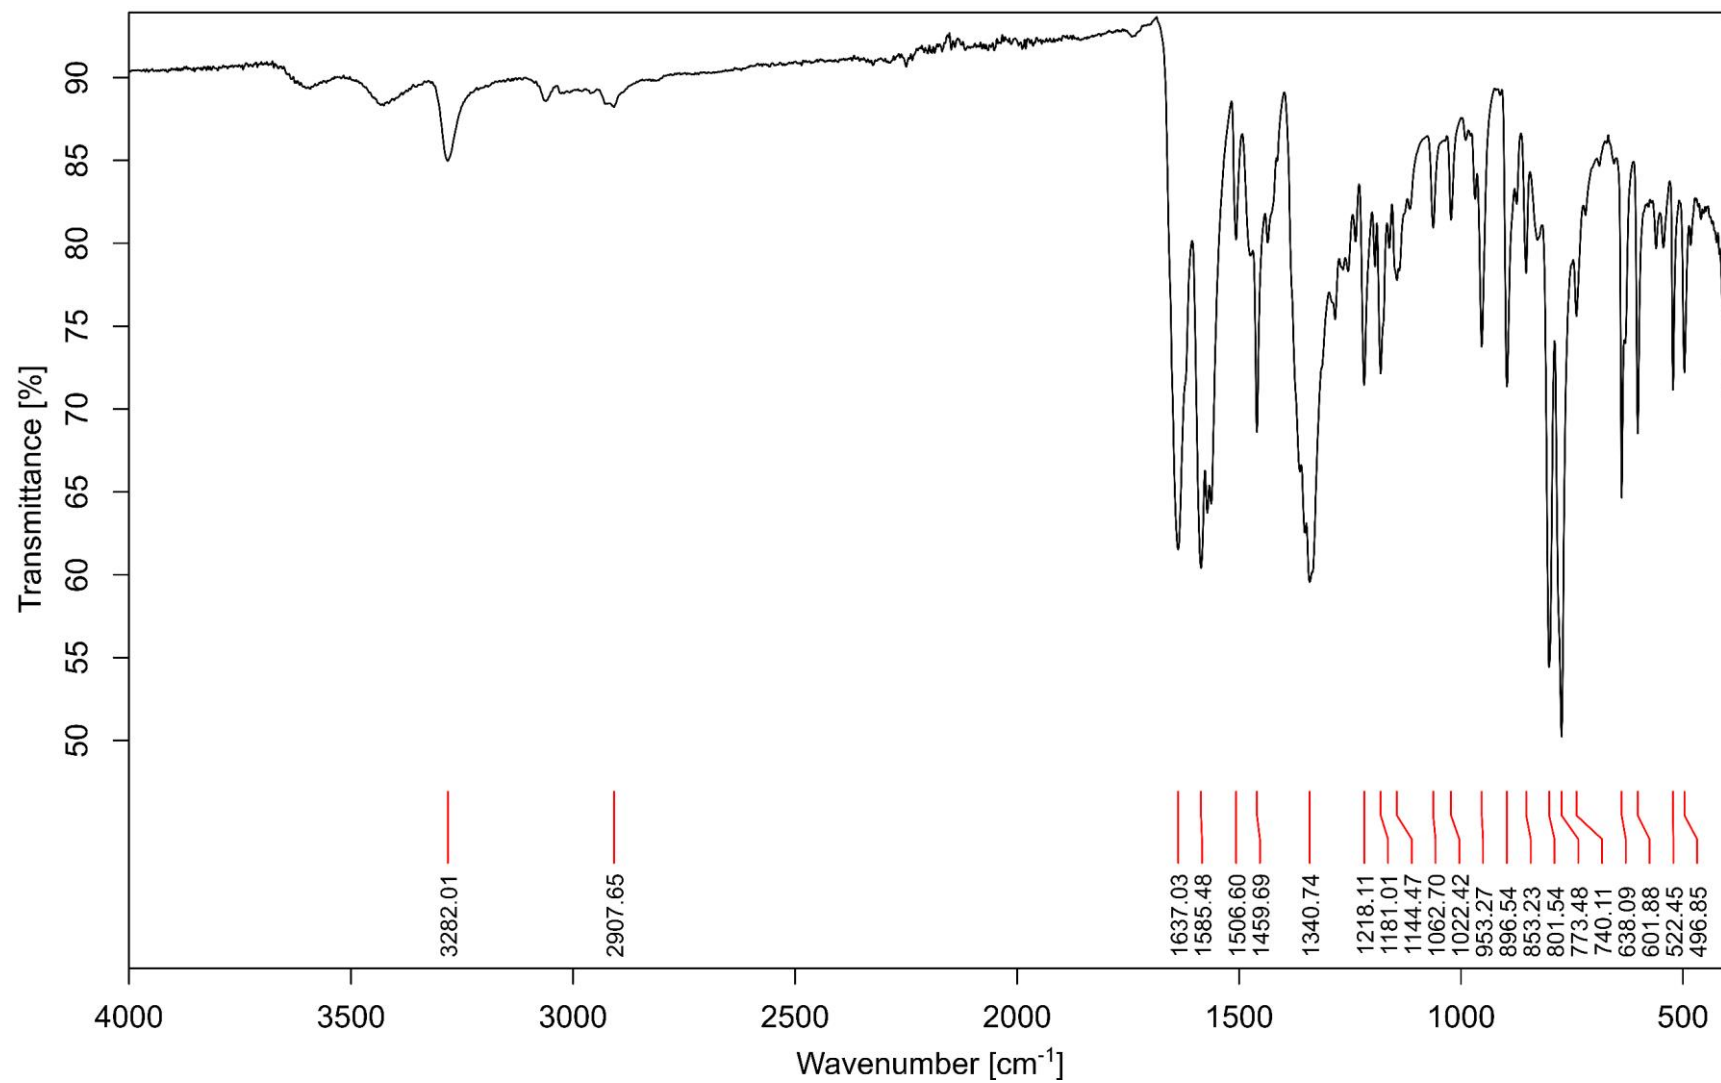

Figure S26. Infrared spectrum of  $[\text{Zn}(\text{quin})_2(4\text{-Mepipe})_2]$  (**3**).

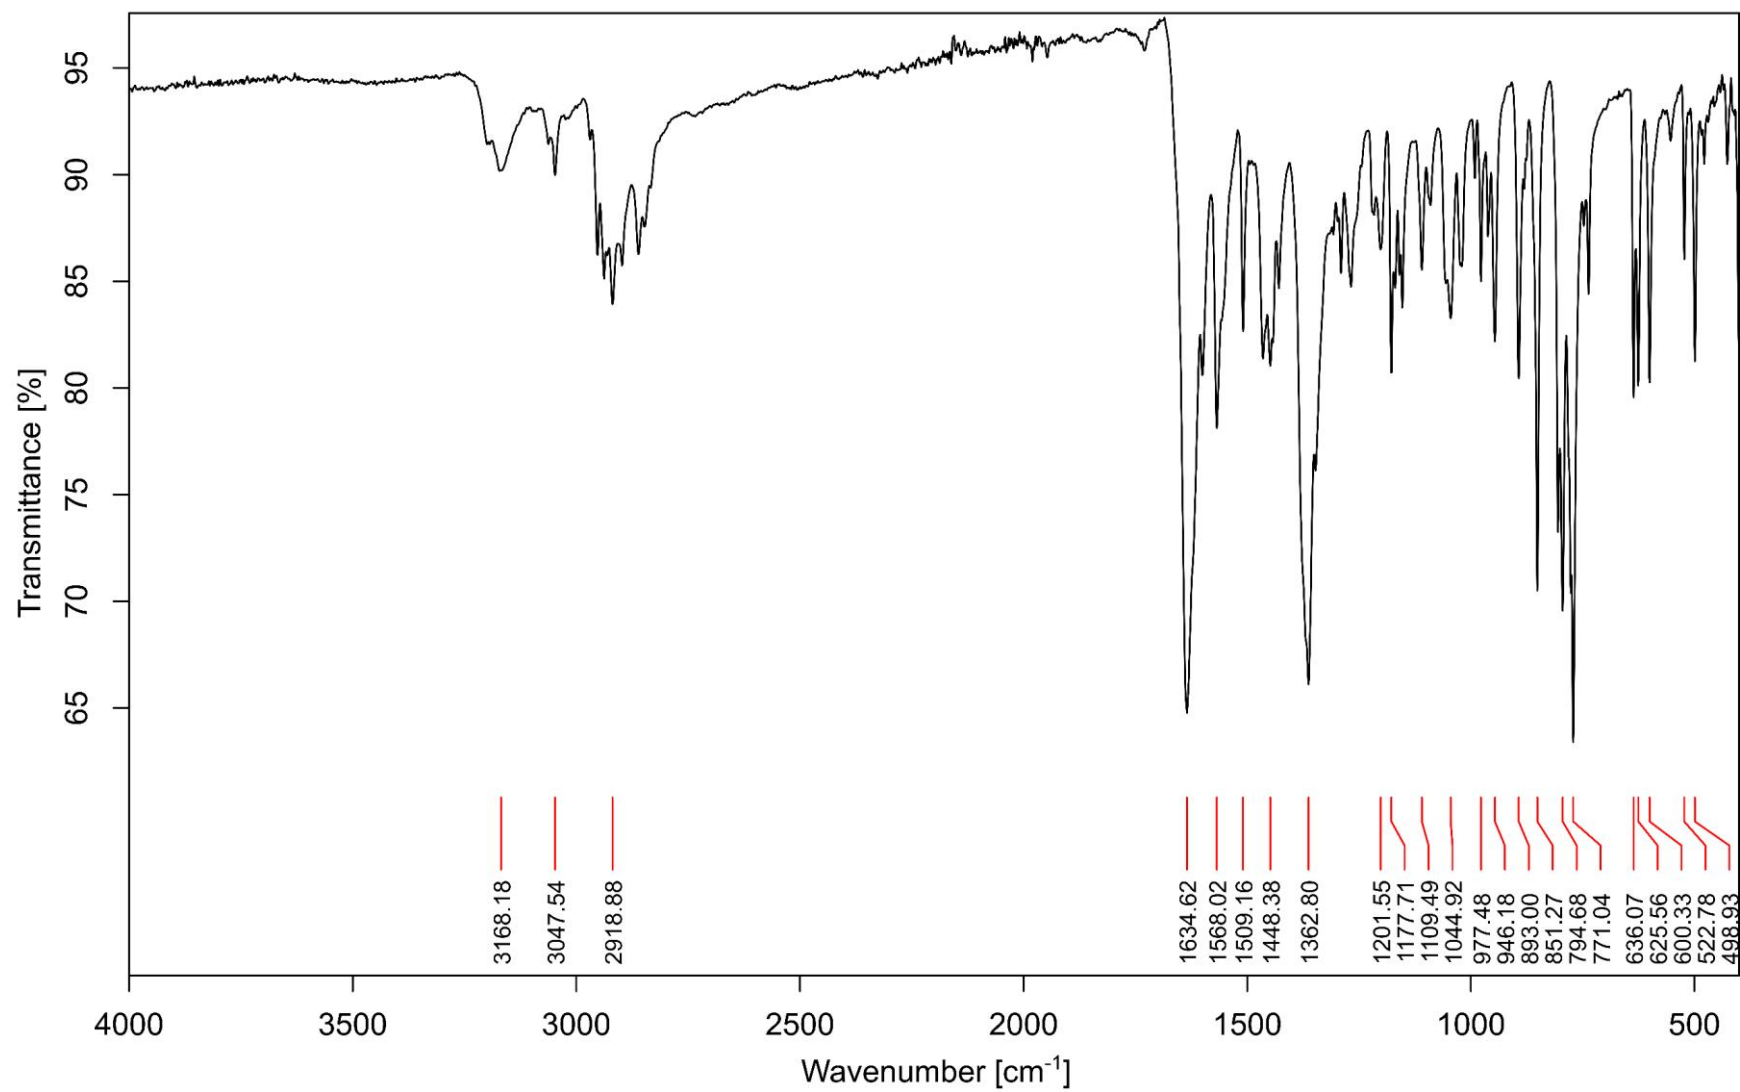



Figure S27. Infrared spectrum of 4-MepipeH[Zn(quin)<sub>3</sub>] (**4**).

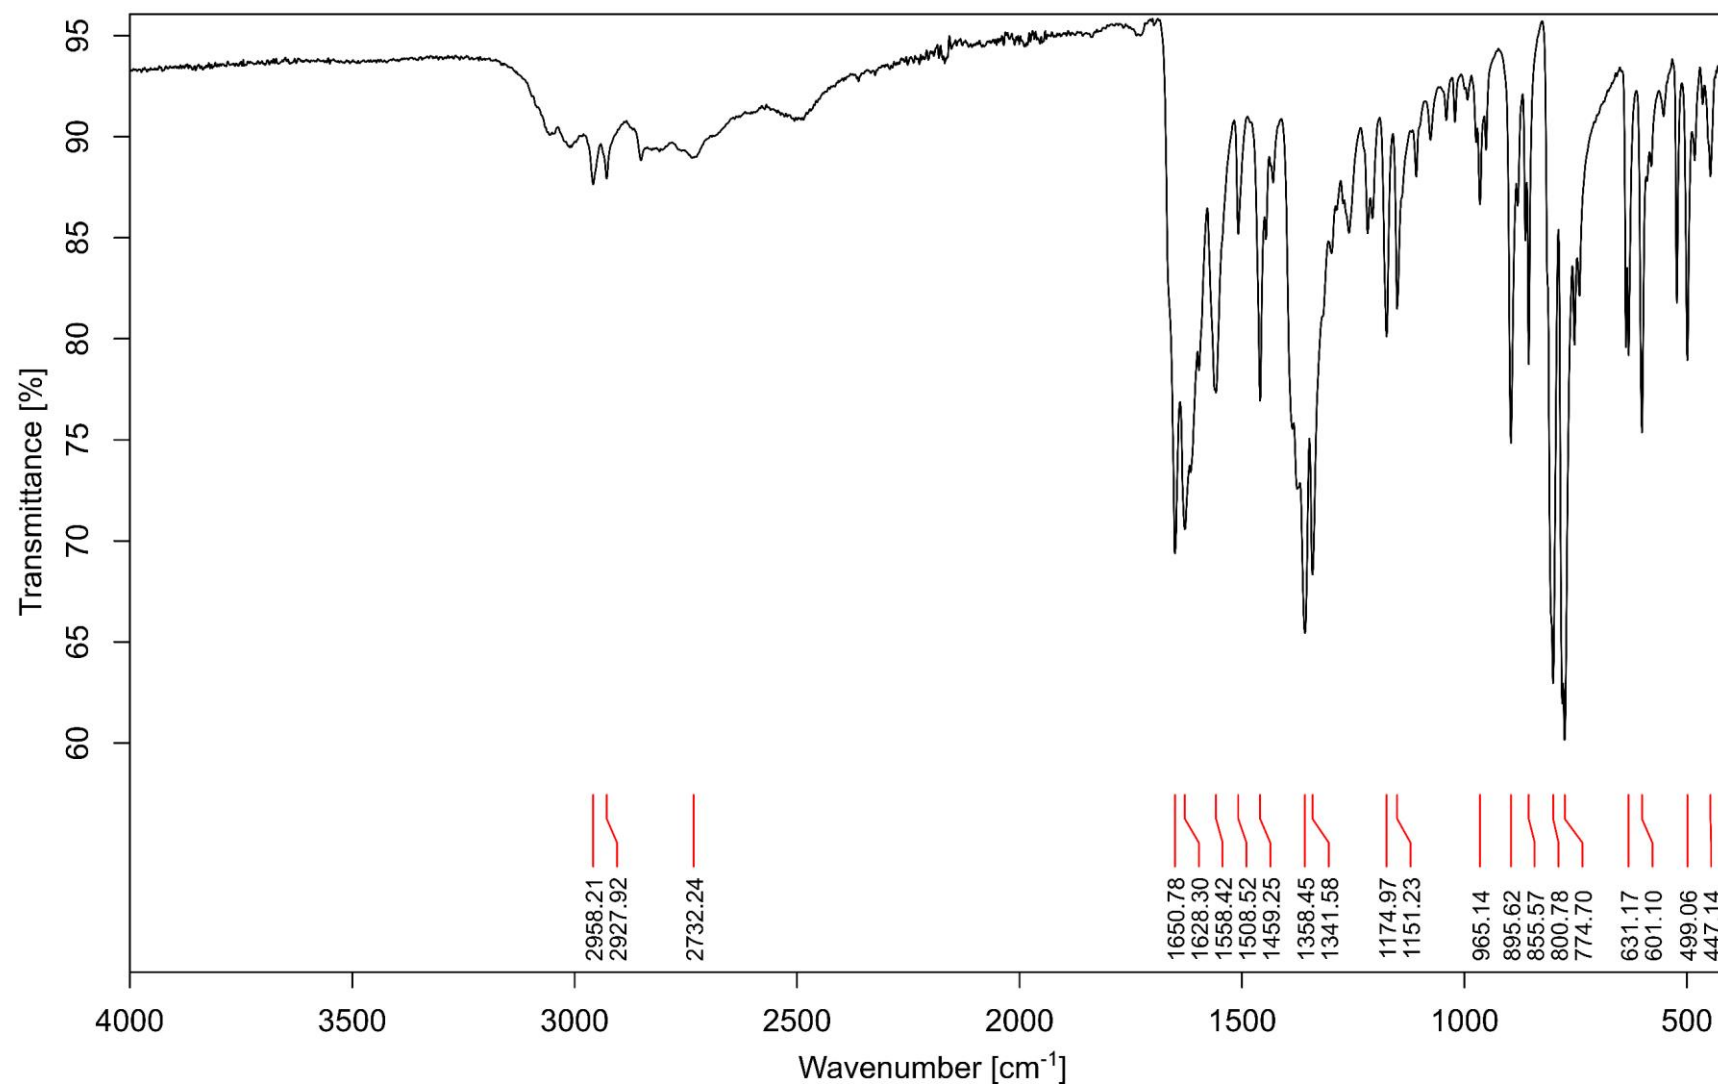

**Figure S28.** Infrared spectrum of  $[\text{Zn}(\text{quin})_2(4\text{-Mepipeam})]\cdot\text{CH}_3\text{CN}$  (**5**).

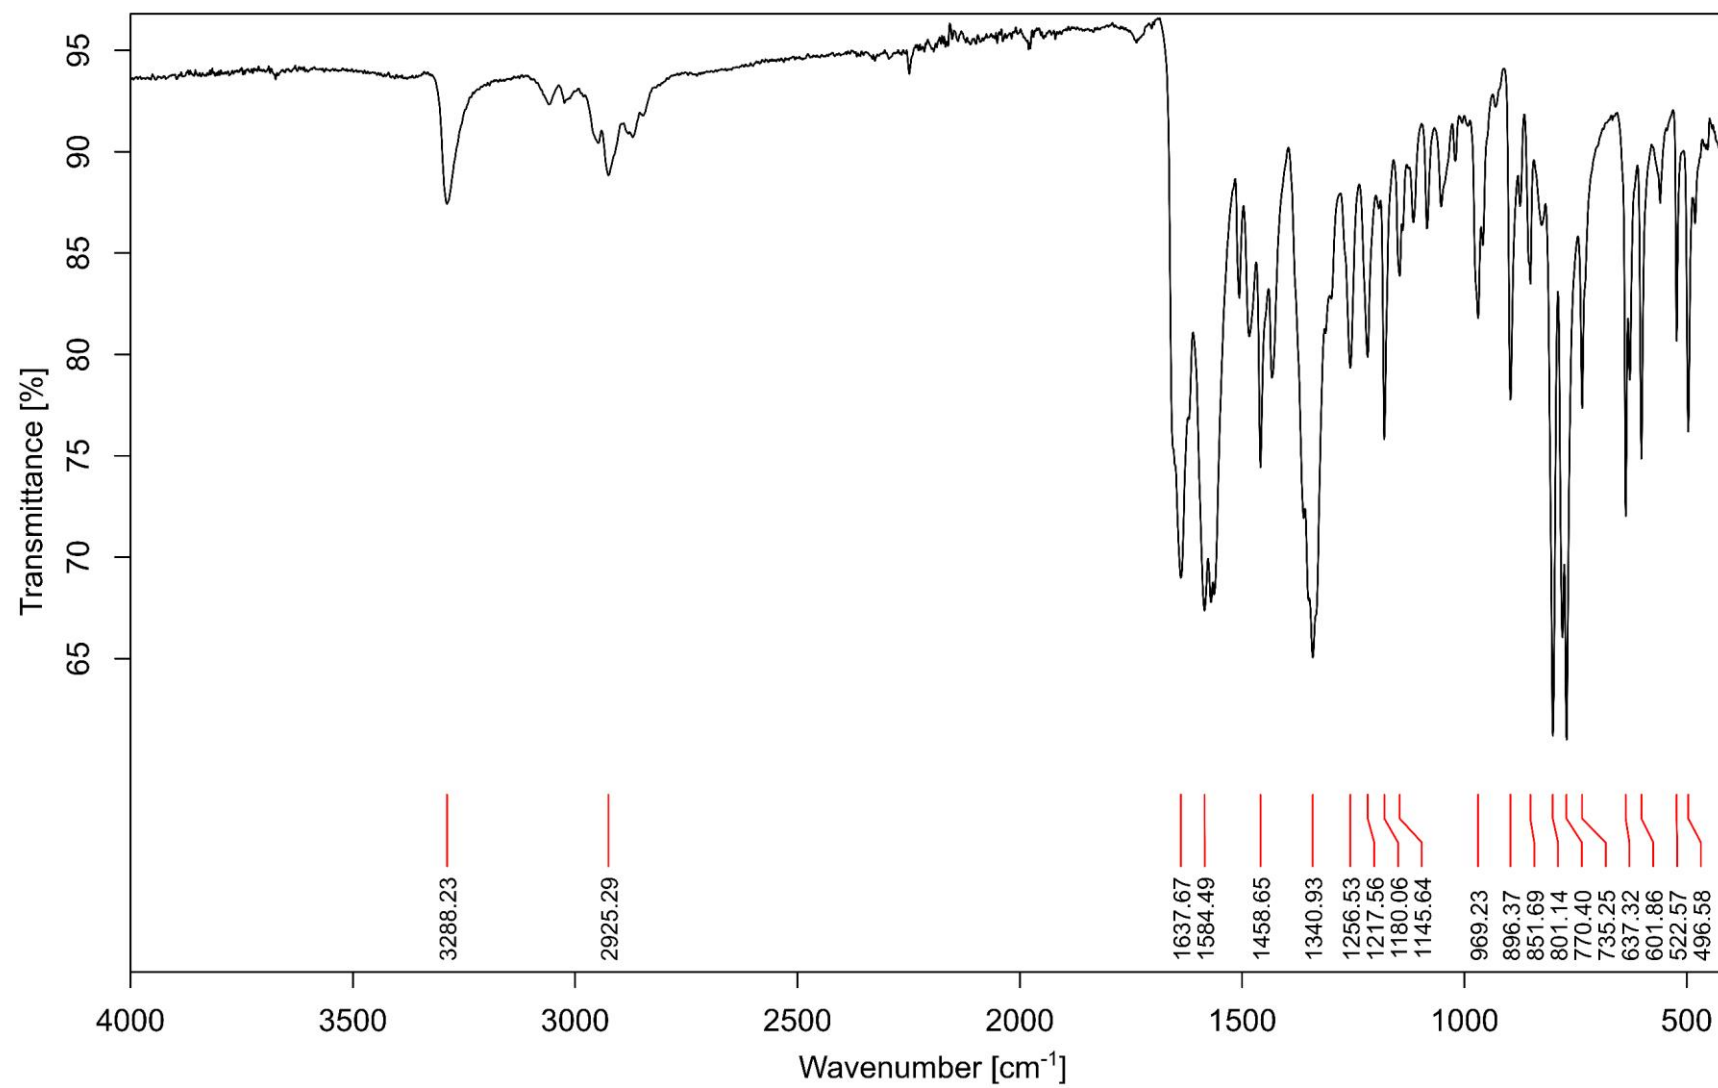

Figure S29. Infrared spectrum of  $[\text{Zn}(\text{quin})_2(4\text{-amidepipe})_2] \cdot 2\text{CH}_3\text{CN}$  (**6**).

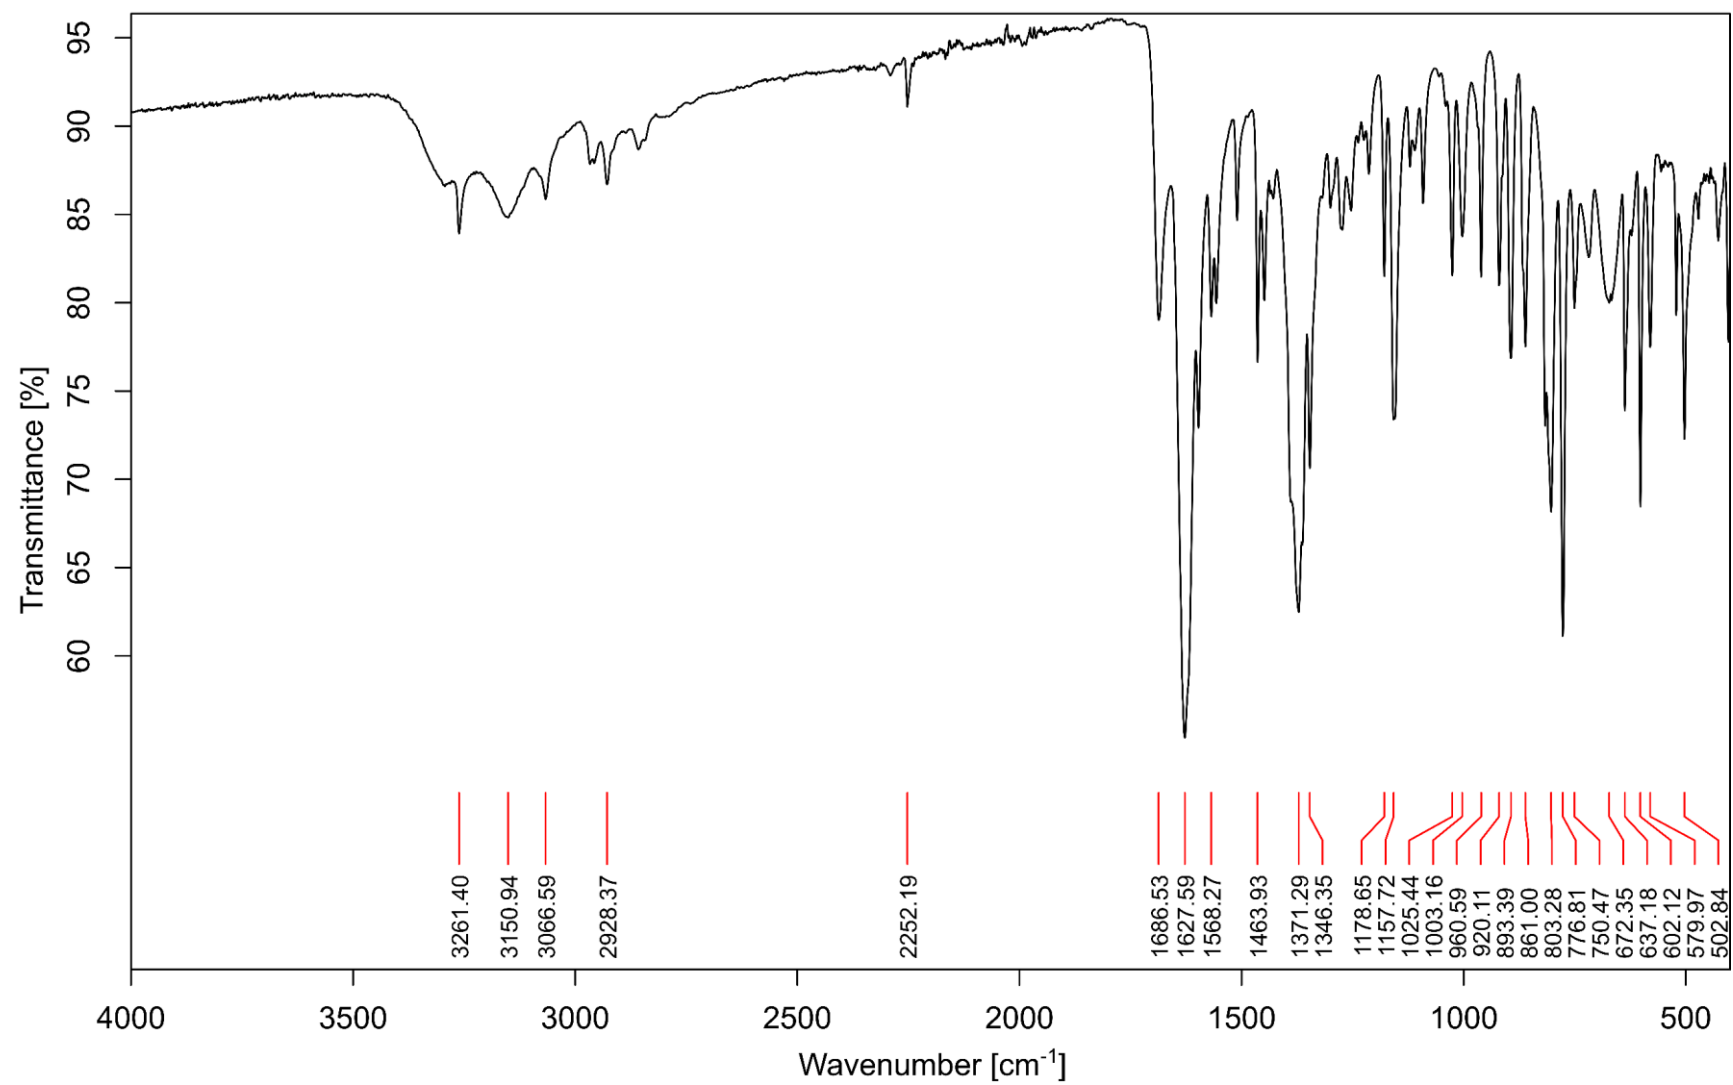

Figure S30. Infrared spectrum of [Zn(quin)<sub>2</sub>(4-amidepipeam)] (7).

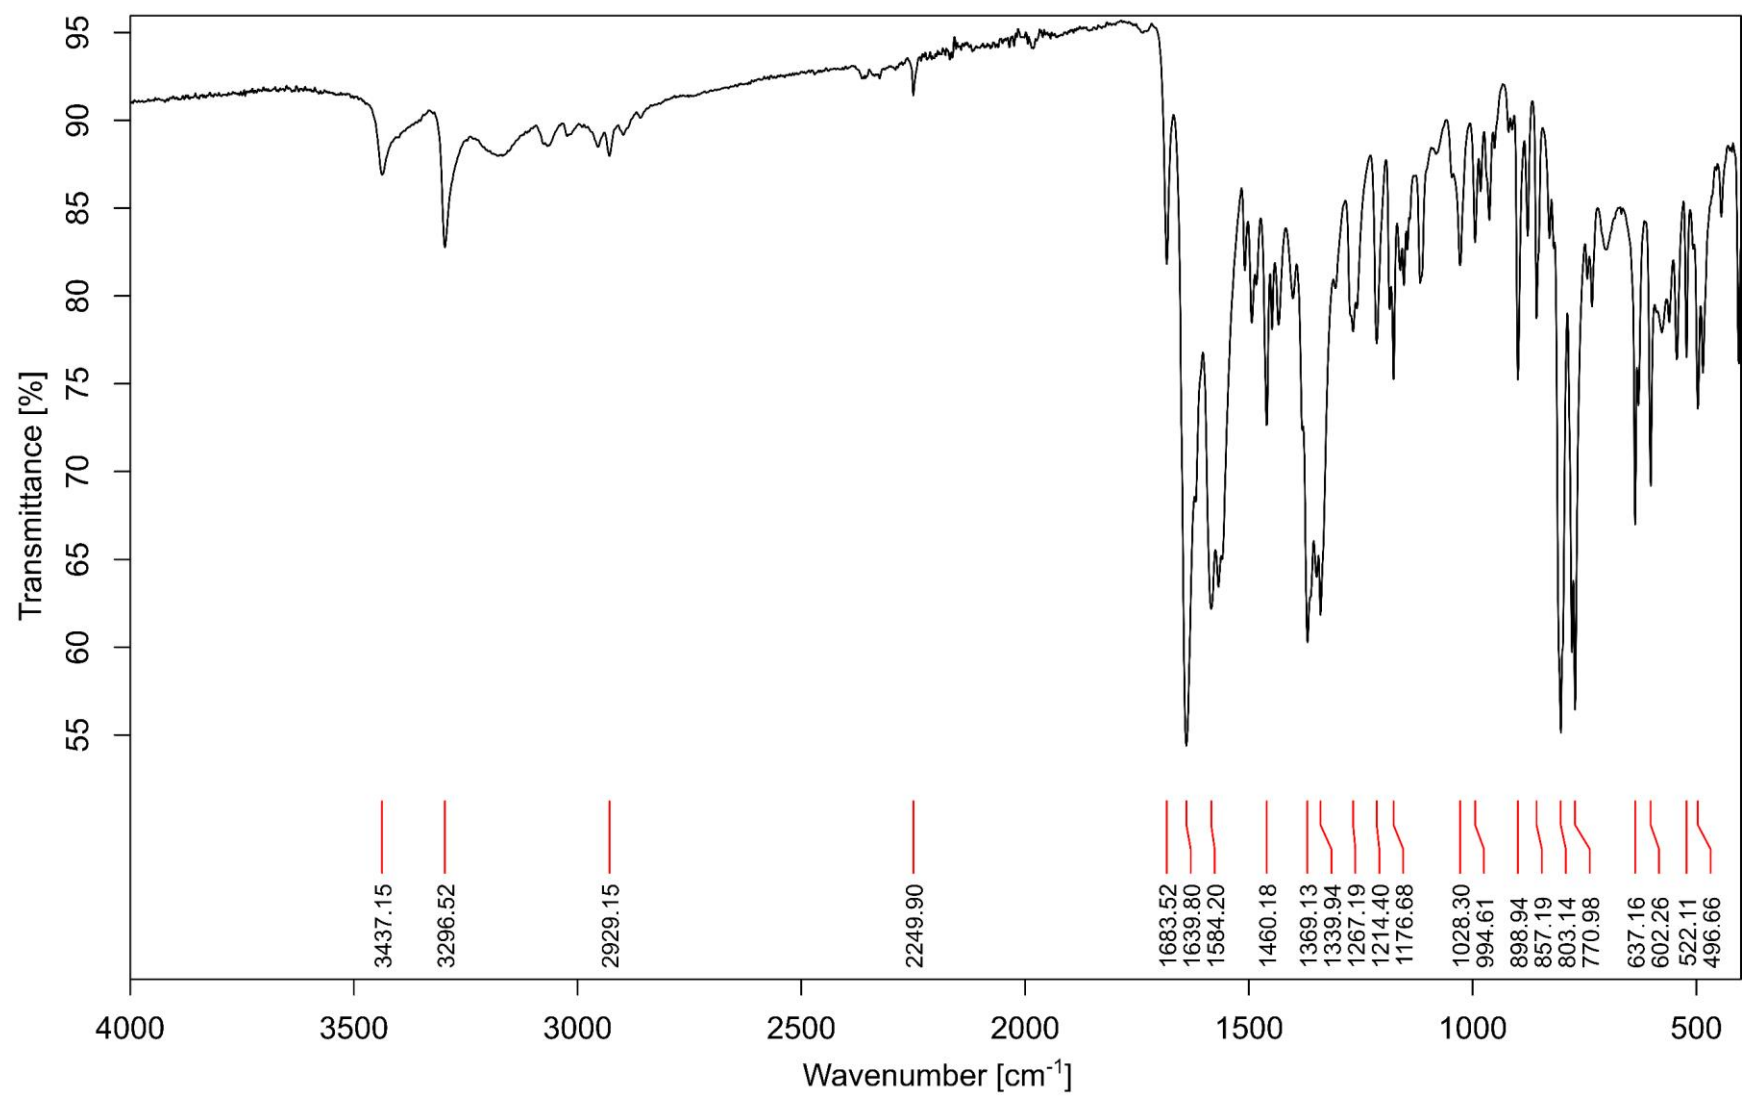

Figure S31. Infrared spectrum of 4-amidepipeam (**8**).

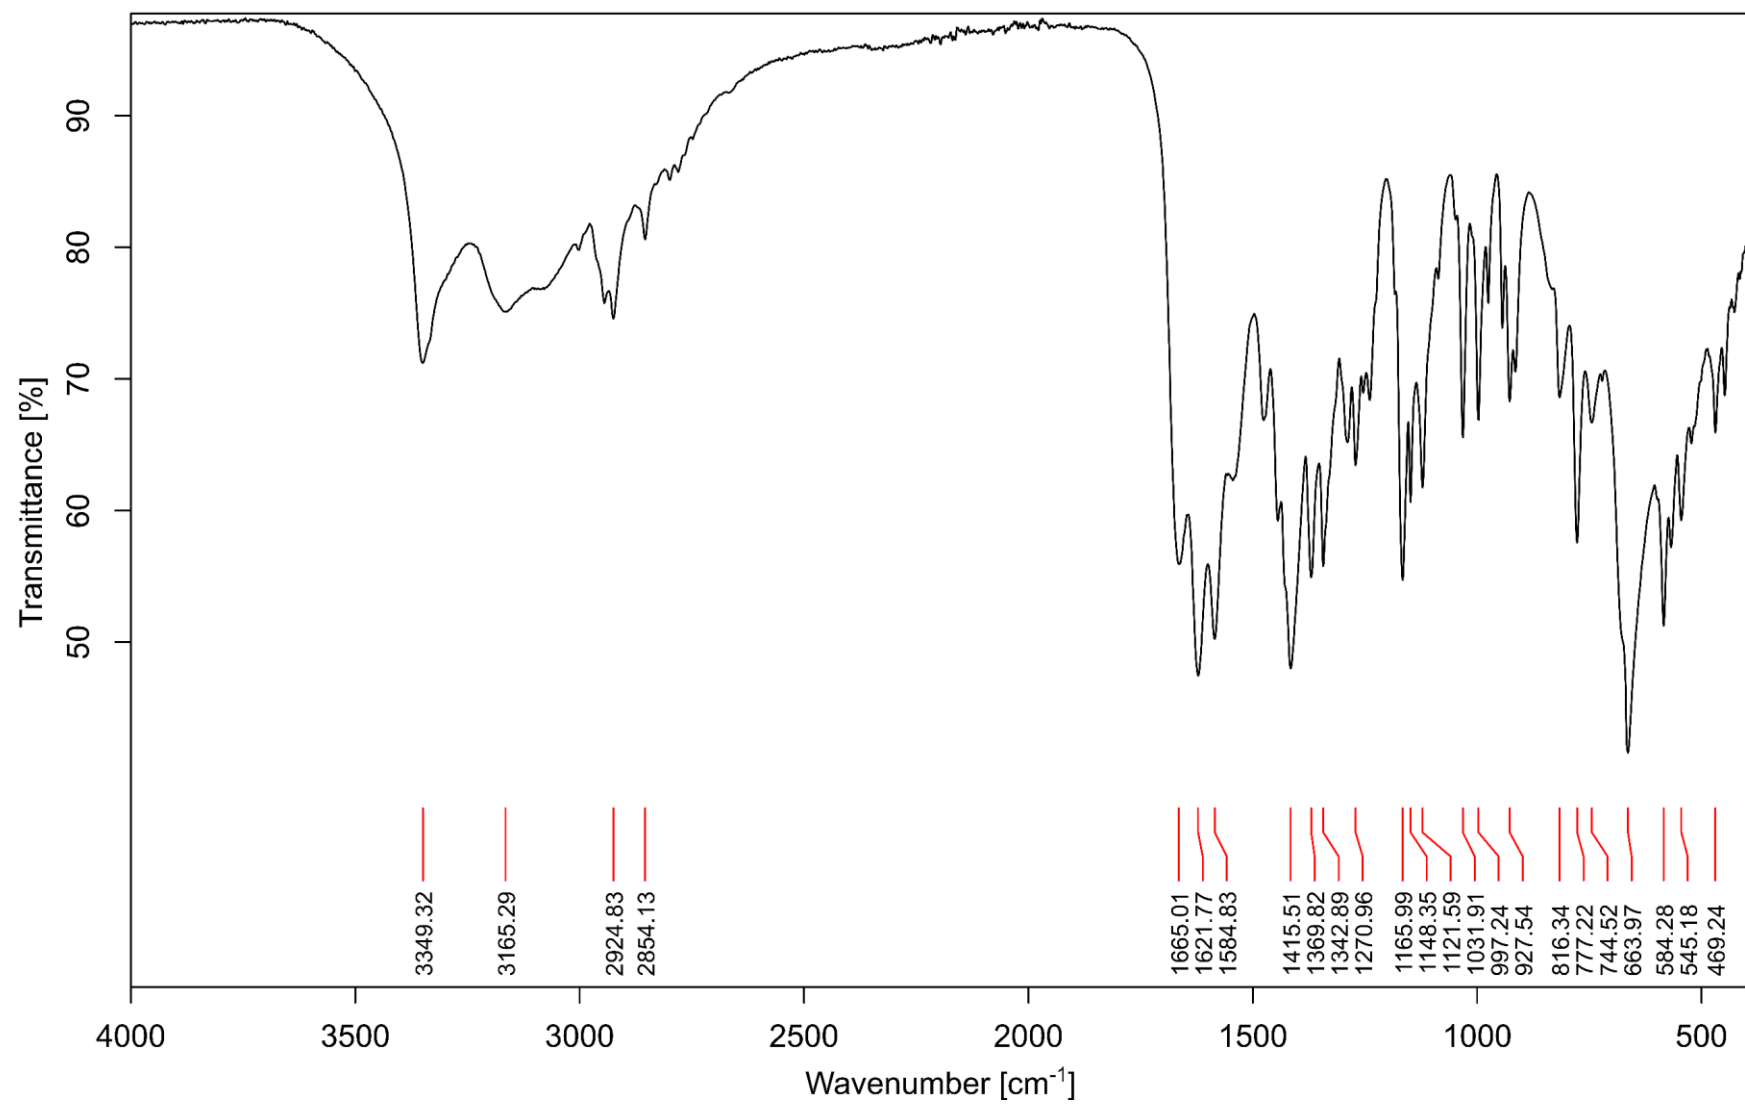

**Figure S32.** Infrared spectrum of  $[\text{Zn}(\text{quin})_2(\text{pz})]_n$  (**9**).

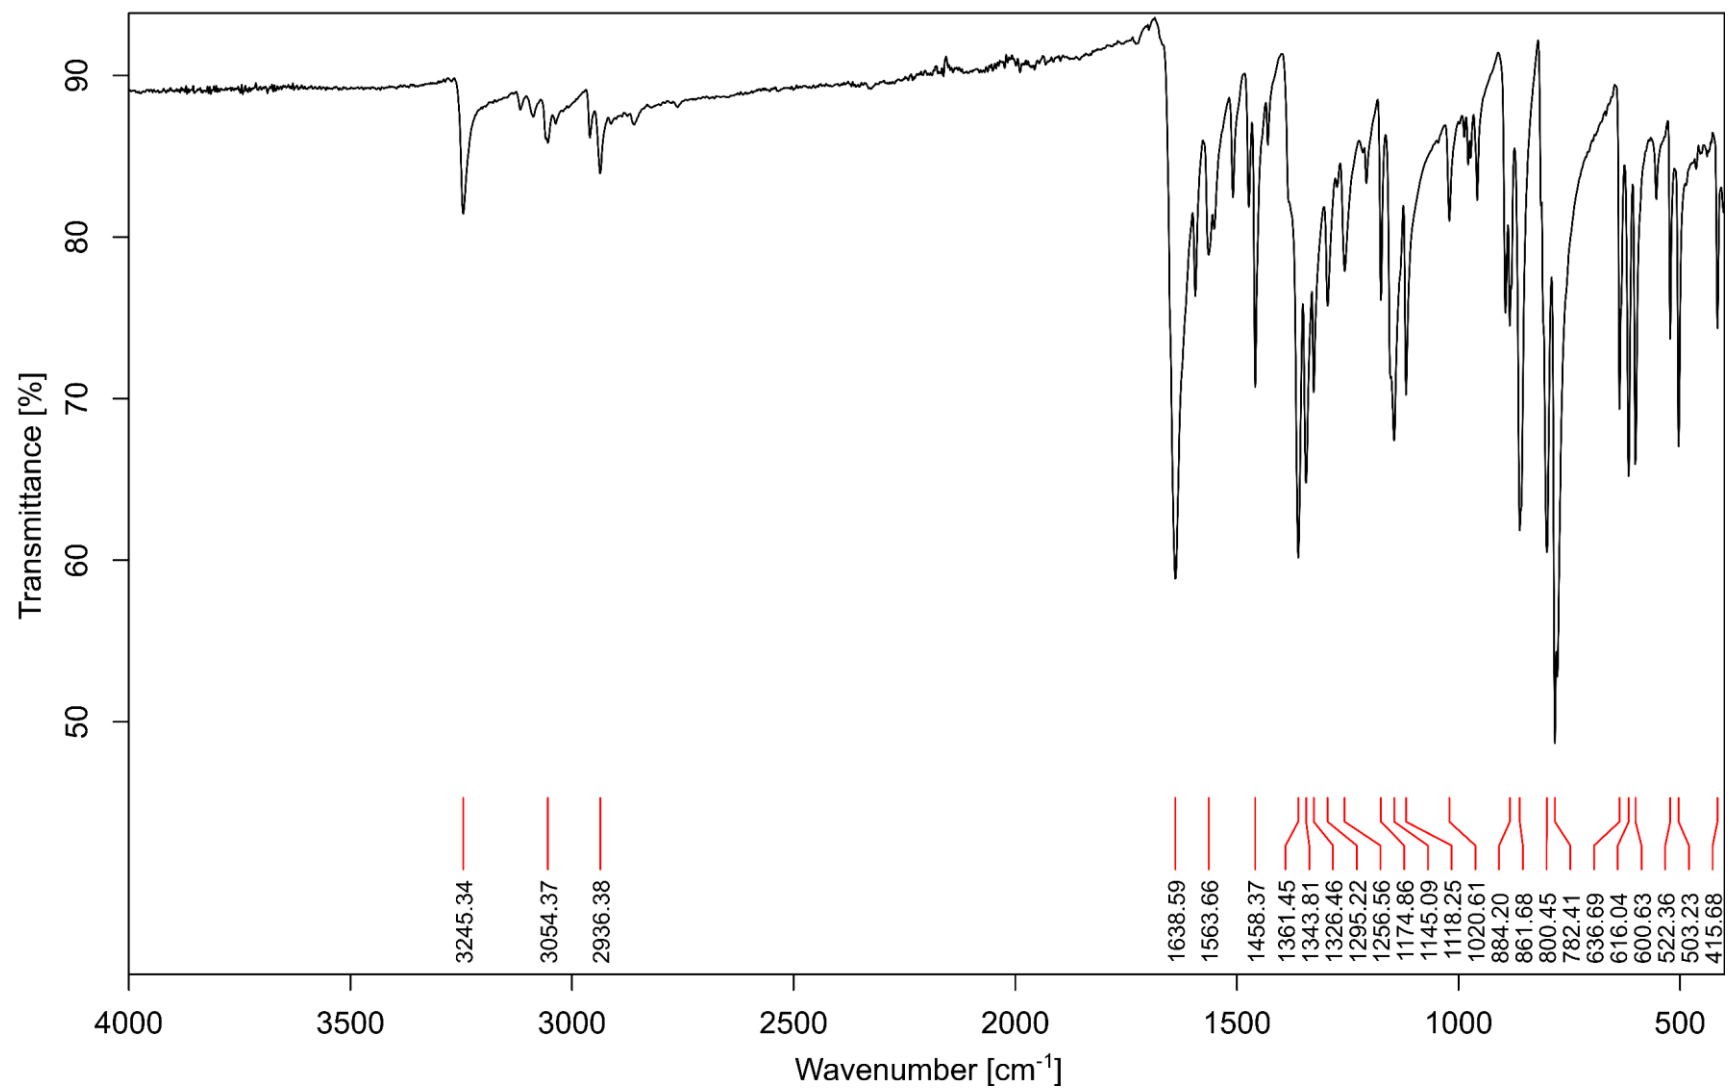

**Figure S33.** Infrared spectrum of  $[\text{Zn}(\text{quin})_2(1\text{-Mepz})]$  (**10**).

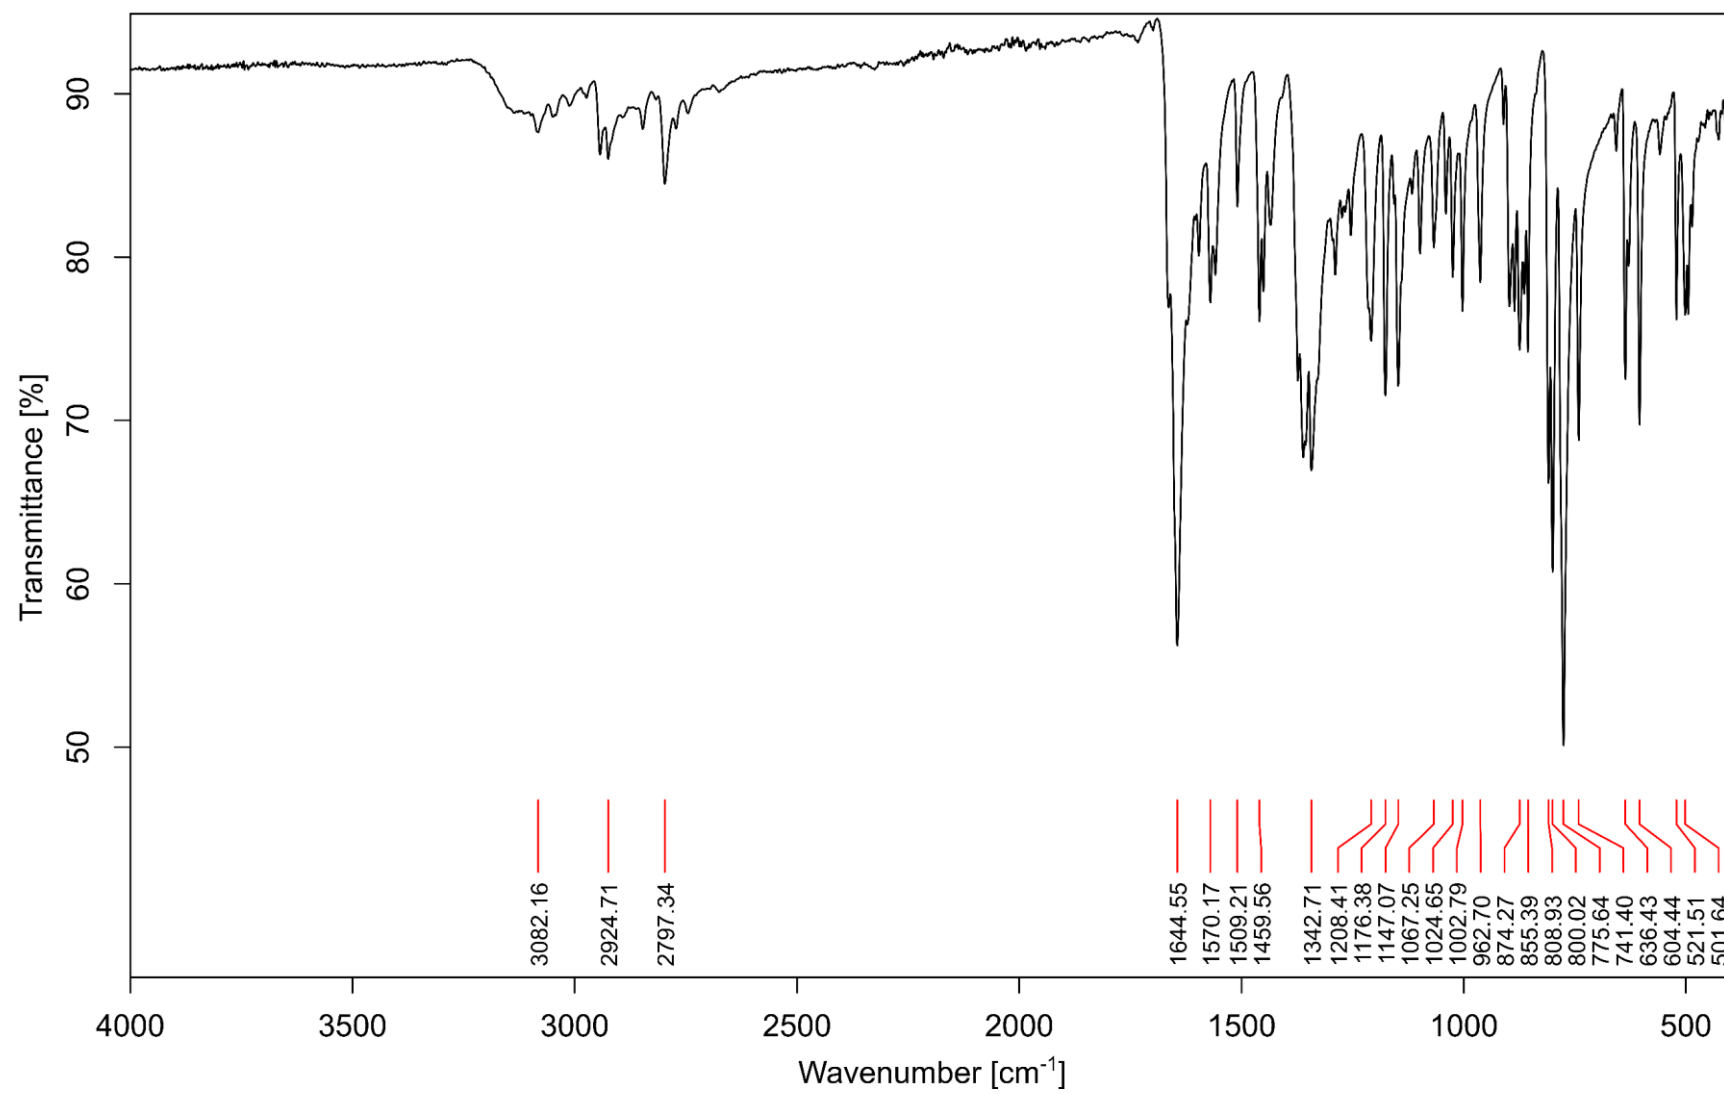

Figure S34. Infrared spectrum of  $[\text{Zn}(\text{quin})_2(1\text{-Mepz})_2]\cdot 0.5\text{CH}_3\text{CN}$  (**11**).

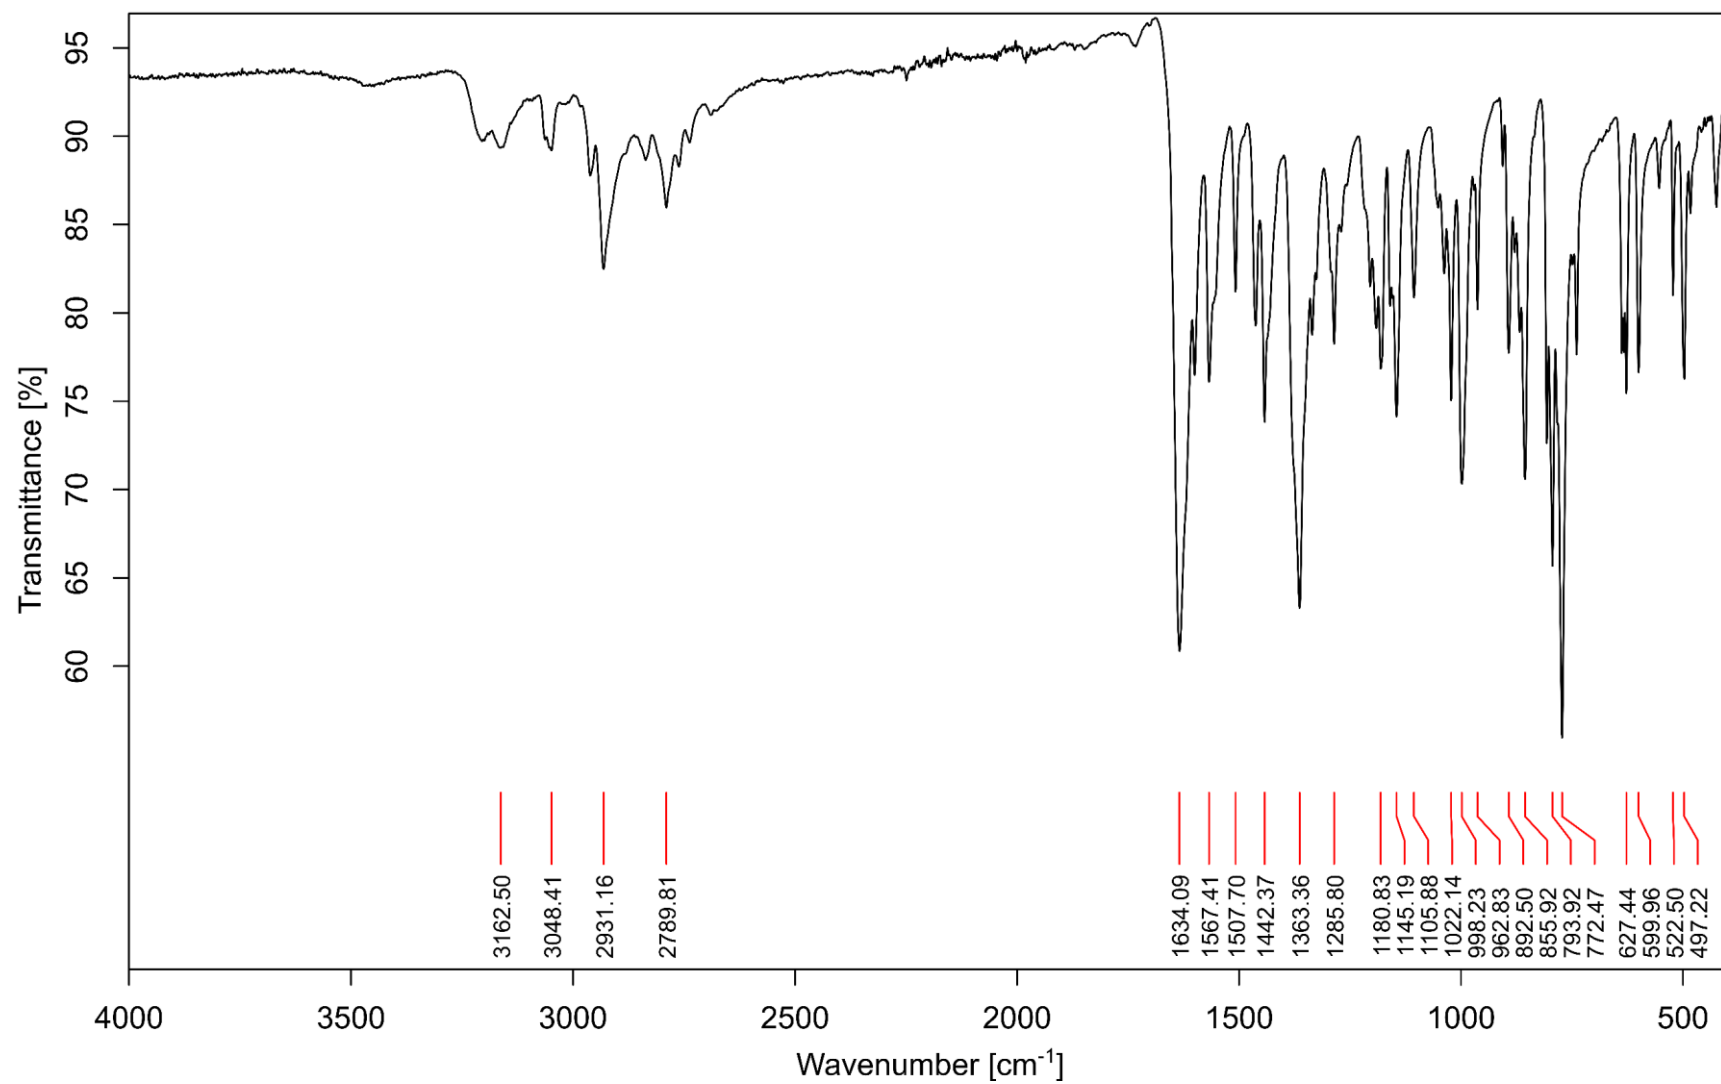



Figure S35. Infrared spectrum of [Zn(quin)<sub>2</sub>(1-Mepzam)] (12).

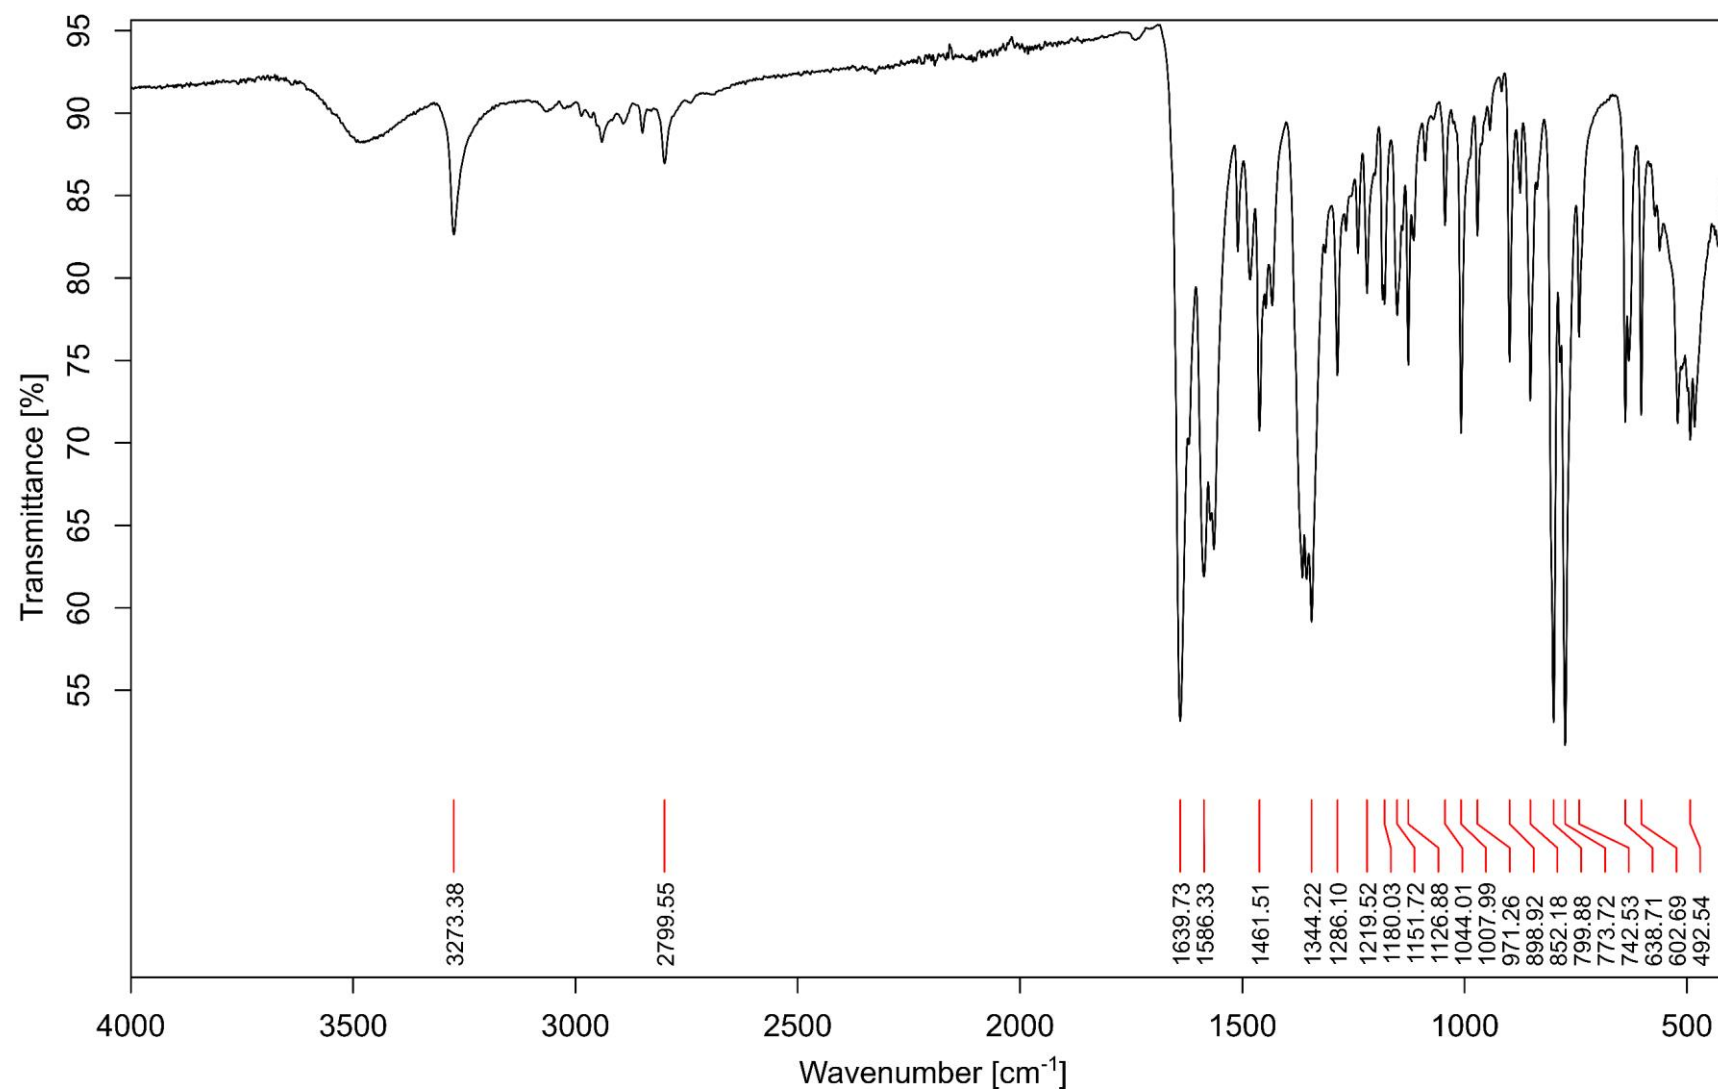

**Figure S36.** Infrared spectrum of  $[\text{Zn}(\text{quin})_2(1\text{-Etpz})_2] \cdot 0.5\text{CH}_3\text{CN}$  (**13**).

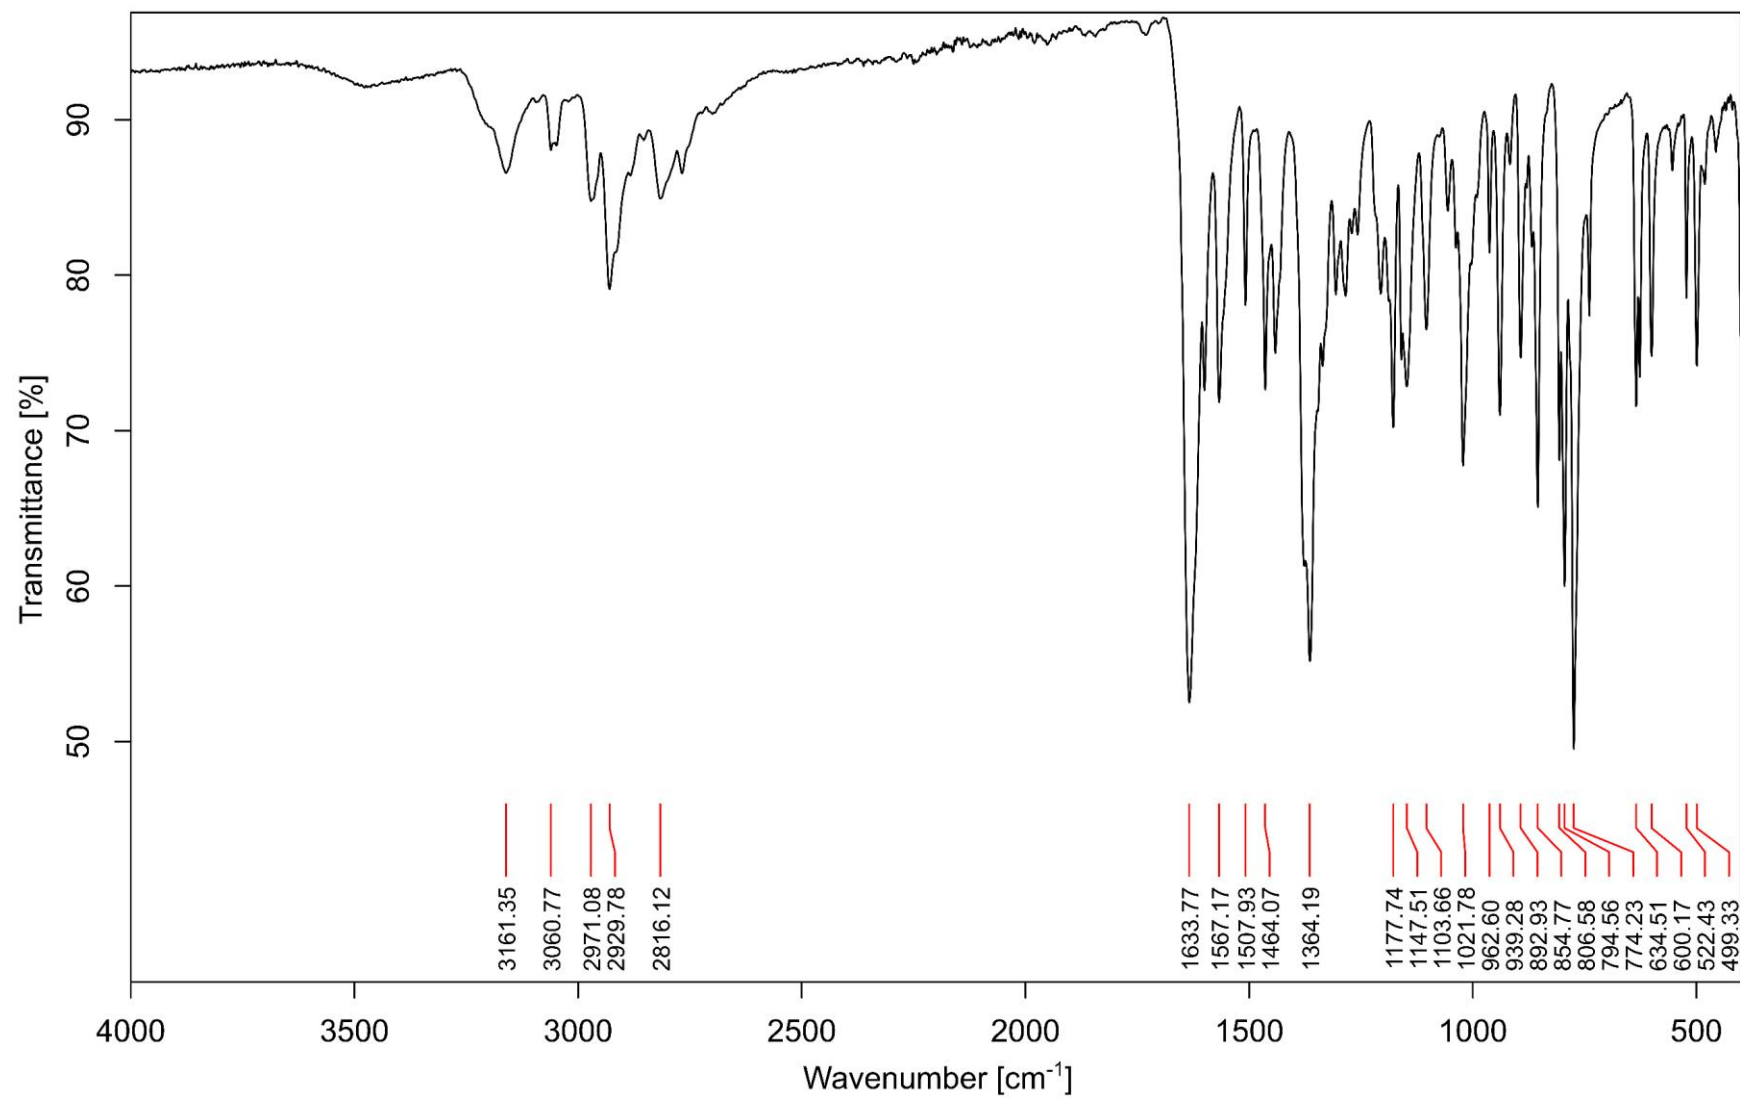

**Figure S37.** Infrared spectrum of  $[\text{Zn}(\text{quin})_2(1\text{-Etpzam})]\cdot\text{H}_2\text{O}$  (**14**).

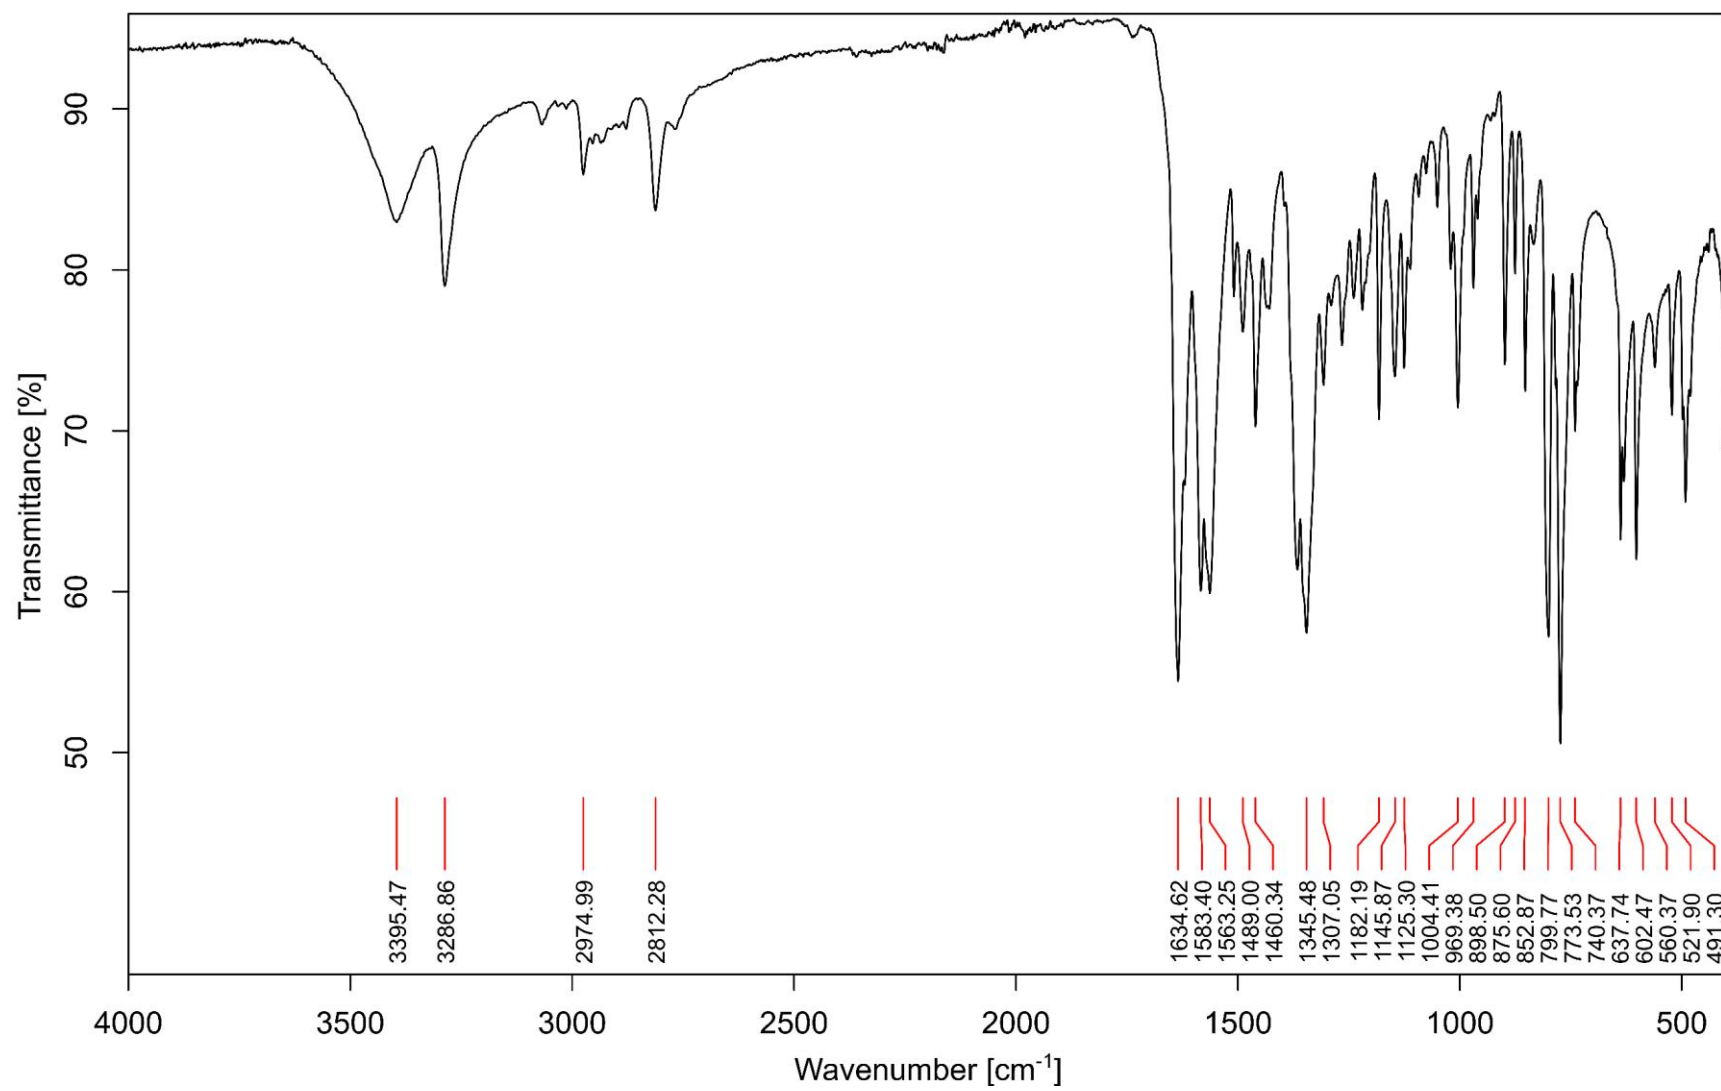

**Figure S38.** Infrared spectrum of  $[\text{Zn}(\text{quin})_2(1\text{-OHEtpz})_2]\cdot 2\text{CH}_3\text{CN}$  (**15**).

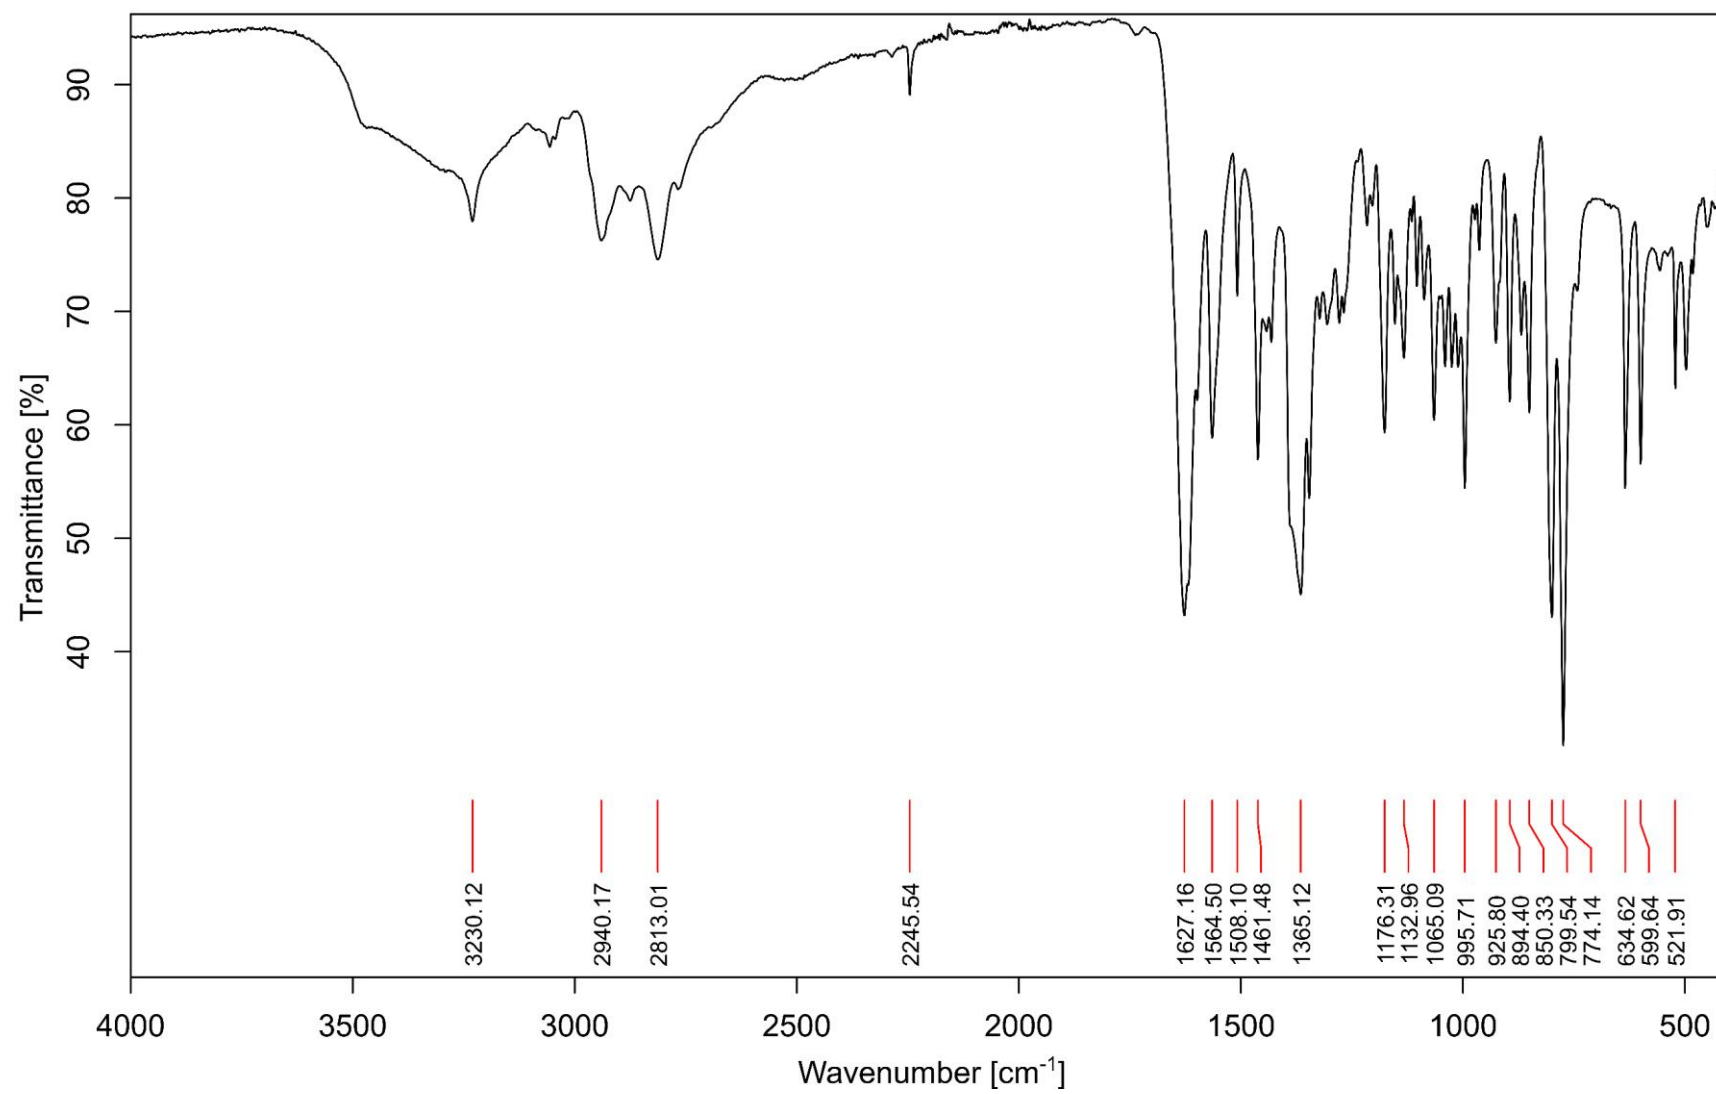

Figure S39. Infrared spectrum of [Zn(quin)<sub>2</sub>(1-OHEtpzam)] (**16**).

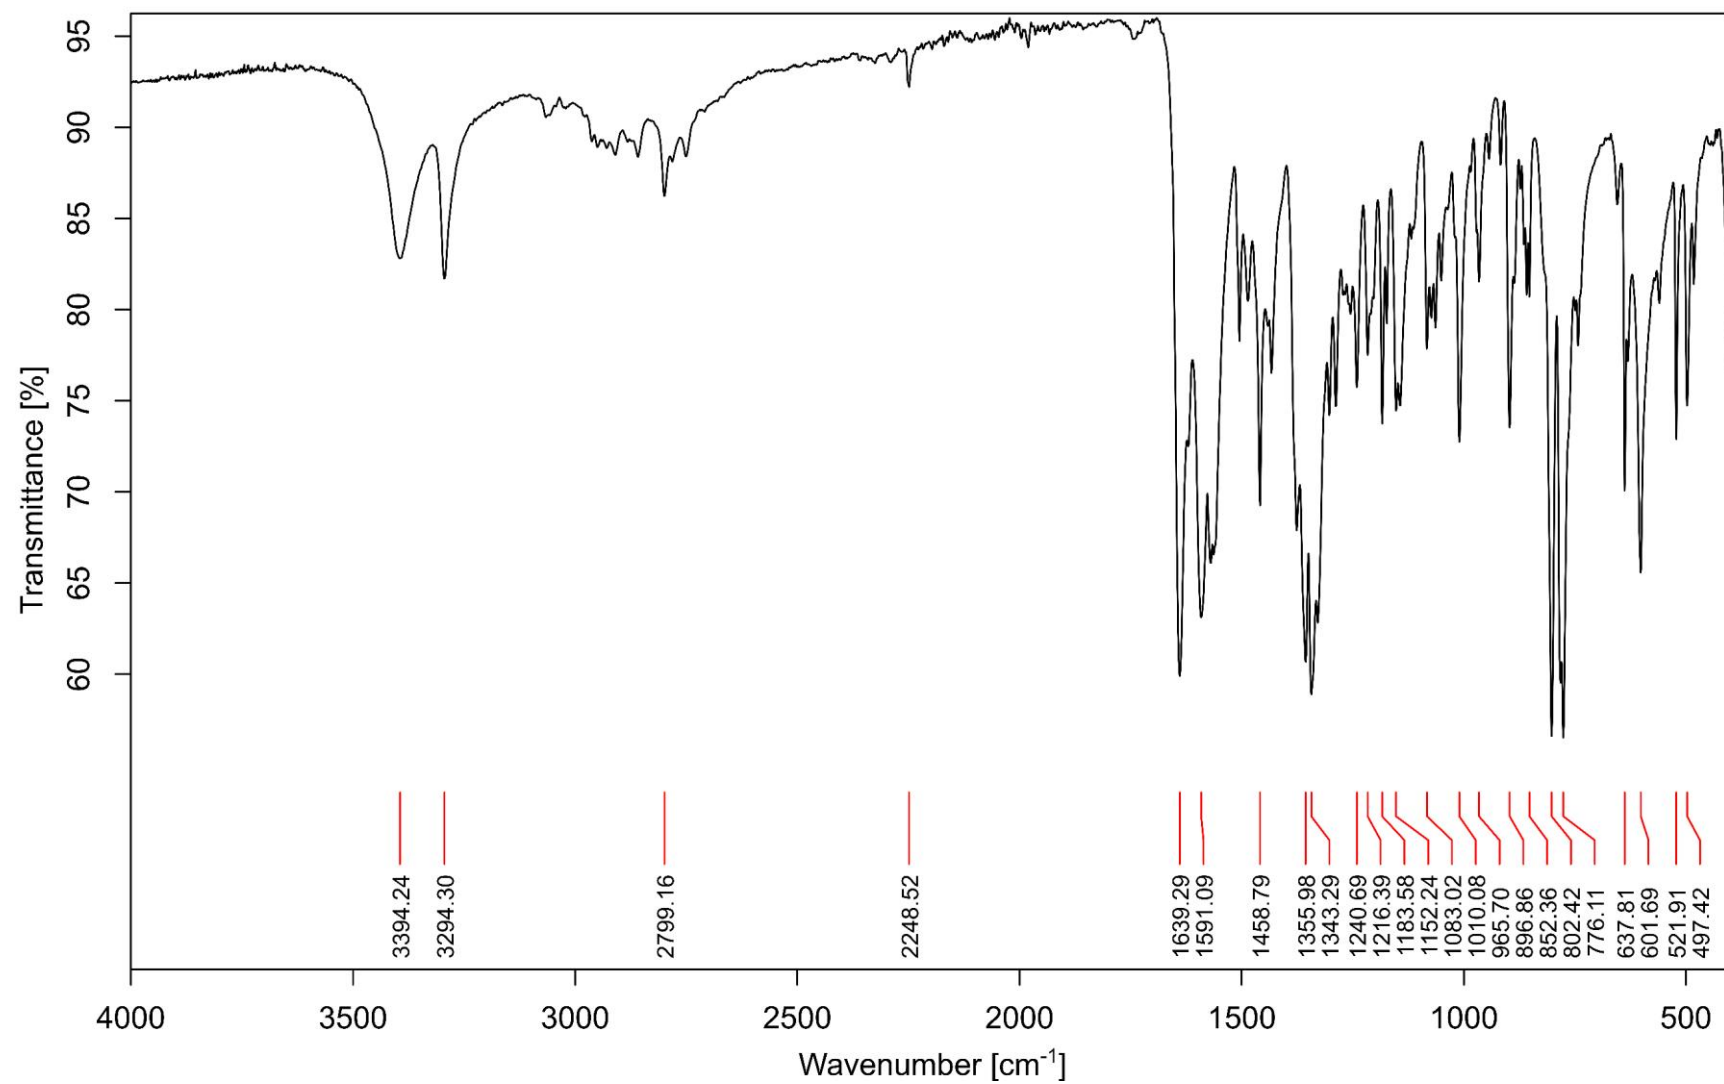

**Figure S40.** Infrared spectrum of  $[\text{Zn}(\text{quin})_2(1\text{-Phpz})_2]\cdot\text{CH}_3\text{CN}$  (**17**).

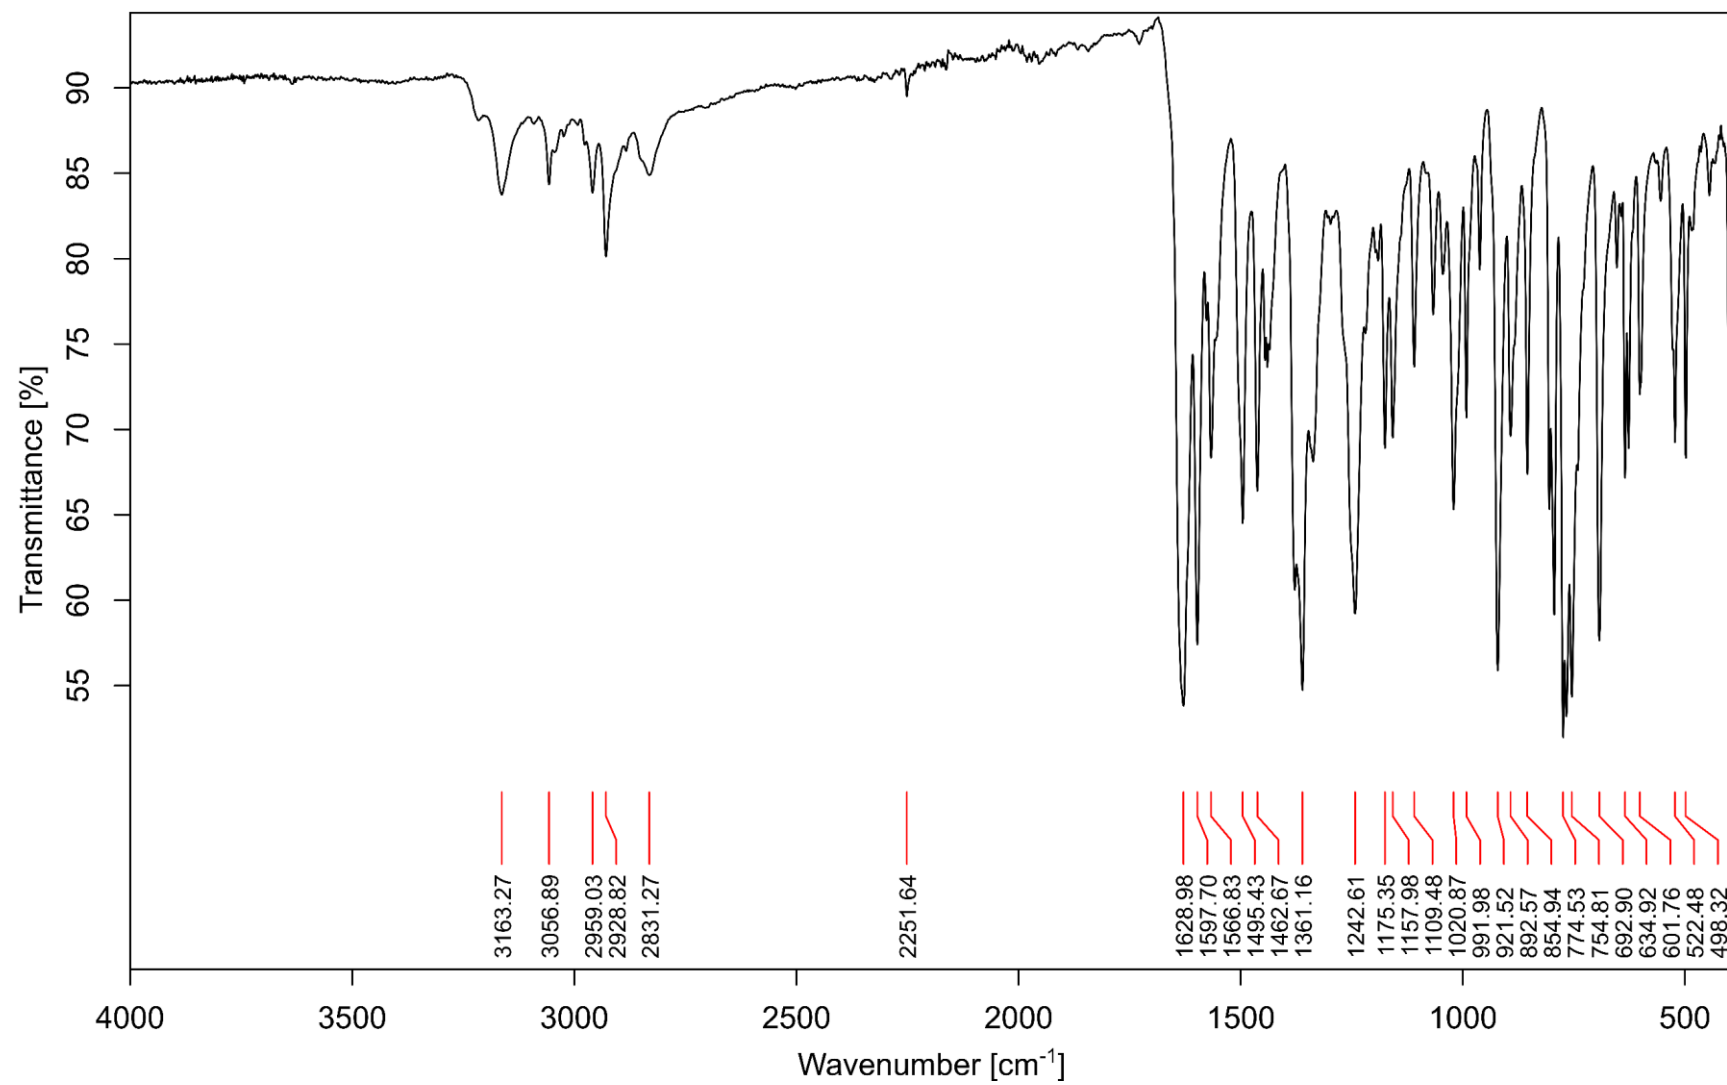

**Figure S41.** Infrared spectrum of the first polymorph of  $[\text{Zn}(\text{quin})_2(1\text{-Phpz})_2]\cdot 2\text{acetamide}$ .

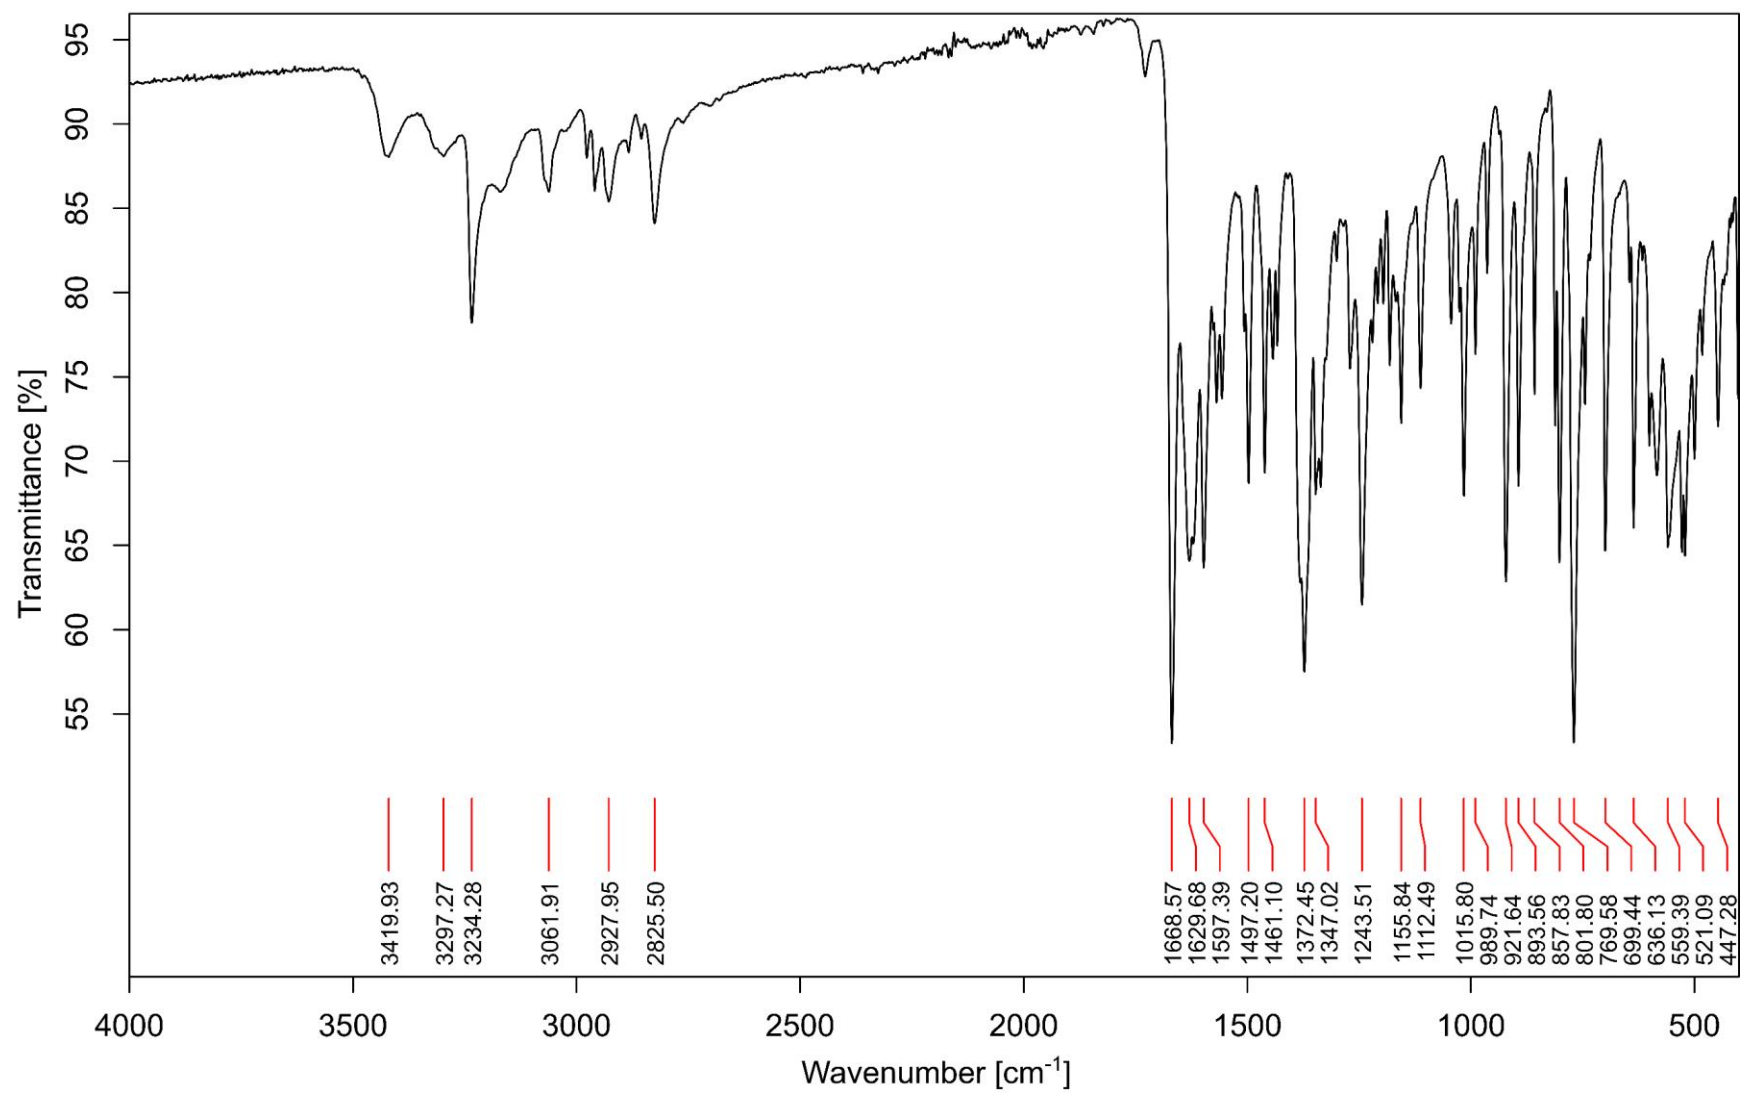

**Figure S42.** Infrared spectrum of the second polymorph of  $[\text{Zn}(\text{quin})_2(1\text{-Phpz})_2]\cdot 2\text{acetamide}$ .

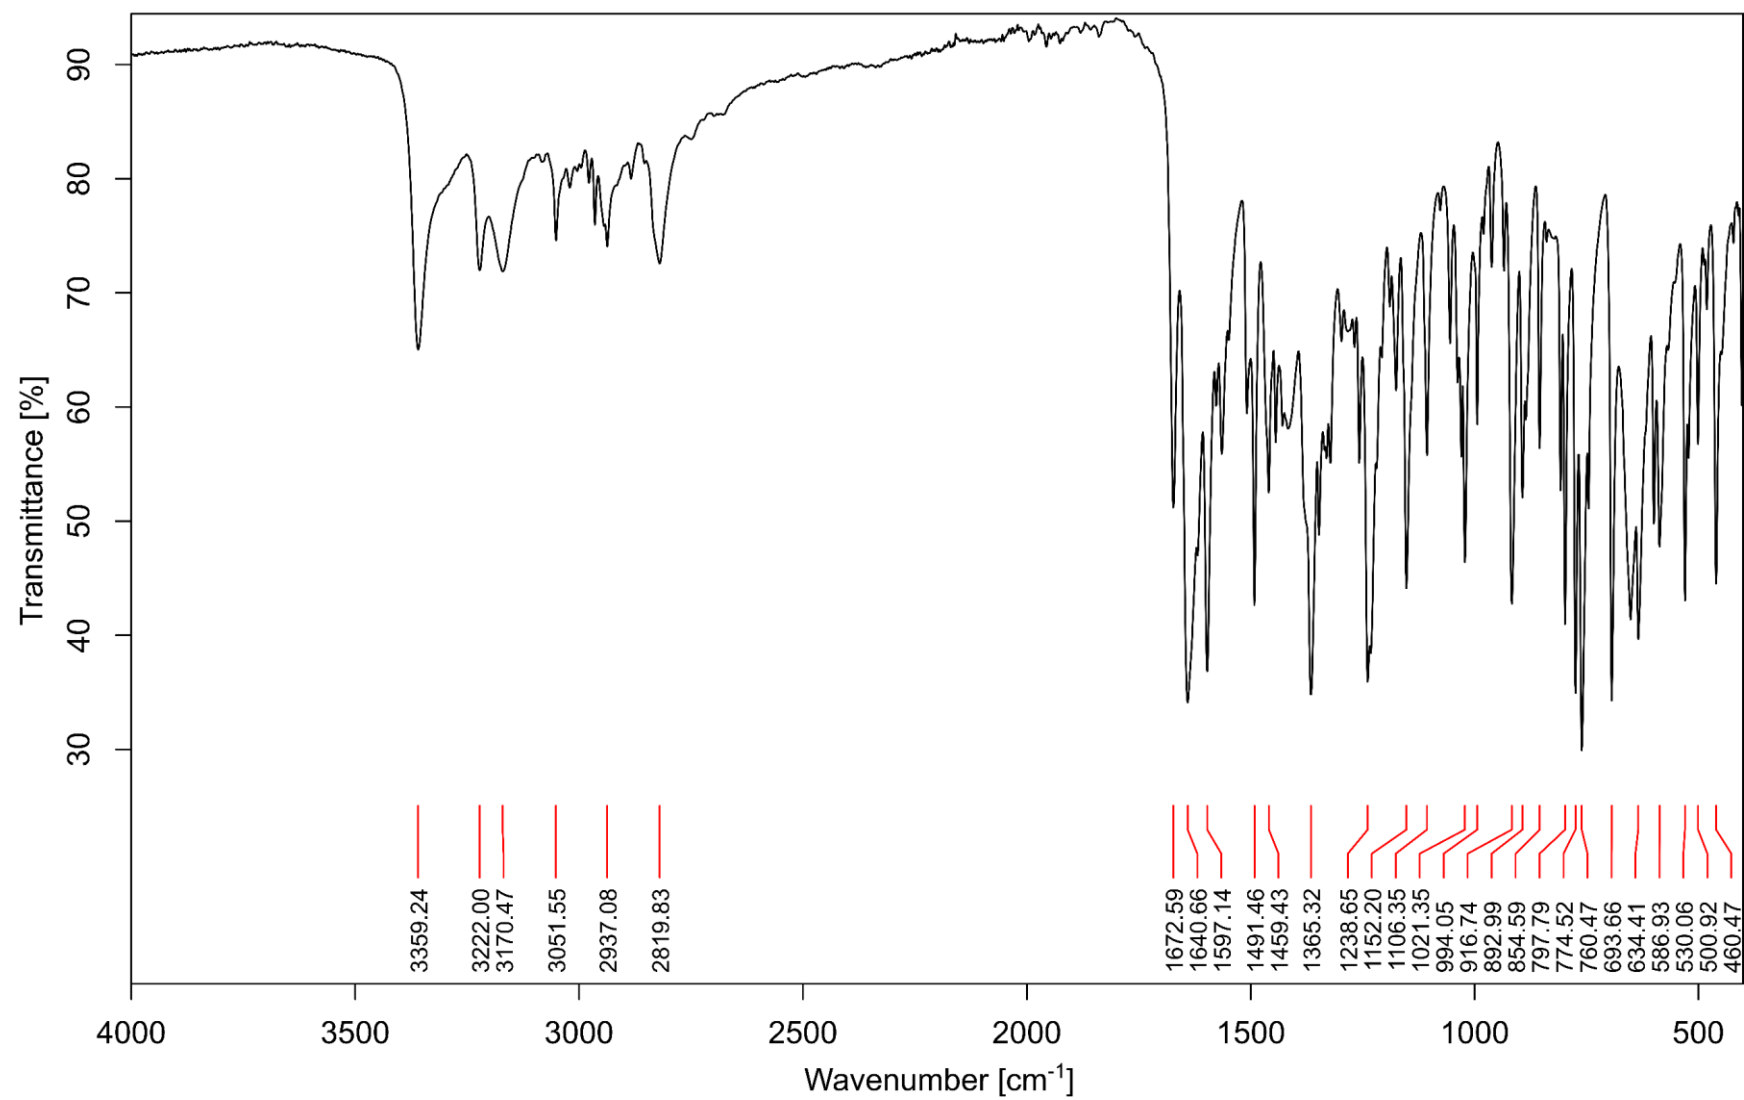



**Figure S43.** Infrared spectrum of  $[\text{Zn}(\text{quin})_2(1\text{-Phpzam})]\cdot 0.5(1\text{-Phpz})\cdot \text{CH}_3\text{CN}$  (**19**).

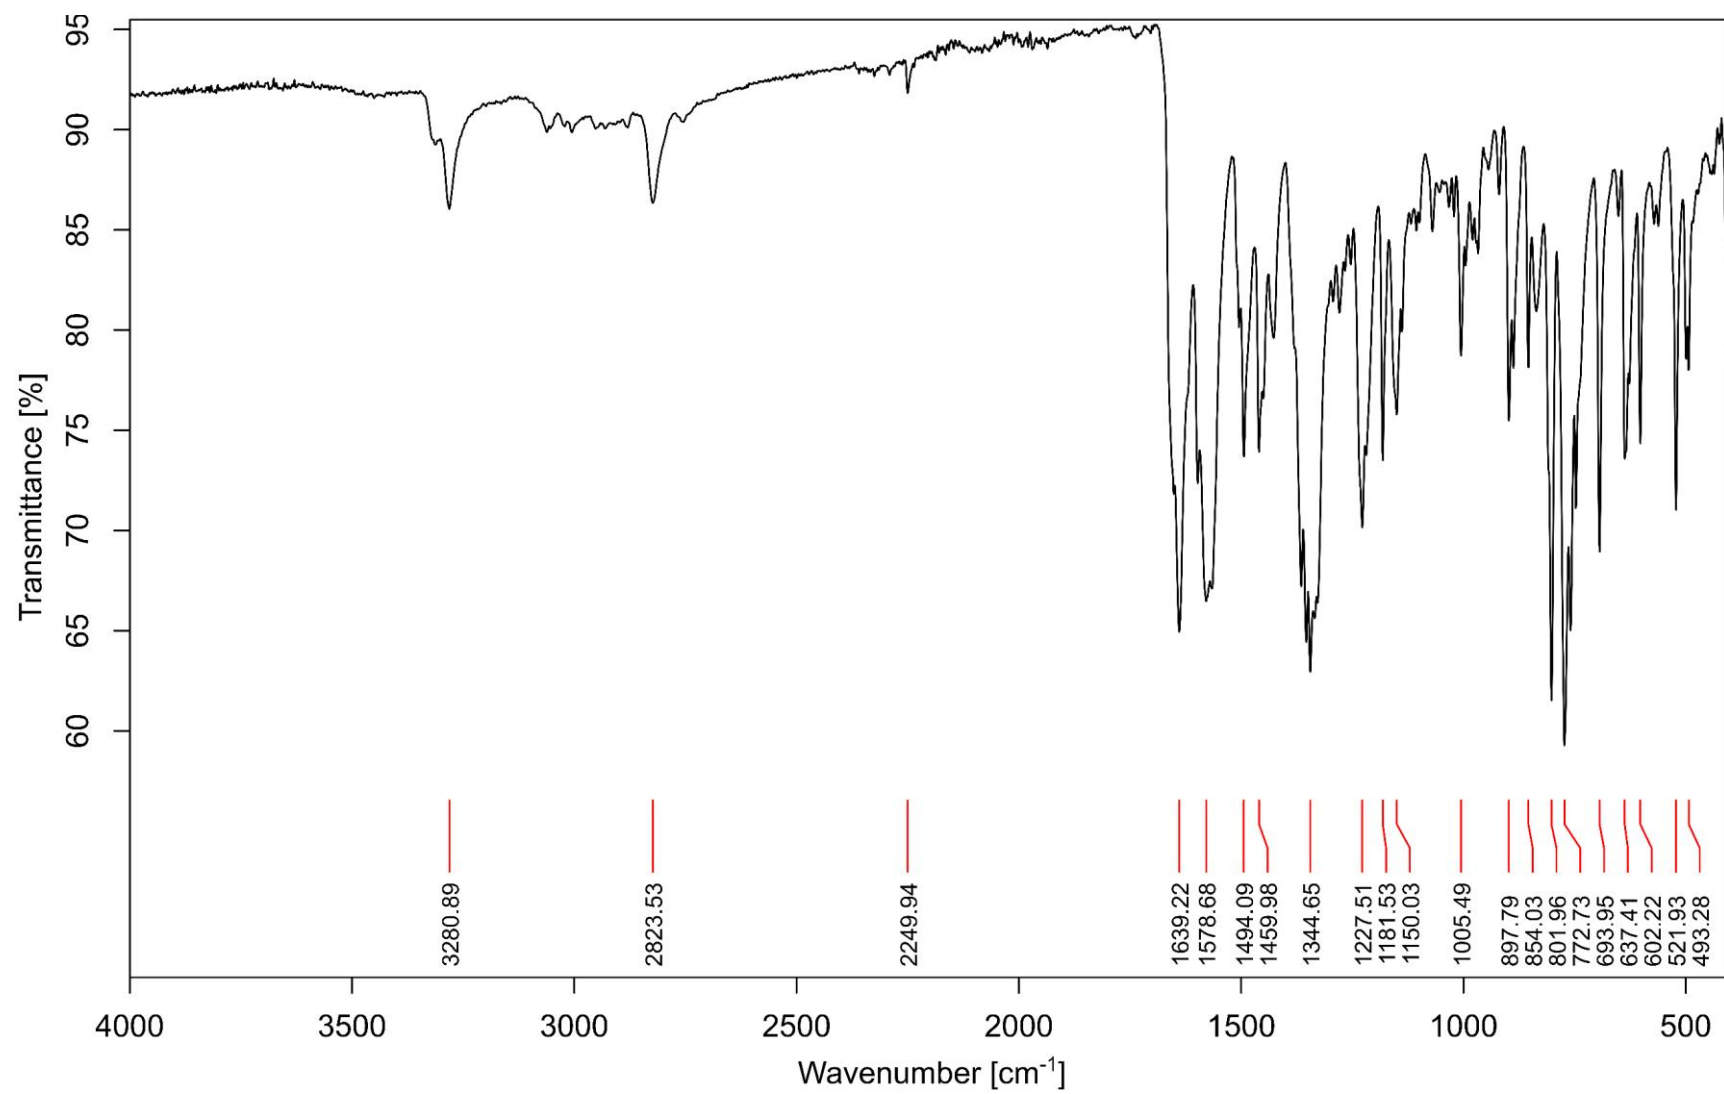

**Figure S44.** Infrared spectrum of  $[\text{Zn}(\text{quin})_2(1\text{-Acpz})_2]\cdot 2\text{CH}_3\text{CN}$  (**21**).

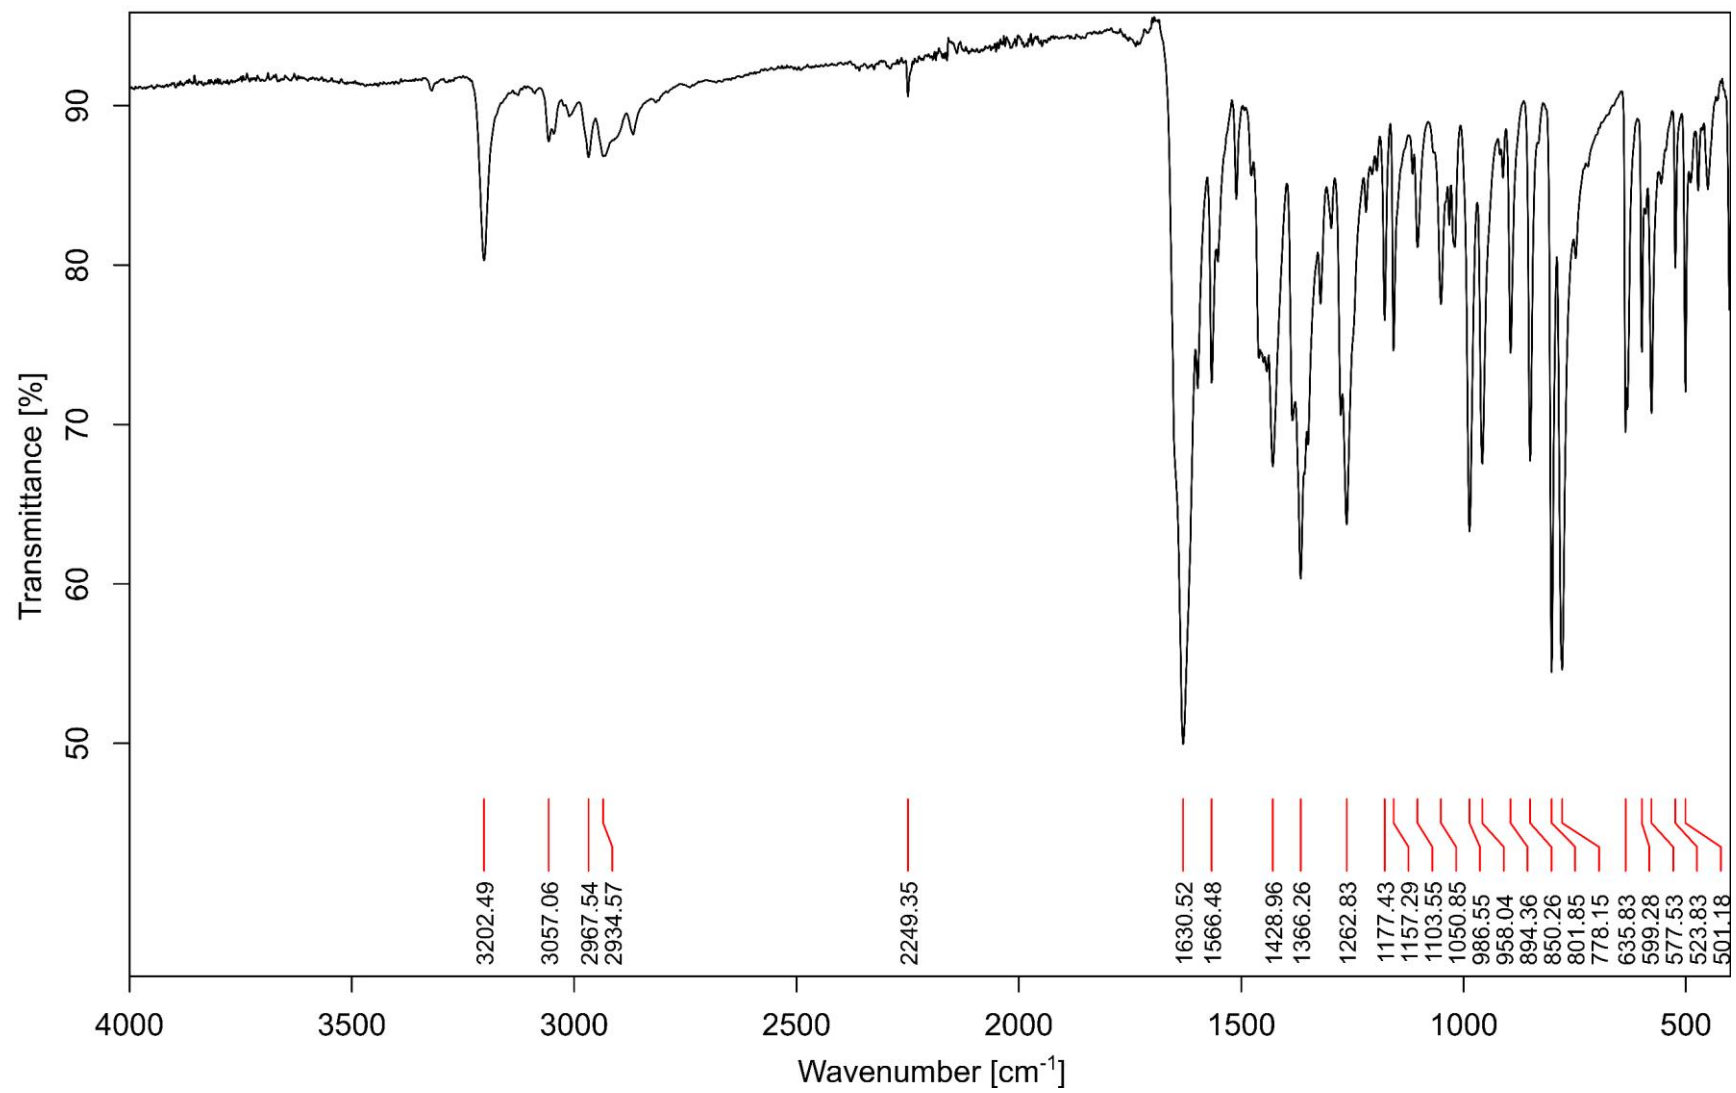

**Figure S45.** Infrared spectrum of  $[\text{Zn}(\text{quin})_2(1\text{-Acpz})_2] \cdot [\text{Zn}(\text{quin})_2(\text{pz})]_n \cdot 4\text{CH}_3\text{CN}$  (**22**).

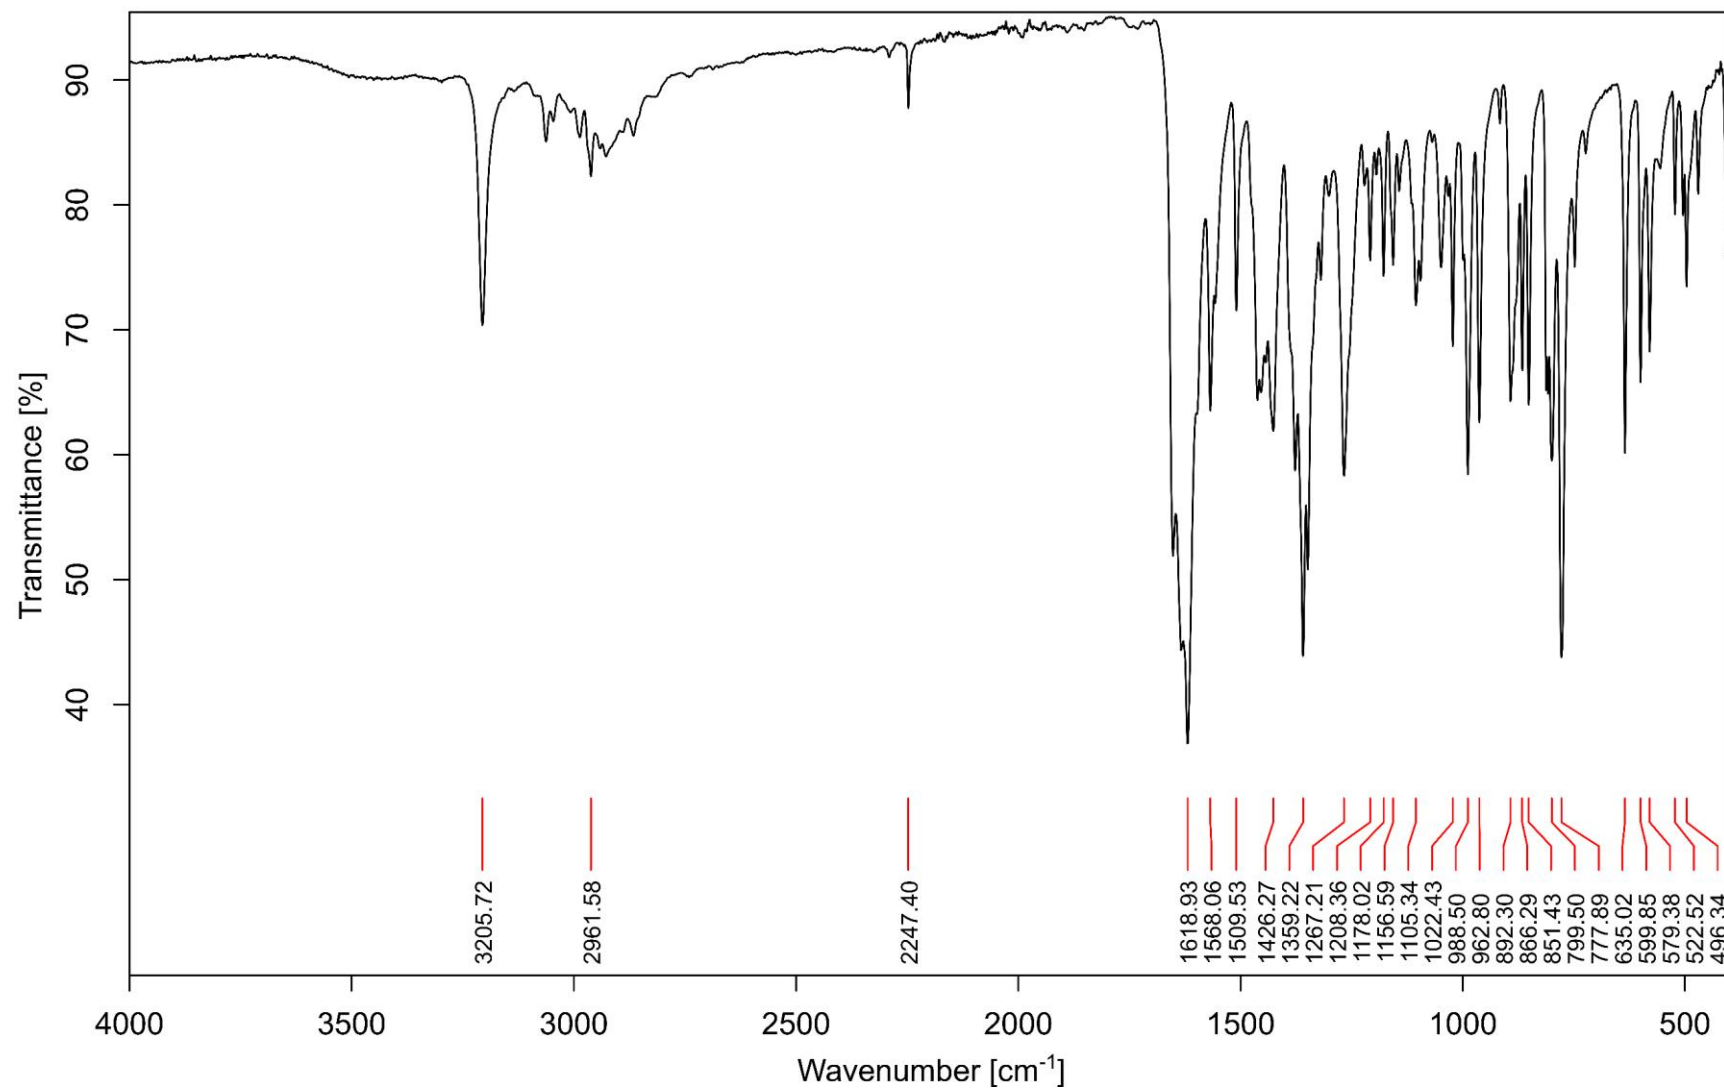

**Figure S46.** Infrared spectrum of  $[\text{Zn}(\text{quin})_2(\text{am})] \cdot 1.3\text{CH}_3\text{CN} \cdot 0.2\text{H}_2\text{O}$  (**23**).

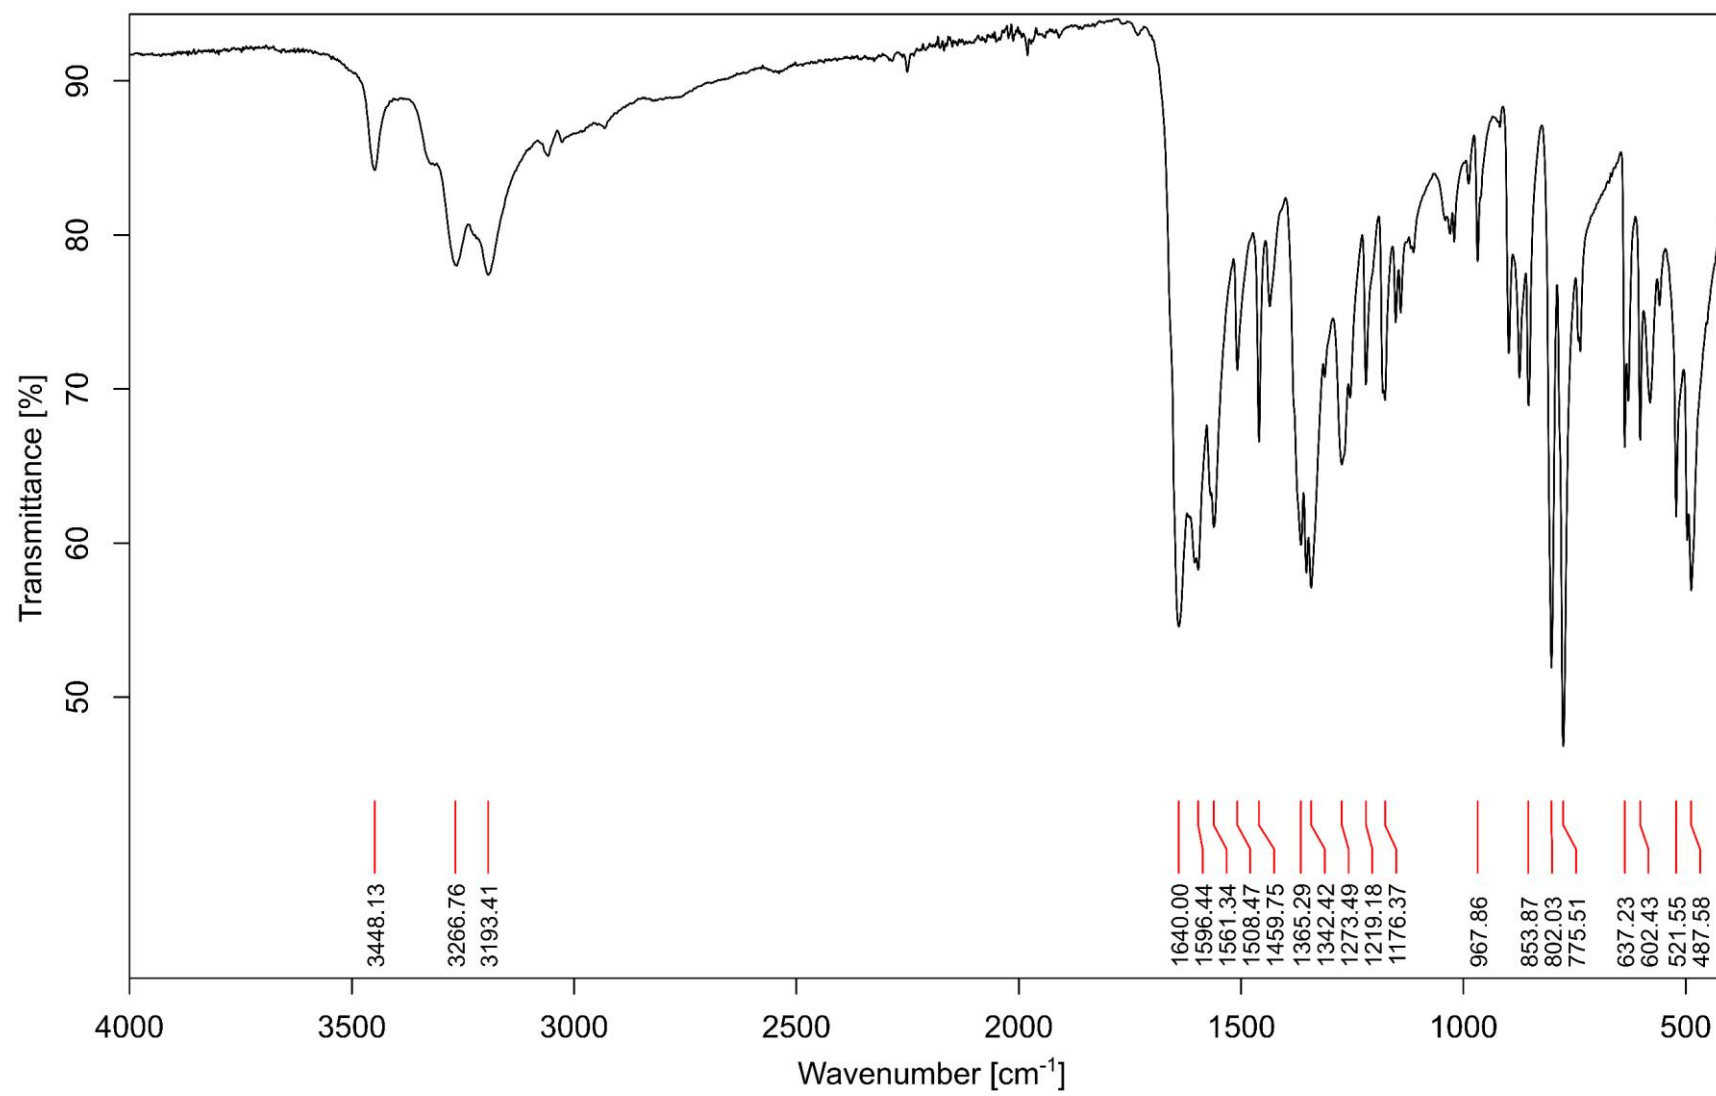

#### 4. <sup>1</sup>H NMR spectroscopy

Figure S47. <sup>1</sup>H NMR spectrum of 4-MepipeH[Zn(quin)<sub>3</sub>] (**4**) in DMSO-*d*<sub>6</sub>.

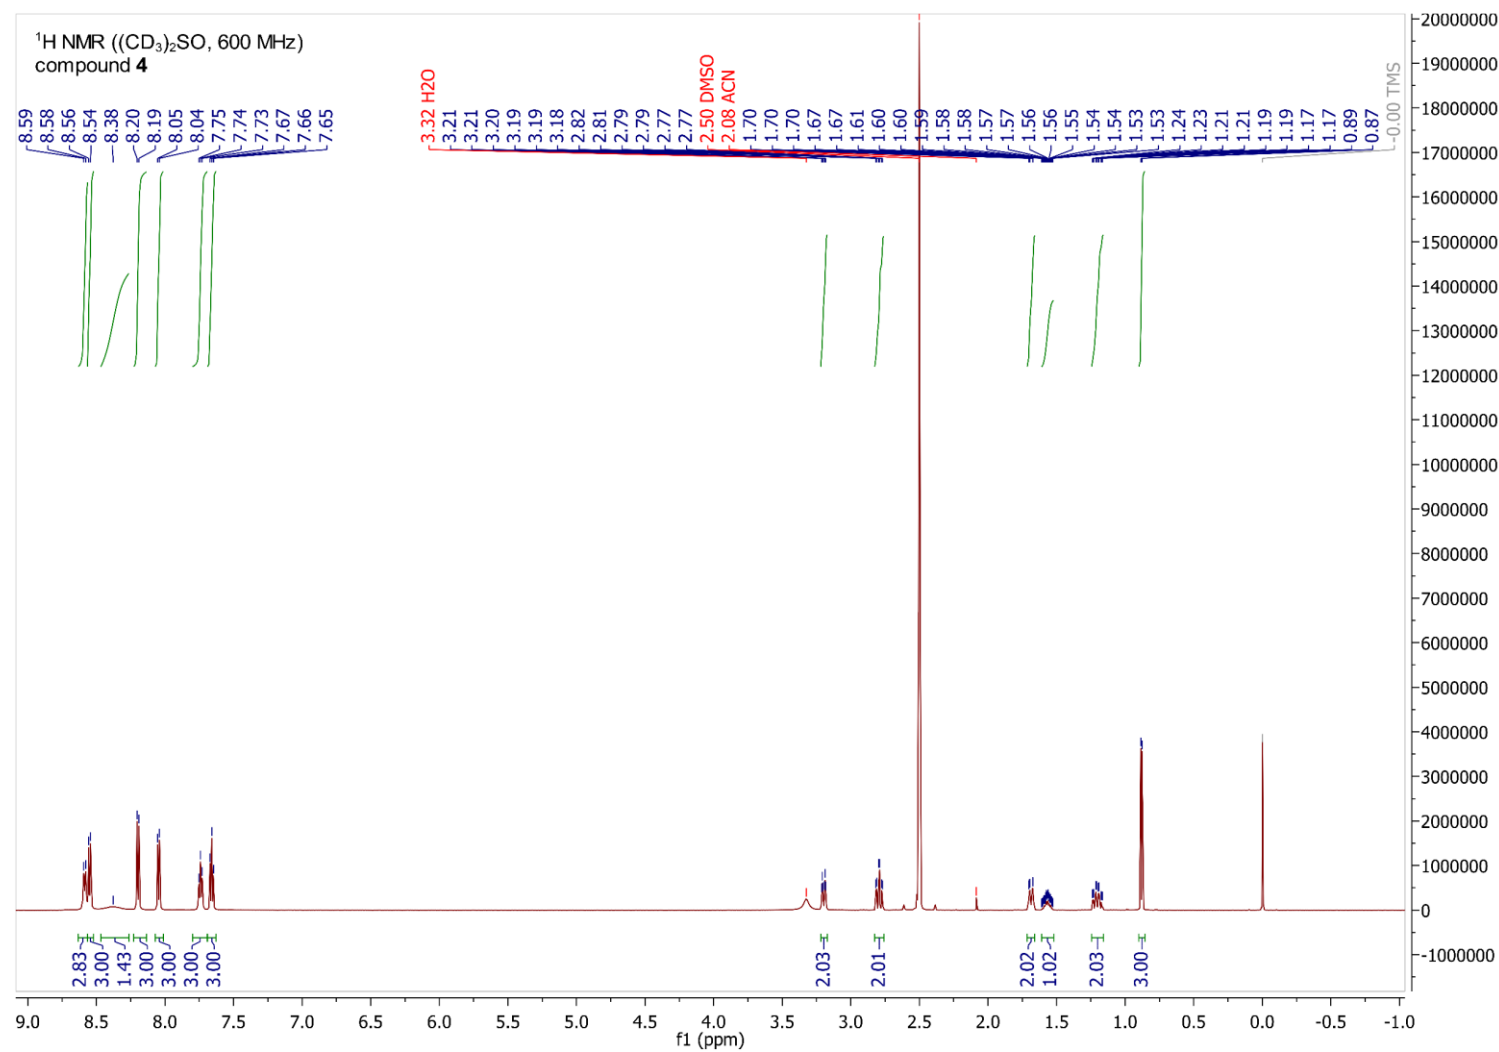

**Figure S48.**  $^1\text{H}$  NMR spectrum of  $[\text{Zn}(\text{quin})_2(4\text{-amidepipeam})]$  (**7**) in  $\text{DMSO-}d_6$ .

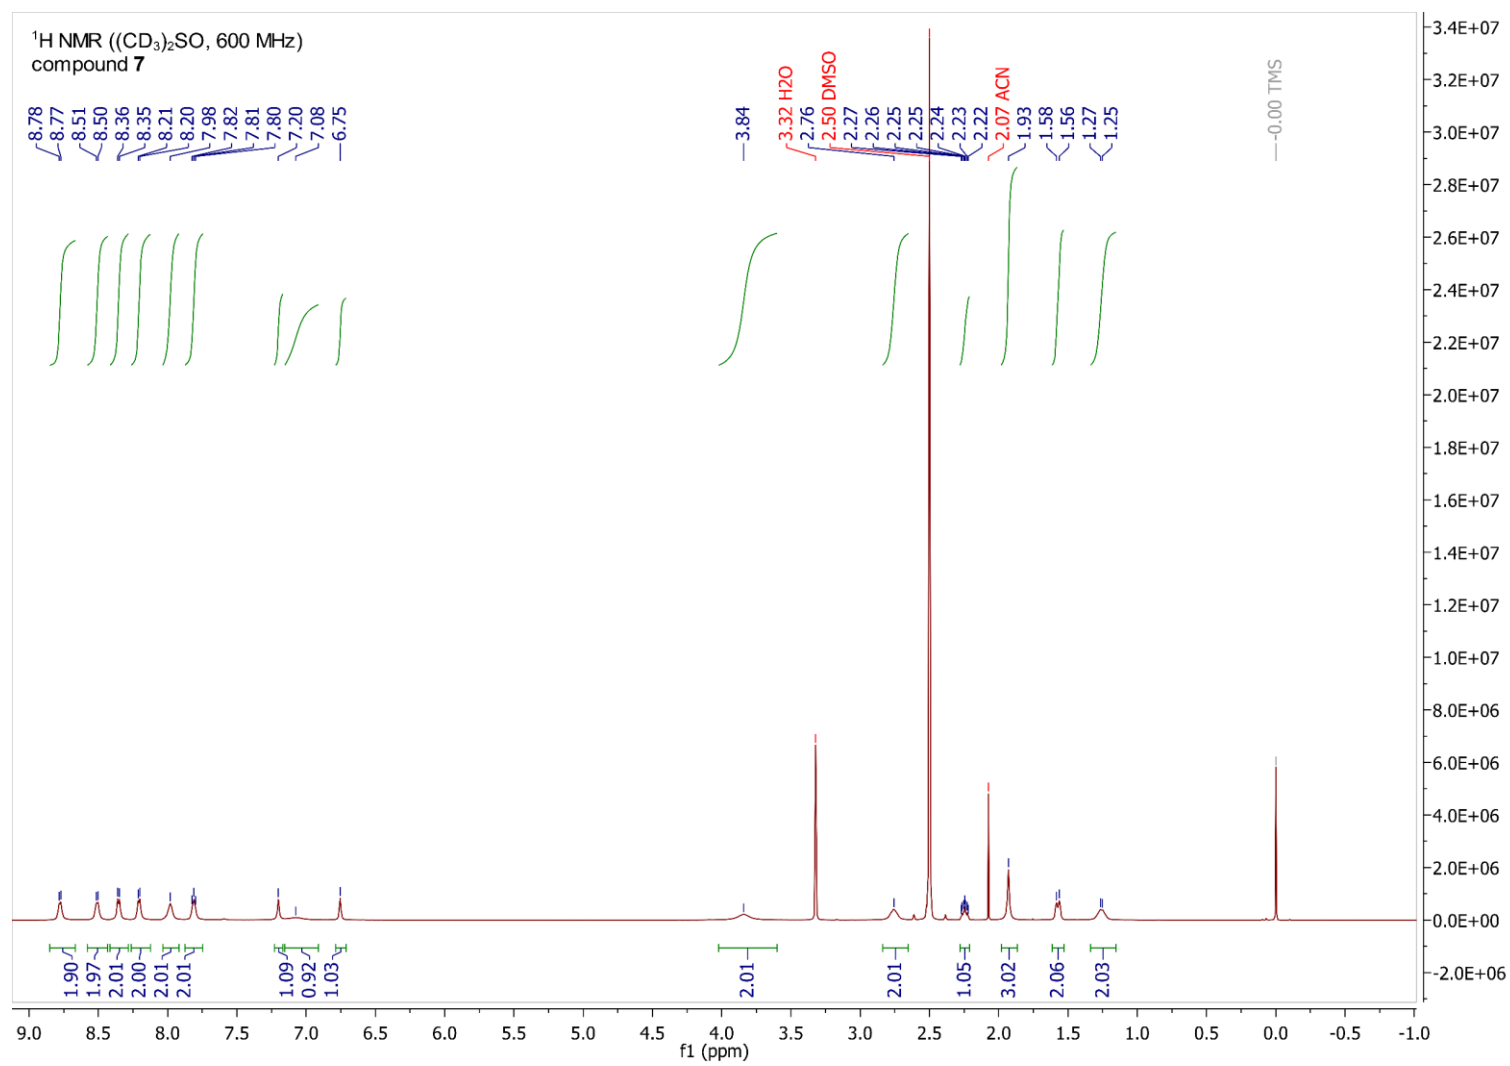

Figure S49. <sup>1</sup>H NMR spectrum of 4-amidepeam (**8**) in DMSO-*d*<sub>6</sub>.

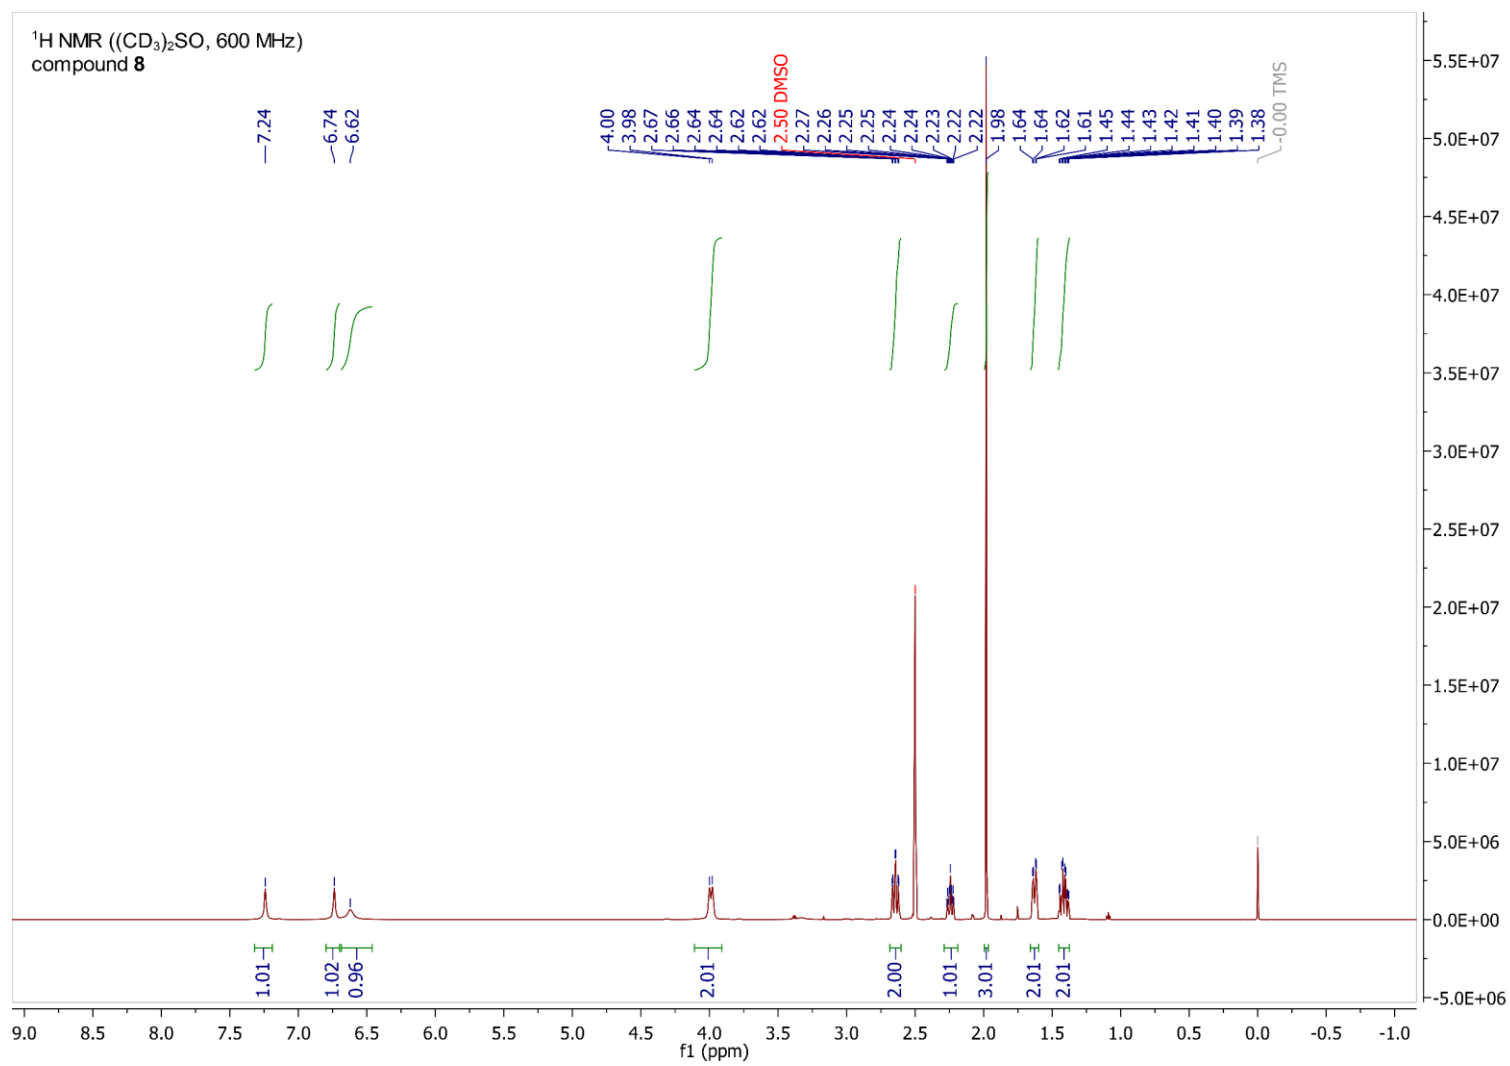

**Figure S50.**  $^1\text{H}$  NMR spectrum of  $[\text{Zn}(\text{quin})_2(\text{pz})]_n$  (**9**) in  $\text{DMSO-}d_6$  with the addition of trifluoroacetic acid (TFA).

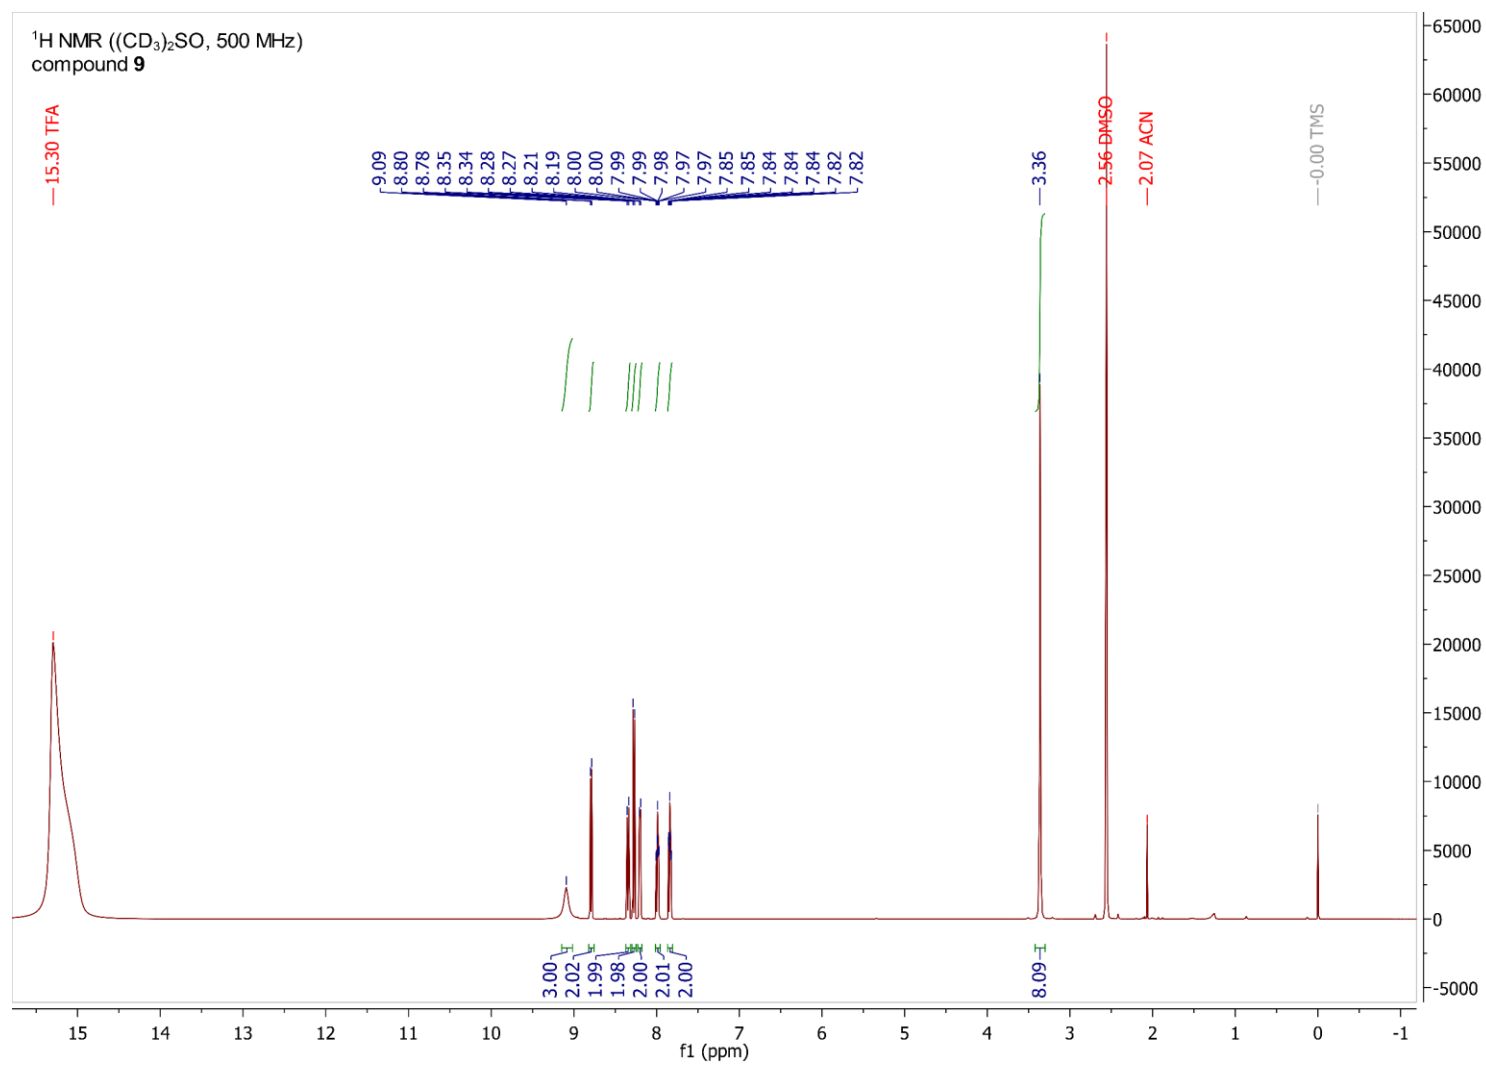

Supplement: d4nj00235k1.pdf [file d4nj00235k1.pdf]
